# Supplementary material for: Palladium-catalyzed oxidative C–H bond acylation of N-nitrosoanilines with toluene derivatives: a traceless approach to synthesize N-alkyl-2-aminobenzophenones
Source: Royal Society of Chemistry journal article supplement (doi:10.1039/c4cc07440h), 2014-01-01
Supplement: c4cc07440h1.pdf [file c4cc07440h1.pdf]

## Supporting Information

### Palladium-catalyzed oxidative C-H bond acylation of *N*-nitrosoanilines with toluene derivatives: a traceless approach to *N*-alkyl-2-aminobenzophenones

Yinuo Wu<sup>a</sup>, Xiao Lu<sup>a</sup>, Ling-Jun Feng<sup>a</sup>, Fuk Yee Kwong<sup>\*b</sup> and Hai-Bin Luo<sup>\*a</sup>

<sup>§</sup>School of Pharmaceutical Sciences, Sun Yat-sen University, Guangzhou 510006, China;

<sup>†</sup>State Key Laboratory of Chirosciences and Department of Applied Biology and Chemical Technology, The Hong Kong Polytechnic University, Hong Kong

E-mail: [fuk-yee.kwong@polyu.edu.hk](mailto:fuk-yee.kwong@polyu.edu.hk) and [luohb77@mail.sysu.edu.cn](mailto:luohb77@mail.sysu.edu.cn)

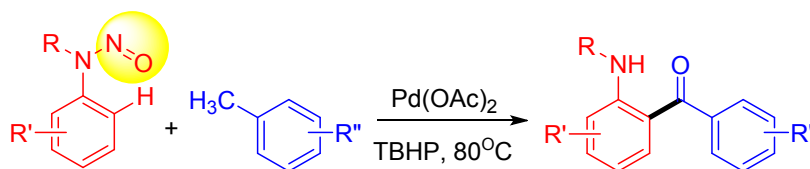

### Table of Contents

---

|                                                                                     |    |
|-------------------------------------------------------------------------------------|----|
| 1. General considerations.....                                                      | 2  |
| 2. Preparation of substituted <i>N</i> -nitrosoanilines substrates .....            | 3  |
| 3. General procedures for reaction condition screenings and coupling reactions..... | 3  |
| 4. Characterization data of coupling products.....                                  | 6  |
| 5. $^1\text{H}$ , $^{13}\text{C}$ , NMR.....                                        | 13 |
| 6. References .....                                                                 | 58 |

## 1. General considerations

Unless otherwise noted, all reagents were purchased from commercial suppliers and used without purification. All the reactions were performed in Rotaflor® (England) resealable screw-cap Schlenk flask (approx. 20 mL volume) in the presence of Teflon coated magnetic stirrer bar (4 mm × 10 mm). 1,2-Dichloroethane (DCE) was distilled under calcium hydride under reduced pressure. Dioxane and toluene were distilled from sodium under nitrogen. The concentration of *tert*-butyl hydroperoxide (TBHP) was determined by means of iodometric method.<sup>1</sup> Thin layer chromatography was performed on Merck precoated silica gel 60 F<sub>254</sub> plates. Silica gel (Merck, 70-230 and 230-400 mesh) was used for column chromatography. <sup>1</sup>H NMR spectra were recorded on a Bruker (400 MHz) spectrometer. Spectra were referenced internally to the residual proton resonance in CDCl<sub>3</sub> (δ 7.26 ppm), or with tetramethylsilane (TMS, δ 0.00 ppm) as the internal standard. Chemical shifts (δ) were reported as part per million (ppm) in δ scale downfield from TMS. <sup>13</sup>C NMR spectra were referenced to CDCl<sub>3</sub> (δ 77.0 ppm, the middle peak). Coupling constants (J) were reported in Hertz (Hz). High-resolution mass spectra (HRMS) were obtained on a Shimadzu LCMS-IT-TOF. GC-MS analysis was conducted on a HP 5973 GCD system using a HP5MS column (30 m × 0.25 mm). The products described in GC yield were accorded to the authentic samples/dodecane calibration standard from HP 6890 GC-FID system. Compounds described in the literatures were characterized by comparison of their <sup>1</sup>H, and/or <sup>13</sup>C NMR spectra to the previously reported data.

## 2. Preparation of substituted N-nitrosoaniline substrates

All the substituted *N*-nitrosoanilides in Table 2 were prepared from their corresponding precursors with NaNO<sub>2</sub> in CH<sub>3</sub>CN/H<sub>2</sub>O according to the literature method without modifications.<sup>2</sup>

## 3. General procedures for reaction condition screenings and coupling reactions

*General procedures for screening the acylation:* The *N*-methyl-*N*-nitrosoaniline (0.137 g, 1.0 mmol) and the metal complex (10 mol% or as indicated in Table 1) were loaded into a Schlenk tube equipped with a Teflon-coated magnetic stir bar under air atmosphere. The toluene (2.0 mL) was added into the tube. The solution was stirred for about 1 to 2 minutes until the solid had been dissolved. TBHP (12.0 mmol or as indicated in Table 1) were loaded into the tube. The tube was stirred at room temperature for ~5 minutes and then placed into a preheated oil bath (40-120 °C) for 24 hours. After completion of reaction, the reaction tube was allowed to cool to room temperature. Ethyl acetate (~10 mL), dodecane (227 μL, internal standard) and water (~3 ml) were added. The organic layer was subjected to GC analysis. The GC yield obtained was previously calibrated by authentic sample/dodecane calibration curve.

*General procedure for C-H bond coupling of steered N-nitrosoaniline and substituted toluene:* Substituted *N*-nitrosoanilide (1.0 mmol) and the Pd(OAc)<sub>2</sub> (22.4 mg, 0.10 mmol) were loaded into a Schlenk tube equipped with a Teflon-coated magnetic stir bar. Substituted Toluene (2.0 mL) was added into the tube (The solid substituted toluene was added to 30 equiv.). TBHP (12.0 mmol) were loaded into the tube. The tube was stirred at room temperature for ~5 minutes and then placed into a preheated

oil bath at 80 °C for 24 hours. After completion of reaction as judged by GC analysis, the reaction tube was allowed to cool to room temperature and quenched with saturated  $K_2CO_3$  and diluted with EtOAc. The organic layer was separated and the aqueous layer was washed with EtOAc. The filtrate was concentrated under reduced pressure. The crude products were purified by flash column chromatography on silica gel (230-400 mesh) to afford the desired oxidatively coupled product.

**Table 1:** Screening of reaction conditions<sup>a</sup>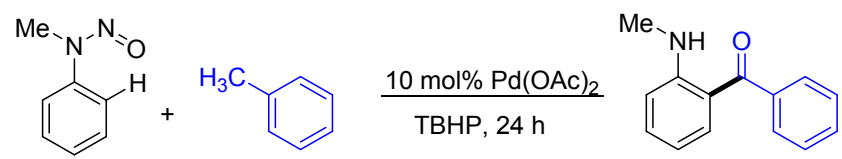

The reaction scheme shows the conversion of N-nitrosoaniline (1a) and toluene to N-(2-methylphenyl)benzamide. The starting material is N-nitrosoaniline (1a), which has a methyl group on the nitrogen and a nitroso group (-N=O) at the 1-position of the benzene ring. The second starting material is toluene (H<sub>3</sub>C-C<sub>6</sub>H<sub>5</sub>). The reaction conditions are 10 mol% Pd(OAc)<sub>2</sub> and TBHP for 24 hours. The product is N-(2-methylphenyl)benzamide, where the nitroso group has been reduced to an amine group (-NH-) and the toluene has been oxidized to a benzamide group (-C(=O)-C<sub>6</sub>H<sub>5</sub>).

| entry           | catalyst                              | oxidant (equiv.)                                 | temp.<br>/°C | %yield <sup>[b]</sup> |
|-----------------|---------------------------------------|--------------------------------------------------|--------------|-----------------------|
| 1               | Pd(OAc) <sub>2</sub>                  | TBHP (6)                                         | 100          | 58                    |
| 2               | PdCl <sub>2</sub>                     | TBHP (6)                                         | 100          | 10                    |
| 3               | Pd(MeCN) <sub>2</sub> Cl <sub>2</sub> | TBHP (6)                                         | 100          | 13                    |
| 4               | Pd(TFA) <sub>2</sub>                  | TBHP (6)                                         | 100          | 45                    |
| 5               | Ni(acac) <sub>2</sub>                 | TBHP (6)                                         | 100          | 0                     |
| 6               | Rh(PPh <sub>3</sub> ) <sub>3</sub> Cl | TBHP (6)                                         | 100          | 0                     |
| 7               | Pd(OAc) <sub>2</sub>                  | air                                              | 100          | 0                     |
| 8               | Pd(OAc) <sub>2</sub>                  | K <sub>2</sub> S <sub>2</sub> O <sub>8</sub> (6) | 100          | 24                    |
| 9               | Pd(OAc) <sub>2</sub>                  | PhI(OAc) <sub>2</sub> (6)                        | 100          | 0                     |
| 10              | Pd(OAc) <sub>2</sub>                  | ( <i>t</i> -BuO) <sub>2</sub> (6)                | 100          | 15                    |
| 11              | Pd(OAc) <sub>2</sub>                  | TBHP (8)                                         | 100          | 69                    |
| 12              | Pd(OAc) <sub>2</sub>                  | TBHP (10)                                        | 100          | 75                    |
| 13              | Pd(OAc) <sub>2</sub>                  | TBHP (12)                                        | 100          | 76                    |
| 14              | Pd(OAc) <sub>2</sub>                  | TBHP (16)                                        | 100          | 69                    |
| <b>15</b>       | <b>Pd(OAc)<sub>2</sub></b>            | <b>TBHP (12)</b>                                 | <b>80</b>    | <b>85(81)</b>         |
| 16              | Pd(OAc) <sub>2</sub>                  | TBHP (12)                                        | 60           | 53                    |
| 17              | Pd(OAc) <sub>2</sub>                  | TBHP (12)                                        | 40           | 36                    |
| 18 <sup>c</sup> | Pd(OAc) <sub>2</sub>                  | TBHP (12)                                        | 80           | 57                    |
| 19 <sup>d</sup> | Pd(OAc) <sub>2</sub>                  | TBHP (12)                                        | 80           | 33                    |
| 20 <sup>e</sup> | Pd(OAc) <sub>2</sub>                  | TBHP (12)                                        | 80           | 72                    |

<sup>a</sup> Reaction conditions: *N*-nitrosoaniline **1a** (1.0 mmol), catalyst (10 mol%), oxidant (as indicated), toluene (2 mL) were stirred at indicated reaction temperature for 24 h under air. <sup>b</sup>Calibrated GC yields were reported using dodecane as the internal standard. Isolated yield in parenthesis. <sup>c</sup>DCE as solvent (toluene, 10 equiv.). <sup>d</sup>Dioxane as solvent (toluene,

10 equiv.). <sup>e</sup>trifluoromethylbenzene as solvent (toluene, 10 equiv.).

#### 4. Characterization data of coupling products

##### (2-(methylamino)phenyl)(phenyl)methanone (3ab)

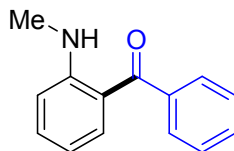

Hexane: EtOAc (50:1);  $R_f = 0.4$ ;  $^1\text{H NMR}$  (400 MHz,  $\text{CDCl}_3$ )  $\delta$  8.56 (brs, 1H), 7.63-7.60 (m, 2H), 7.53-7.48 (m, 3H), 7.46 (t,  $J = 4.2$  Hz, 2H), 7.43 (s, 1H), 6.79 (d,  $J = 8.5$  Hz, 1H), 6.60 – 6.52 (m, 1H), 3.00 (d,  $J = 5.0$  Hz, 3H).  $^{13}\text{C NMR}$  ( $\text{CDCl}_3$ , 100 MHz):  $\delta$  199.39, 152.74, 140.60, 135.54, 134.95, 130.74, 129.07, 128.02, 117.27, 113.61, 111.10, 29.53.

##### (2-(methylamino)phenyl)(naphthalen-1-yl)methanone (3ac)

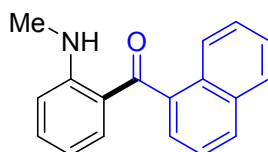

Hexane: EtOAc (50:1);  $R_f = 0.4$ ;  $^1\text{H NMR}$  (400 MHz,  $\text{CDCl}_3$ )  $\delta$  9.07 (brs, 1H), 7.90 (dd,  $J = 14.0, 7.8$  Hz, 2H), 7.84-7.79 (m, 1H), 7.51-7.46 (m, 2H), 7.45-7.38 (m, 3H), 7.27-7.22 (m, 1H), 6.78 (d,  $J = 8.3$  Hz, 1H), 6.39 (s, 1H), 3.04 (d,  $J = 5.1$  Hz, 3H).  $^{13}\text{C NMR}$  (101 MHz,  $\text{CDCl}_3$ )  $\delta$  200.42, 152.96, 138.77, 136.05, 135.69, 133.56, 129.45, 128.26, 126.71, 126.21, 125.73, 125.31, 124.67, 118.16, 113.84, 111.09, 29.41.

##### (2-(methylamino)phenyl)(p-tolyl)methanone (3ad)

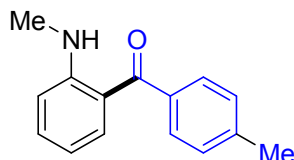

Hexane: EtOAc (50:1);  $R_f = 0.4$ ;  $^1\text{H NMR}$  (400 MHz,  $\text{CDCl}_3$ )  $\delta$  8.41 (brs, 1H), 7.51 (d,  $J = 8.2$  Hz, 3H), 7.39 (ddd,  $J = 8.6, 7.1, 1.6$  Hz, 1H), 7.24 (d,  $J = 7.8$  Hz, 2H), 6.75 (d,  $J = 8.7$  Hz, 1H), 6.56-6.50 (m, 1H), 2.95 (d,  $J = 4.8$  Hz, 3H), 2.42 (s, 3H).  $^{13}\text{C NMR}$  (101 MHz,  $\text{CDCl}_3$ )  $\delta$  199.14, 152.56, 141.20, 137.78, 135.32, 134.78, 129.27, 128.67,

117.32, 113.57, 111.02, 29.42, 21.36.

**(2-(methylamino)phenyl)(o-tolyl)methanone (3ae)**

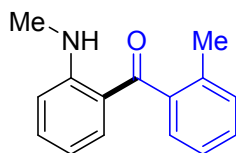

Hexane: EtOAc (50:1);  $R_f = 0.4$ ;  $^1\text{H NMR}$  (400 MHz,  $\text{CDCl}_3$ )  $\delta$  8.79 (brs, 1H), 7.45 (dd,  $J = 8.0, 1.5$  Hz, 1H), 7.45-7.30 (m, 3H), 7.26-7.30 (m, 1H), 7.16-7.12 (m, 1H), 7.03 (t, 1H), 6.67 (d,  $J = 8.4$  Hz, 1H), 6.44 (ddd,  $J = 8.0, 7.2, 1.0$  Hz, 1H), 2.91 (d,  $J = 5.5$  Hz, 3H), 2.42 (s, 3H).  $^{13}\text{C NMR}$  (101 MHz,  $\text{CDCl}_3$ )  $\delta$  199.99, 152.51, 140.72, 137.93, 135.49, 134.46, 129.34, 127.85, 125.64, 117.15, 113.55, 110.96, 29.37, 20.39.

**(2-(methylamino)phenyl)(m-tolyl)methanone (3af)**

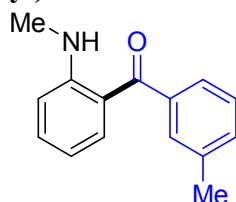

Hexane: EtOAc (50:1);  $R_f = 0.4$ ;  $^1\text{H NMR}$  (400 MHz,  $\text{CDCl}_3$ )  $\delta$  8.56 (brs, 1H), 7.52 (dd,  $J = 8.0, 1.5$  Hz, 1H), 7.45-7.39 (m, 3H), 7.34 (ddd,  $J = 5.5, 3.5, 1.1$  Hz, 2H), 6.79 (d,  $J = 8.4$  Hz, 1H), 6.57 (ddd,  $J = 8.0, 7.2, 1.0$  Hz, 1H), 3.00 (d,  $J = 5.1$  Hz, 3H), 2.44 (s, 3H).  $^{13}\text{C NMR}$  (101 MHz,  $\text{CDCl}_3$ )  $\delta$  199.61, 152.70, 140.67, 137.84, 135.53, 134.97, 131.39, 129.40, 127.85, 126.14, 117.39, 113.61, 111.05, 29.45, 21.38.

**(4-methoxyphenyl)(2-(methylamino)phenyl)methanone (3ag)**

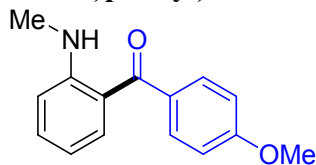

Hexane: EtOAc (10:1);  $R_f = 0.25$ ;  $^1\text{H NMR}$  (400 MHz,  $\text{CDCl}_3$ )  $\delta$  8.20 (brs, 1H), 7.66-7.59 (m, 2H), 7.49 (dd,  $J = 7.9, 1.5$  Hz, 1H), 7.39 (ddd,  $J = 8.6, 7.1, 1.6$  Hz, 1H), 6.97-6.91 (m, 2H), 6.74 (d,  $J = 8.4$  Hz, 1H), 6.58-6.52 (m, 1H), 3.87 (s, 3H), 2.94 (d,  $J = 4.7$  Hz, 3H).  $^{13}\text{C NMR}$  (101 MHz,  $\text{CDCl}_3$ )  $\delta$  198.14, 162.03, 152.31, 134.91, 134.50, 132.89, 131.55, 117.91, 113.60, 113.32, 111.01, 55.41, 29.50.

**(3-methoxyphenyl)(2-(methylamino)phenyl)methanone (3ah)**

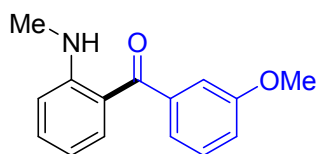

Hexane: EtOAc (10:1);  $R_f = 0.35$ ;  $^1\text{H NMR}$  (400 MHz,  $\text{CDCl}_3$ )  $\delta$  8.56 (brs, 1H), 7.56-7.30 (m, 3H), 7.20-6.99 (m, 3H), 6.78 (d,  $J = 8.4$  Hz, 1H), 6.55 (d,  $J = 7.0$  Hz, 1H), 3.86 (s, 3H), 2.99 (s, 3H).  $^{13}\text{C NMR}$  (101 MHz,  $\text{CDCl}_3$ )  $\delta$  199.04, 159.34, 152.75, 141.95, 135.49, 135.11, 129.02, 121.45, 117.18, 116.77, 113.77, 113.66, 111.09, 55.40, 29.45.

**(2-fluorophenyl)(2-(methylamino)phenyl)methanone (3ai)**

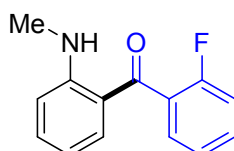

Hexane: EtOAc (50:1);  $R_f = 0.4$ ;  $^1\text{H NMR}$  (400 MHz,  $\text{CDCl}_3$ )  $\delta$  8.90 (brs, 1H), 7.47 (ddd,  $J = 7.4, 2.5, 1.5$  Hz, 1H), 7.45-7.39 (m, 2H), 7.39-7.34 (m, 1H), 7.25 (td,  $J = 7.5, 1.0$  Hz, 1H), 7.20-7.14 (m, 1H), 6.78 (d,  $J = 8.5$  Hz, 1H), 6.55 (ddd,  $J = 8.0, 7.1, 1.0$  Hz, 1H), 3.02 (d,  $J = 5.1$  Hz, 3H).  $^{13}\text{C NMR}$  (101 MHz,  $\text{CDCl}_3$ )  $\delta$  195.25, 152.82, 135.80, 135.38, 131.40 (d,  $J = 8.0$  Hz, 18H), 129.60 (d,  $J = 3.5$  Hz, 16H), 124.06 (d,  $J = 3.5$  Hz, 13H), 117.38, 116.08, 115.87, 114.01, 111.14, 29.35.

**(4-chlorophenyl)(2-(methylamino)phenyl)methanone (3aj)**

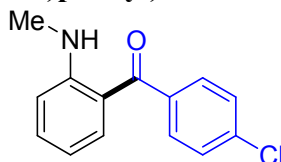

Hexane: EtOAc (50:1);  $R_f = 0.3$ ;  $^1\text{H NMR}$  (400 MHz,  $\text{CDCl}_3$ )  $\delta$  8.48 (brs, 1H), 7.54 (d,  $J = 8.4$  Hz, 2H), 7.44-7.37 (m, 4H), 6.75 (d,  $J = 9.0$  Hz, 1H), 6.53 (t,  $J = 7.5$  Hz, 1H), 2.96 (d,  $J = 5.0$  Hz, 3H).  $^{13}\text{C NMR}$  (101 MHz,  $\text{CDCl}_3$ )  $\delta$  197.87, 152.76, 138.89, 136.93, 135.26, 135.12, 130.43, 128.33, 116.93, 113.74, 111.25, 29.45.



**(4-bromophenyl)(2-(methylamino)phenyl)methanone (3ak)**

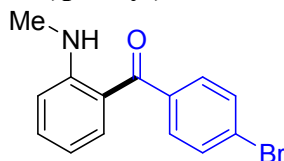

Hexane: EtOAc (50:1);  $R_f = 0.4$ ;  $^1\text{H NMR}$  (400 MHz,  $\text{CDCl}_3$ )  $\delta$  8.50 (brs, 1H), 7.60-7.55 (m, 2H), 7.48-7.44 (m, 2H), 7.44-7.39 (m, 2H), 6.75 (d,  $J = 8.4$  Hz, 1H), 6.53 (dd,  $J = 8.0, 7.1$  Hz, 1H), 2.96 (dd,  $J = 5.1, 2.1$  Hz, 3H).  $^{13}\text{C NMR}$  (101 MHz,  $\text{CDCl}_3$ )  $\delta$  197.94, 152.74, 139.35, 135.30, 135.04, 131.30, 130.55, 125.33, 116.87, 113.76, 111.27, 29.45.

**(3-bromophenyl)(2-(methylamino)phenyl)methanone (3al)**

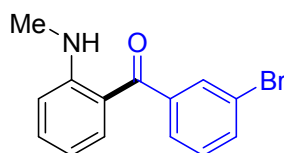

Hexane: EtOAc (50:1);  $R_f = 0.3$ ;  $^1\text{H NMR}$  (400 MHz,  $\text{CDCl}_3$ )  $\delta$  8.54 (brs, 1H), 7.72 (t,  $J = 1.7$  Hz, 1H), 7.62 (ddd,  $J = 8.0, 2.0, 1.1$  Hz, 1H), 7.48 (dd,  $J = 5.0, 3.6$  Hz, 1H), 7.43-7.39 (m, 2H), 7.30 (d,  $J = 7.8$  Hz, 1H), 6.76 (d,  $J = 8.9$  Hz, 1H), 6.57-6.52 (m, 1H), 2.97 (d,  $J = 5.0$  Hz, 3H).  $^{13}\text{C NMR}$  (101 MHz,  $\text{CDCl}_3$ )  $\delta$  197.34, 152.87, 142.52, 135.44, 135.24, 133.48, 131.67, 129.61, 127.39, 122.27, 116.63, 113.82, 111.26, 29.43.

**(2-(methylamino)phenyl)(4-(trifluoromethyl)phenyl)methanone (3am)**

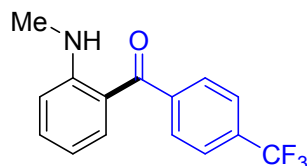

Hexane: EtOAc (50:1);  $R_f = 0.4$ ;  $^1\text{H NMR}$  (400 MHz,  $\text{CDCl}_3$ )  $\delta$  8.68 (brs, 1H), 7.72 (dd,  $J = 16.9, 7.8$  Hz, 3H), 7.51-7.35 (m, 2H), 6.81 (d,  $J = 8.5$  Hz, 1H), 6.57 (t,  $J = 7.1$  Hz, 1H), 3.06-2.69 (d, 3H).  $^{13}\text{C NMR}$  (101 MHz,  $\text{CDCl}_3$ )  $\delta$  197.78, 153.01, 143.94, 135.64, 135.28, 129.98, 128.97, 125.11 (d,  $J = 3.7$  Hz, 10H), 116.52, 113.85, 111.37,

29.41.

**(2-(ethylamino)phenyl)(phenyl)methanone (3bb)**

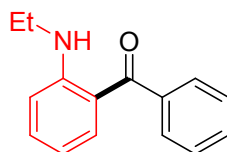

Hexane: EtOAc (50:1);  $R_f = 0.4$ ;  $^1\text{H NMR}$  (400 MHz,  $\text{CDCl}_3$ )  $\delta$  8.55 (brs, 1H), 7.65–7.61 (m, 2H), 7.52 (dd,  $J = 2.2, 1.6$  Hz, 1H), 7.51–7.44 (m, 3H), 7.41 (ddd,  $J = 8.6, 7.1, 1.6$  Hz, 1H), 6.80 (d,  $J = 8.5$  Hz, 1H), 6.55 (ddd,  $J = 8.0, 7.1, 1.0$  Hz, 1H), 3.33 (dd,  $J = 7.1, 4.6$  Hz, 2H), 1.39 (t,  $J = 7.2$  Hz, 3H).  $^{13}\text{C NMR}$  (101 MHz,  $\text{CDCl}_3$ )  $\delta$  199.31, 151.84, 140.65, 135.55, 135.00, 130.66, 128.98, 128.02, 117.03, 113.54, 111.52, 37.36, 14.49.

**(2-(butylamino)phenyl)(phenyl)methanone (3cb)**

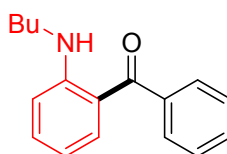

Hexane: EtOAc (50:1);  $R_f = 0.4$ ;  $^1\text{H NMR}$  (400 MHz,  $\text{CDCl}_3$ )  $\delta$  8.63 (brs, 1H), 7.70–7.56 (m, 2H), 7.55–7.48 (m, 3H), 7.45–7.28 (m, 2H), 6.78 (d,  $J = 8.4$  Hz, 1H), 6.51 (ddd,  $J = 8.1, 7.1, 1.1$  Hz, 1H), 3.27 (td,  $J = 7.0, 5.2$  Hz, 2H), 1.79–1.66 (m, 2H), 1.58–1.44 (m, 2H), 0.99 (t,  $J = 7.3$  Hz, 3H).  $^{13}\text{C NMR}$  (101 MHz,  $\text{CDCl}_3$ )  $\delta$  199.67, 152.24, 140.79, 135.79, 135.17, 130.80, 129.11, 128.11, 117.09, 113.56, 111.64, 42.59, 31.37, 20.52, 13.95.

**(2-(benzylamino)phenyl)(phenyl)methanone (3db)**

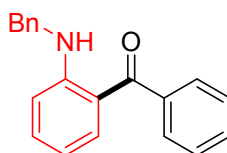

Hexane: EtOAc (50:1);  $R_f = 0.4$ ;  $^1\text{H NMR}$  (400 MHz,  $\text{CDCl}_3$ ):  $\delta$  9.00 (brs, 1H), 7.63–7.60 (m, 2H), 7.53–7.25 (m, 11H), 6.72 (d,  $J = 9.0$  Hz, 1H), 6.57–6.53 (m, 1H), 4.50 (d,  $J = 5.0$  Hz, 2H);  $^{13}\text{C NMR}$  (101 MHz,  $\text{CDCl}_3$ )  $\delta$  199.51, 151.27, 140.04, 138.67, 135.65, 135.02, 130.94, 129.20, 128.93, 128.24, 127.38, 127.21, 117.61, 114.22,

112.71,47.21.

**(5-methyl-2-(methylamino)phenyl)(phenyl)methanone (3eb)**

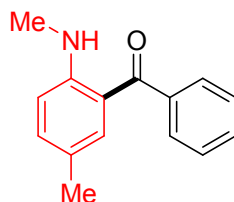

Hexane: EtOAc (50:1);  $R_f = 0.4$ ;  $^1\text{H NMR}$  (400 MHz,  $\text{CDCl}_3$ )  $\delta$  8.37 (brs, 1H), 7.65 – 7.59 (m, 2H), 7.53 (d,  $J = 7.2$  Hz, 1H), 7.50 – 7.45 (m, 2H), 7.27 (dd,  $J = 11.2, 2.5$  Hz, 2H), 6.73 (d,  $J = 8.5$  Hz, 1H), 2.98 (d,  $J = 3.3$  Hz, 3H), 2.20 (s, 3H).  $^{13}\text{C NMR}$  (101 MHz,  $\text{CDCl}_3$ )  $\delta$  199.20, 150.91, 140.76, 136.20, 135.02, 130.57, 128.94, 128.01, 122.48, 117.18, 111.22, 29.58, 20.20.

**(5-bromo-2-(methylamino)phenyl)(phenyl)methanone (3fb)**

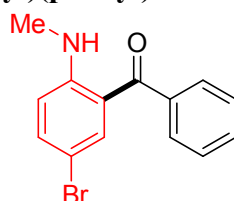

Hexane: EtOAc (50:1);  $R_f = 0.4$ ;  $^1\text{H NMR}$  (400 MHz,  $\text{CDCl}_3$ ):  $\delta$  8.47 (brs, 1H), 7.58-7.55 (m, 3H), 7.54 -7.49 (m, 1H), 7.47 -7.42 (m, 3H), 6.62 (d,  $J = 9.0$  Hz, 1H), 2.94(d,  $J = 4.9$  Hz, 3H);  $^{13}\text{C NMR}$  (101 MHz,  $\text{CDCl}_3$ )  $\delta$  198.20, 151.16, 139.72, 137.53, 137.07, 131.01, 129.02, 128.34, 118.78, 113.24, 105.06, 29.44.

**(5-chloro-2-(methylamino)phenyl)(phenyl)methanone (3gb)**

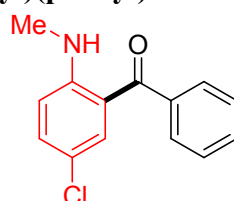

Hexane: EtOAc (50:1);  $R_f = 0.4$ ;  $^1\text{H NMR}$  (400 MHz,  $\text{CDCl}_3$ )  $\delta$  8.45 (brs, 1H), 7.57 (t,  $J = 8.6$  Hz, 2H), 7.52 (d,  $J = 7.2$  Hz, 1H), 7.49 – 7.39 (m, 3H), 7.34 (dd,  $J = 9.0, 2.3$  Hz, 1H), 6.70 (d,  $J = 9.0$  Hz, 1H), 2.95(d,  $J = 4.9$  Hz, 3H).  $^{13}\text{C NMR}$  (101 MHz,

CDCl<sub>3</sub>)  $\delta$  198.31, 151.19, 139.83, 134.86, 134.04, 131.12, 128.93, 128.25, 118.27, 117.93, 112.72, 29.59.

**(5-fluoro-2-(methylamino)phenyl)(phenyl)methanone (3hb)**

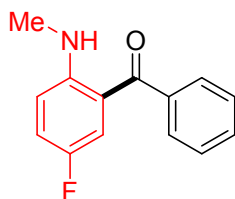

Hexane: EtOAc (50:1);  $R_f = 0.4$ ; <sup>1</sup>H NMR (400 MHz, CDCl<sub>3</sub>)  $\delta$  8.30 (brs, 1H), 7.64 – 7.56 (m, 2H), 7.51 (d,  $J = 7.4$  Hz, 1H), 7.46 (d,  $J = 7.5$  Hz, 2H), 7.22 – 7.14 (m, 2H), 6.70 (dd,  $J = 10.0, 4.3$  Hz, 1H), 2.95 (d,  $J = 4.9$  Hz, 3H). <sup>13</sup>C NMR (101 MHz, CDCl<sub>3</sub>) 198.24, 153.33, 151.01, 149.55, 139.93, 131.05, 122.81 (d,  $J = 23.0$  Hz), 122.93, 122.70, 119.87 (d,  $J = 22.5$  Hz), 112.24 (d,  $J = 6.9$  Hz), 29.78.

**(2-(methylamino)-5-(trifluoromethyl)phenyl)(phenyl)methanone (3ib)**

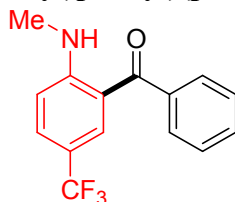

Hexane: EtOAc (50:1);  $R_f = 0.4$ ; <sup>1</sup>H NMR (400 MHz, CDCl<sub>3</sub>)  $\delta$  8.85 (brs, 1H), 7.78 (d,  $J = 1.1$  Hz, 1H), 7.65 – 7.59 (m, 3H), 7.57 (dd,  $J = 5.2, 3.7$  Hz, 1H), 7.50 (ddd,  $J = 6.6, 4.4, 1.3$  Hz, 2H), 6.84 (d,  $J = 9.0$  Hz, 1H), 3.03 (d,  $J = 5.1$  Hz, 3H). <sup>13</sup>C NMR (101 MHz, CDCl<sub>3</sub>)  $\delta$  198.74, 154.30, 139.57, 132.65 (d,  $J = 4.0$  Hz), 131.38, 130.19 (d,  $J = 4.0$  Hz), 129.00, 128.33, 118.40, 116.21, 111.38, 29.49.

**(4-methyl-2-(methylamino)phenyl)(phenyl)methanone(3jb)**

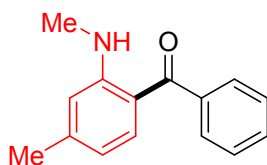

Hexane: EtOAc (50:1);  $R_f = 0.4$ ; <sup>1</sup>H NMR (400 MHz, CDCl<sub>3</sub>)  $\delta$  8.62 (brs, 1H), 7.56 (dd,  $J = 8.1, 1.5$  Hz, 2H), 7.47 (d,  $J = 7.2$  Hz, 1H), 7.43 (dd,  $J = 5.9, 1.4$  Hz, 2H), 7.36 (d,  $J = 8.2$  Hz, 1H), 6.55 (s, 1H), 6.35 (dd,  $J = 8.2, 1.1$  Hz, 1H), 2.96 (d,  $J = 4.2$  Hz,

3H), 2.34 (s, 3H).<sup>13</sup>C NMR (101 MHz, CDCl<sub>3</sub>) δ 198.81, 152.98, 146.17, 140.90, 135.63, 130.39, 128.80, 127.97, 115.15, 111.20, 29.40, 22.29.

**phenyl(2-(phenylamino)phenyl)methanone (3lb)**

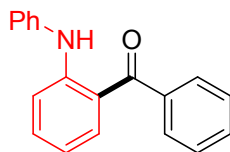

Hexane: EtOAc (50:1); R<sub>f</sub> = 0.4; <sup>1</sup>H NMR (400 MHz, CDCl<sub>3</sub>): δ 10.12 (brs, 1H), 7.72-7.71 (m, 2H), 7.57-7.55 (m, 2H), 7.49-7.46 (m, 2H), 7.39-7.38 (m, 2H), 7.36-7.33 (m, 2H), 7.32-7.29 (m, 2H), 7.10 (ddt, J = 7.4, 7.1, 1.3 Hz, 1H), 6.71 (ddd, J = 8.1, 6.6, 1.5 Hz, 1H). (101 MHz, CDCl<sub>3</sub>) δ 199.17, 148.02, 140.52, 139.78, 134.99, 134.21, 131.37, 129.41, 129.38, 128.13, 123.51, 122.18, 119.71, 116.54, 114.61.

## 5. $^1\text{H}$ and $^{13}\text{C}$ NMR

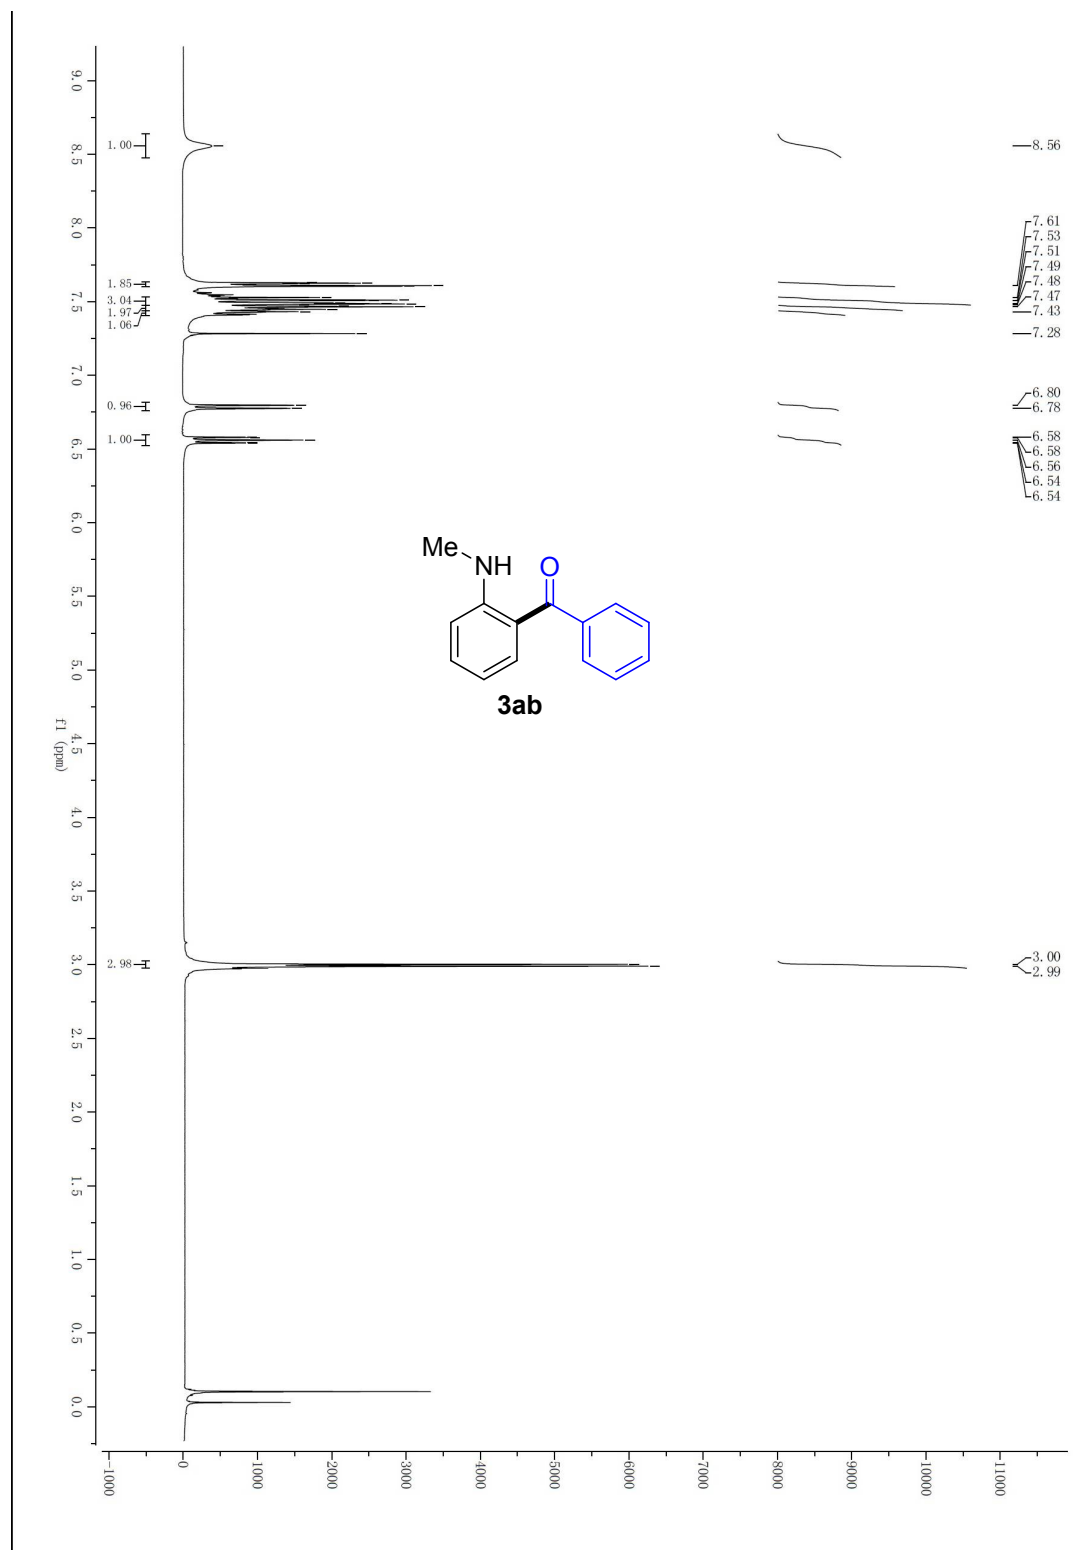

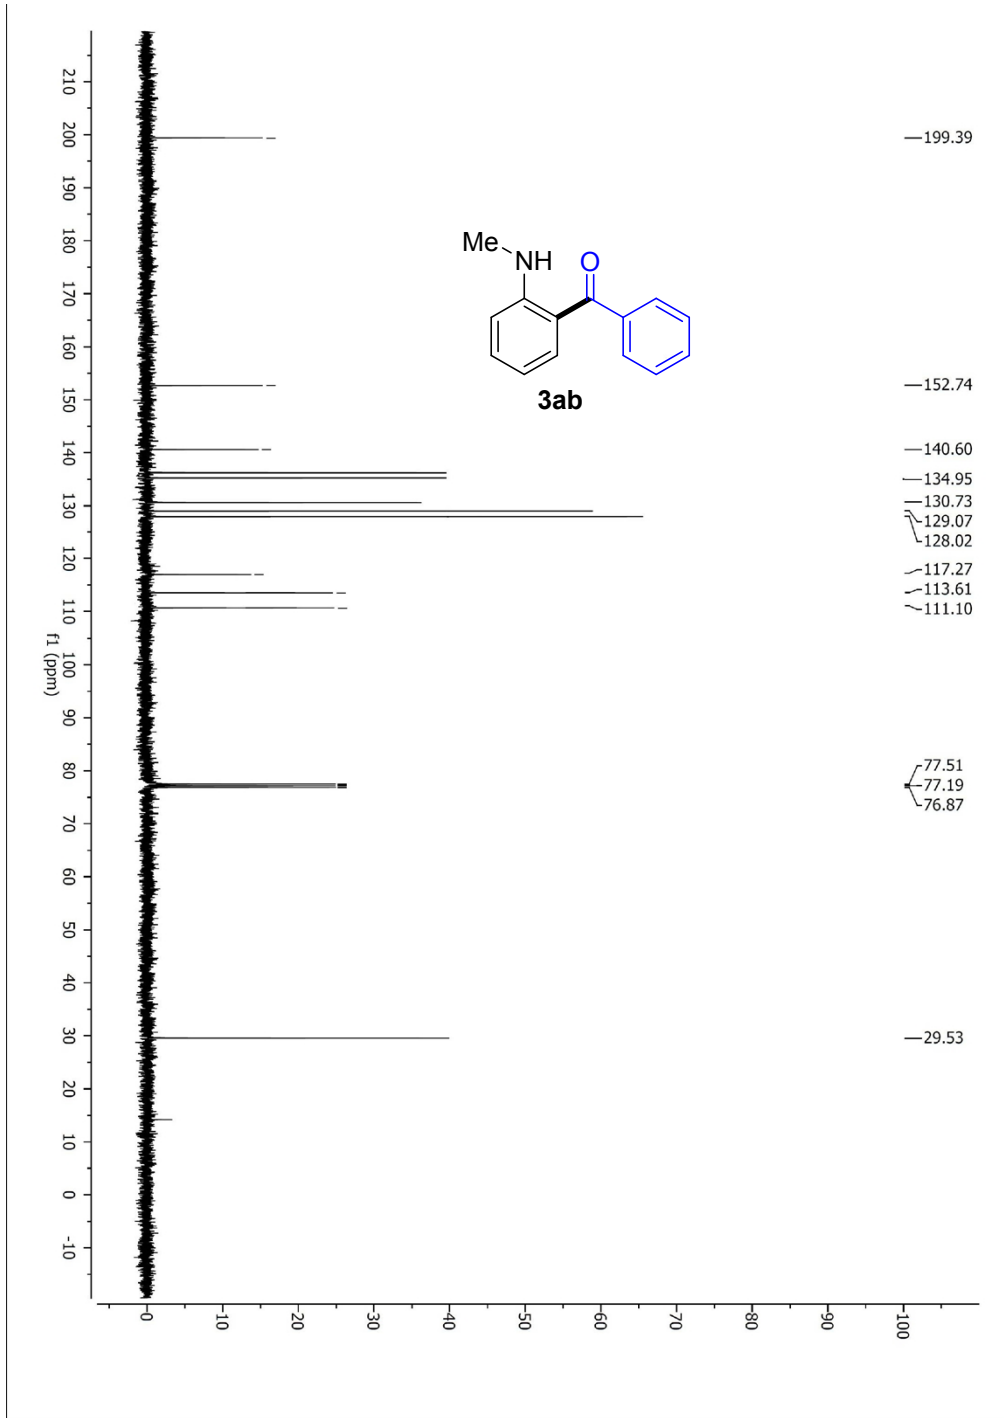

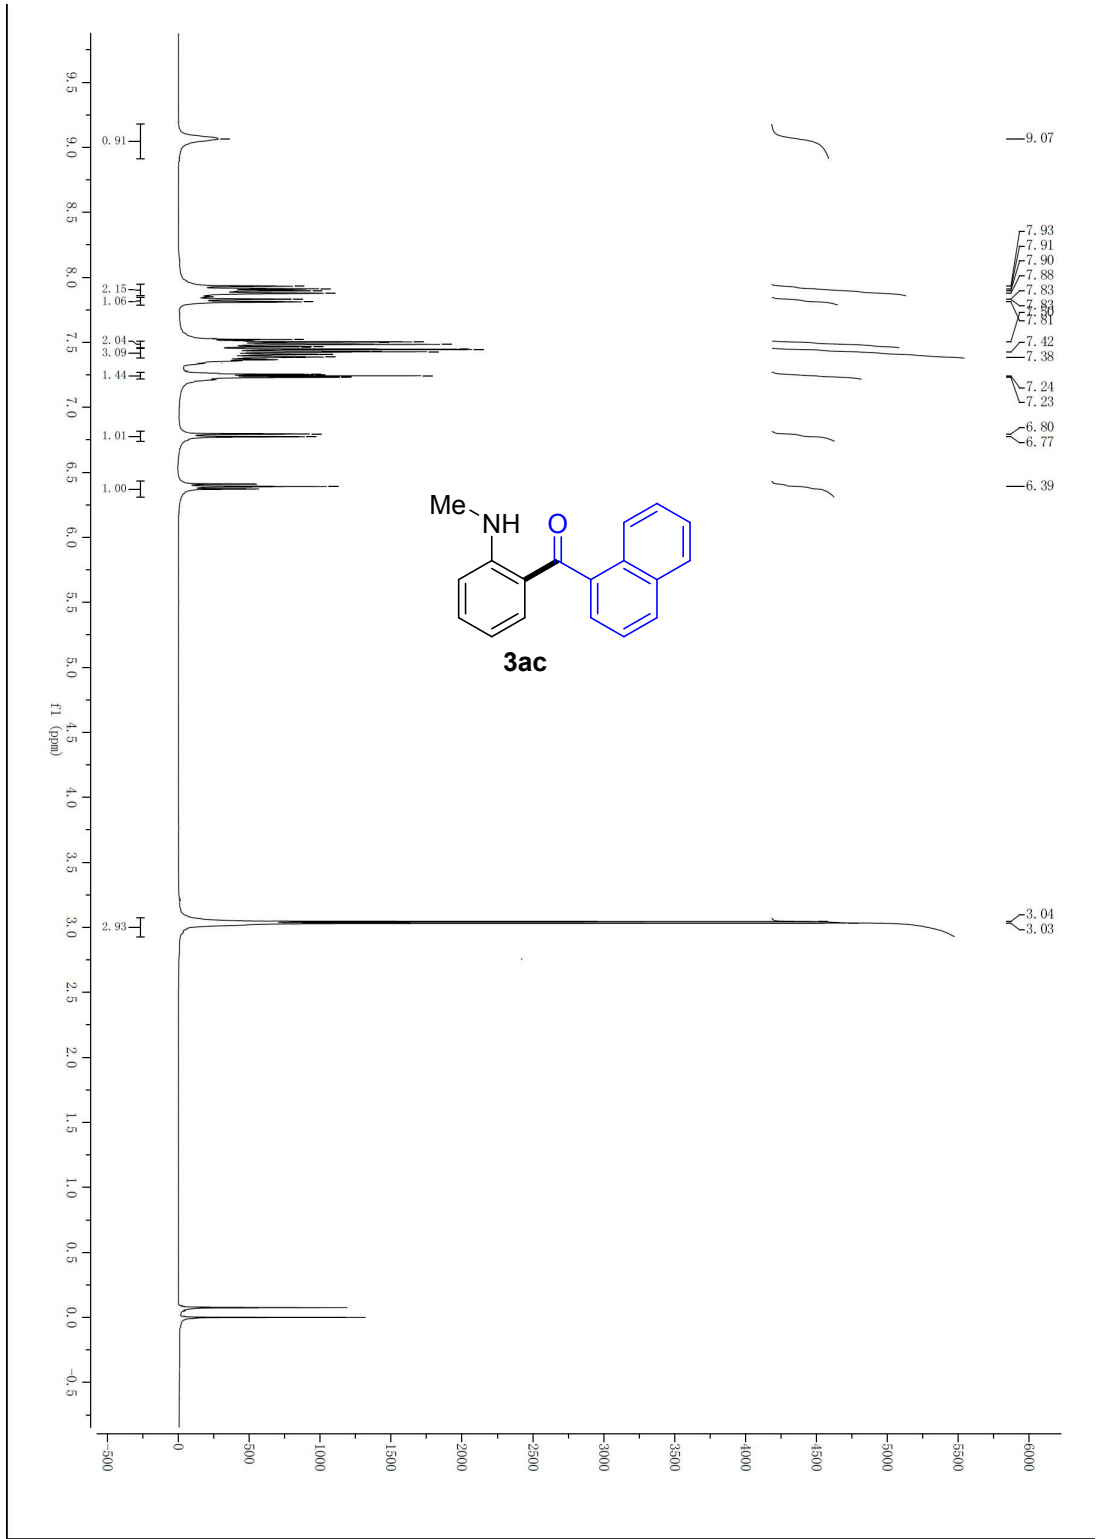



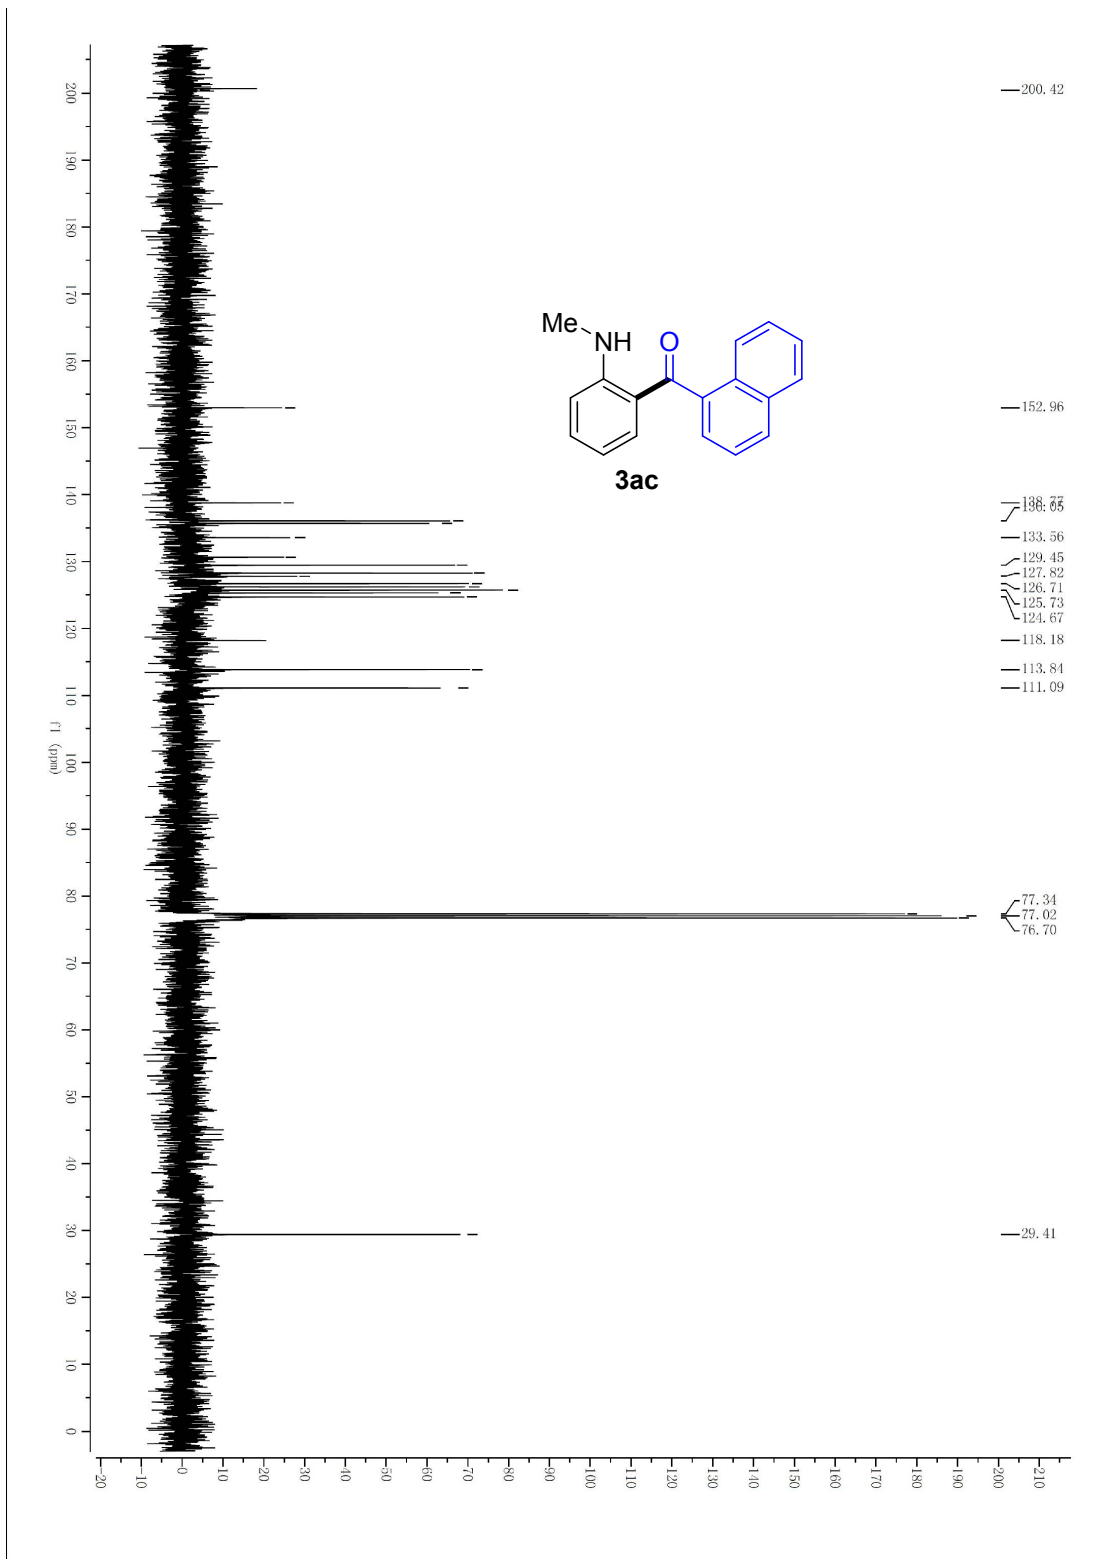

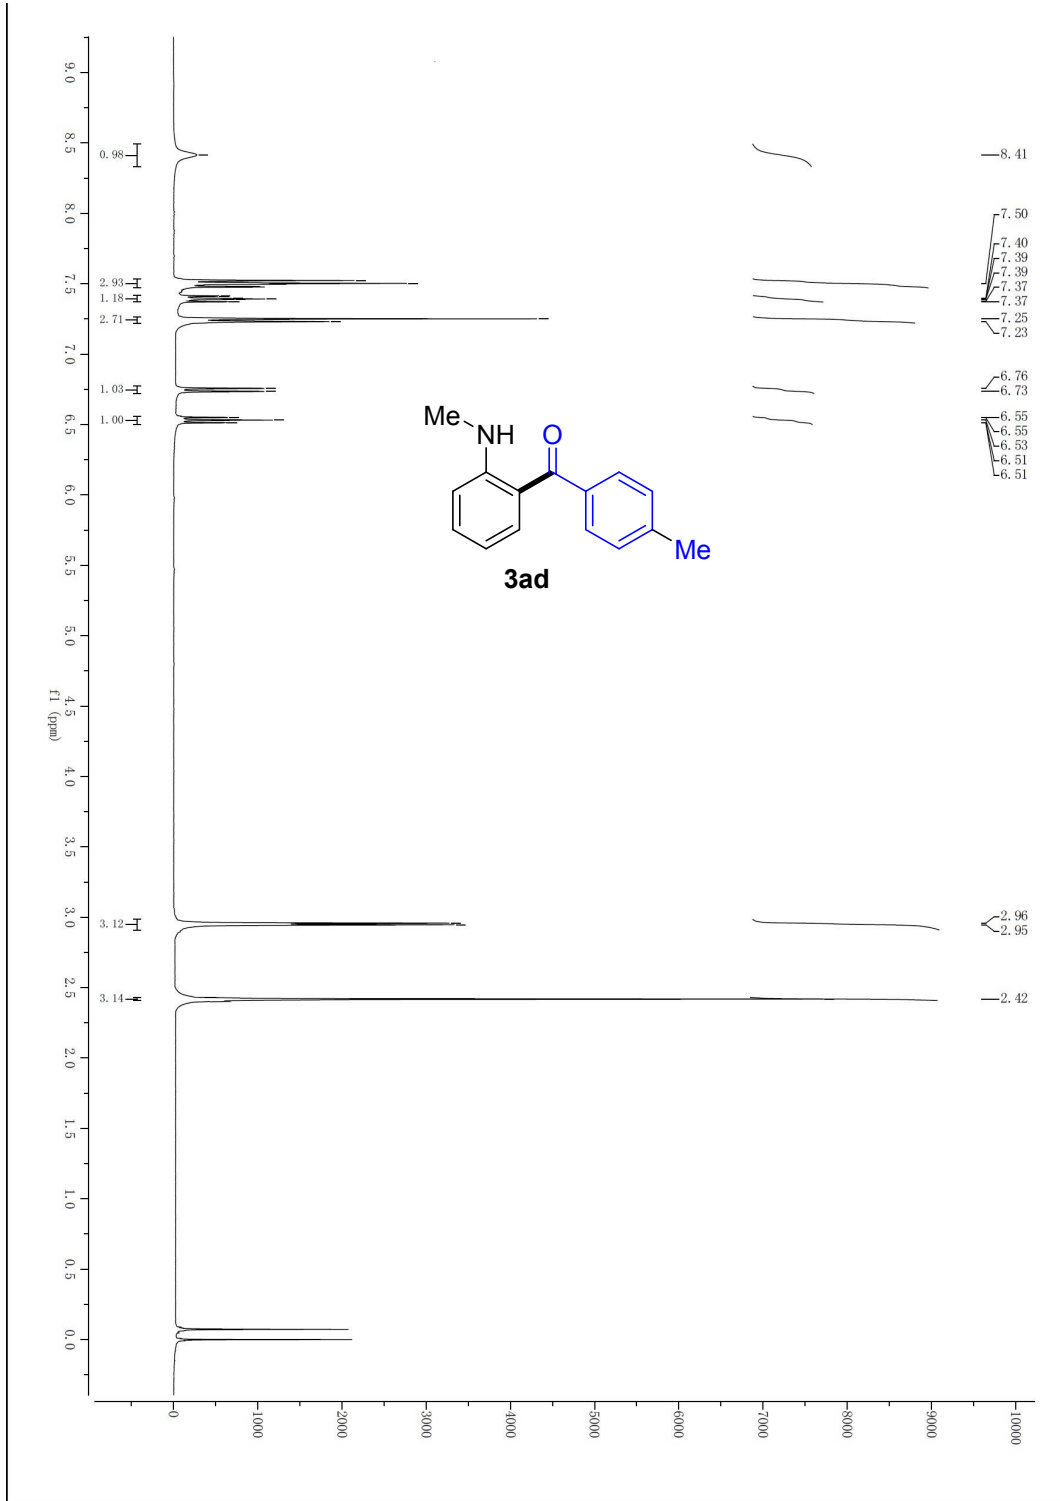

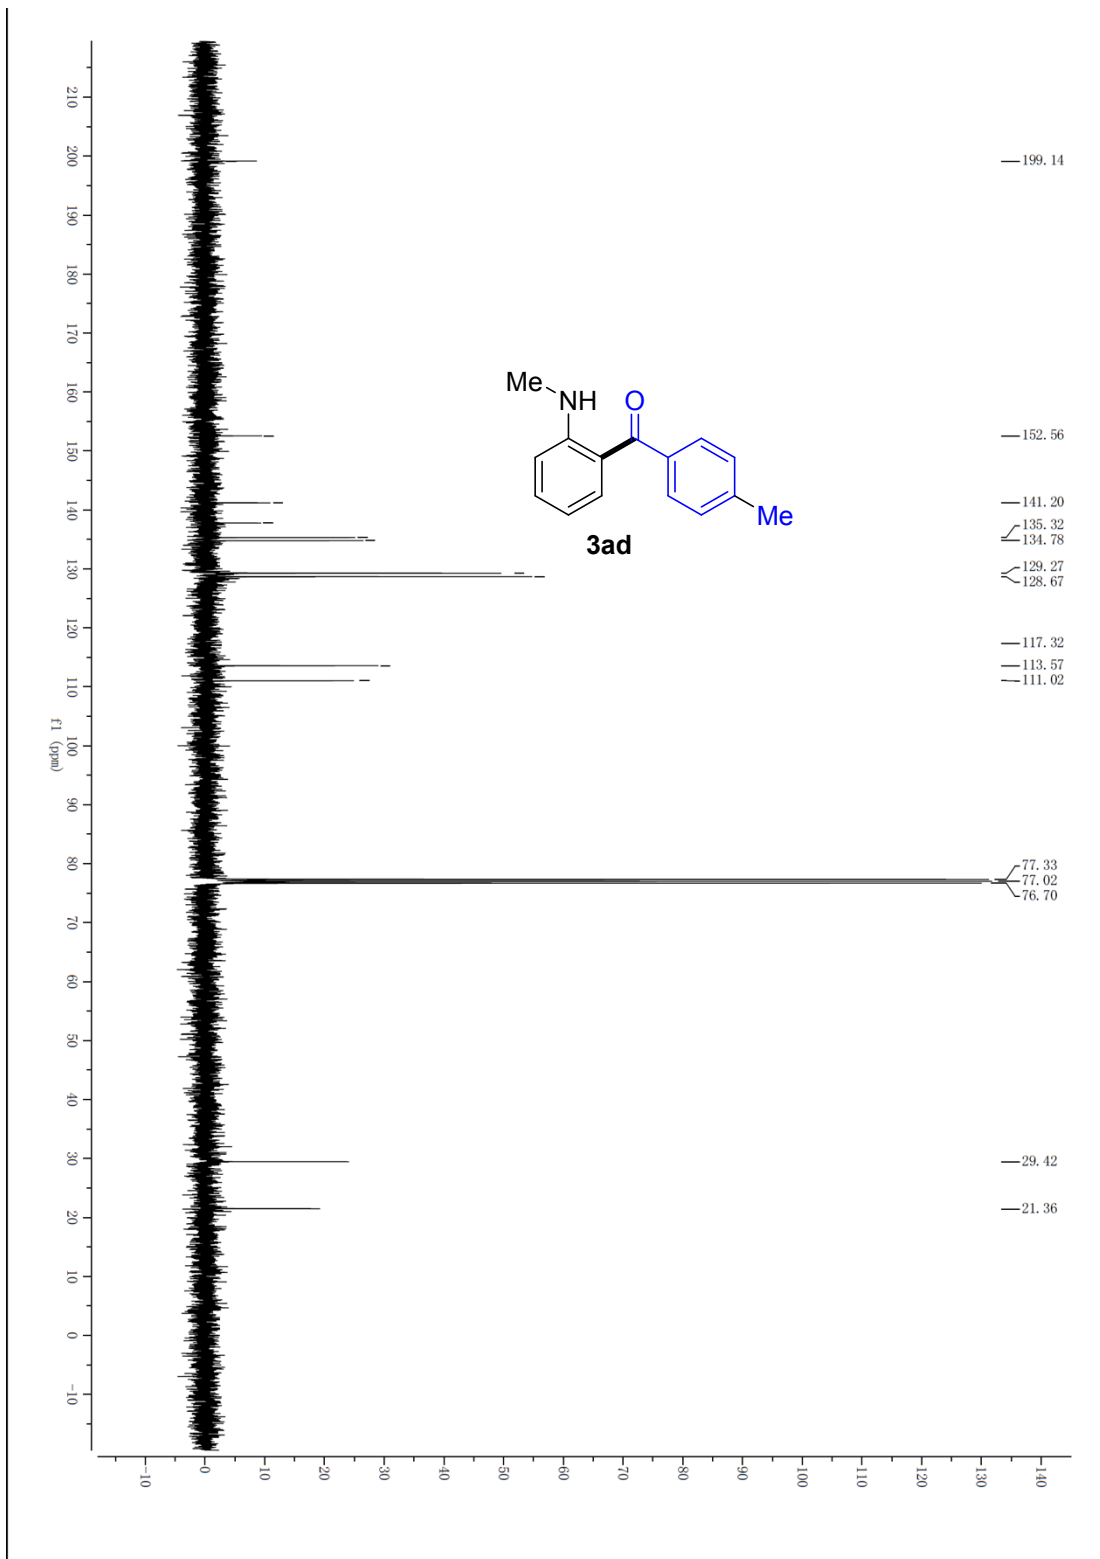

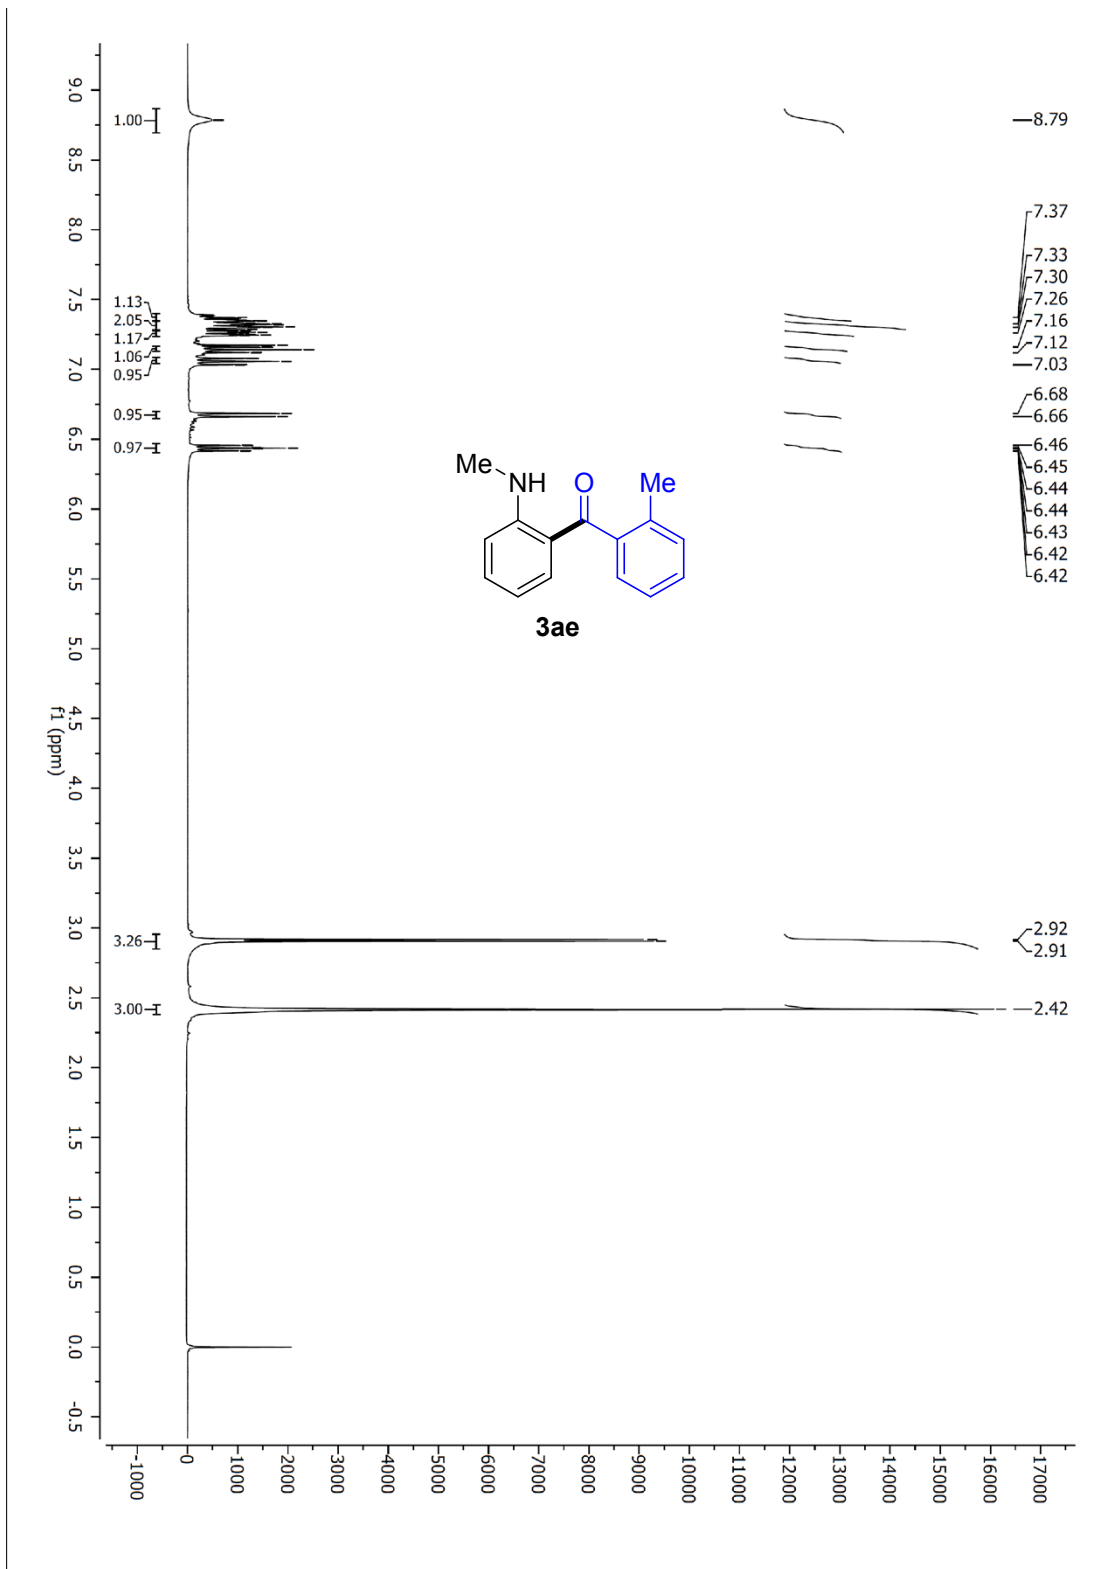

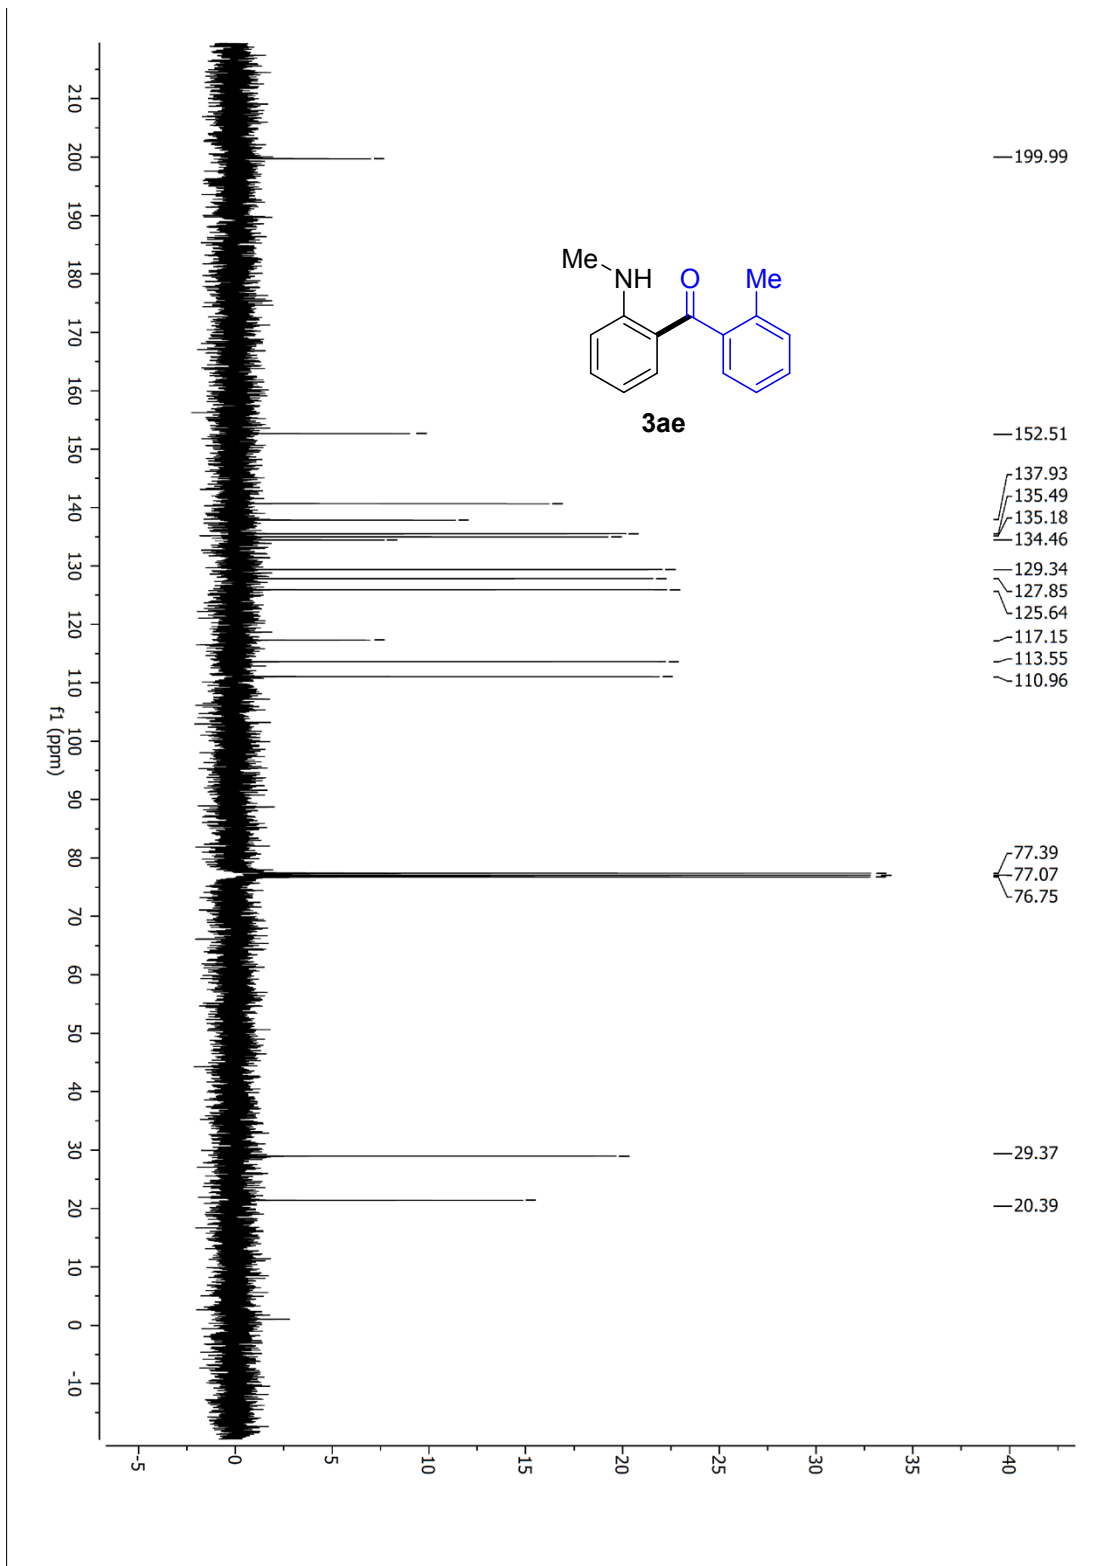

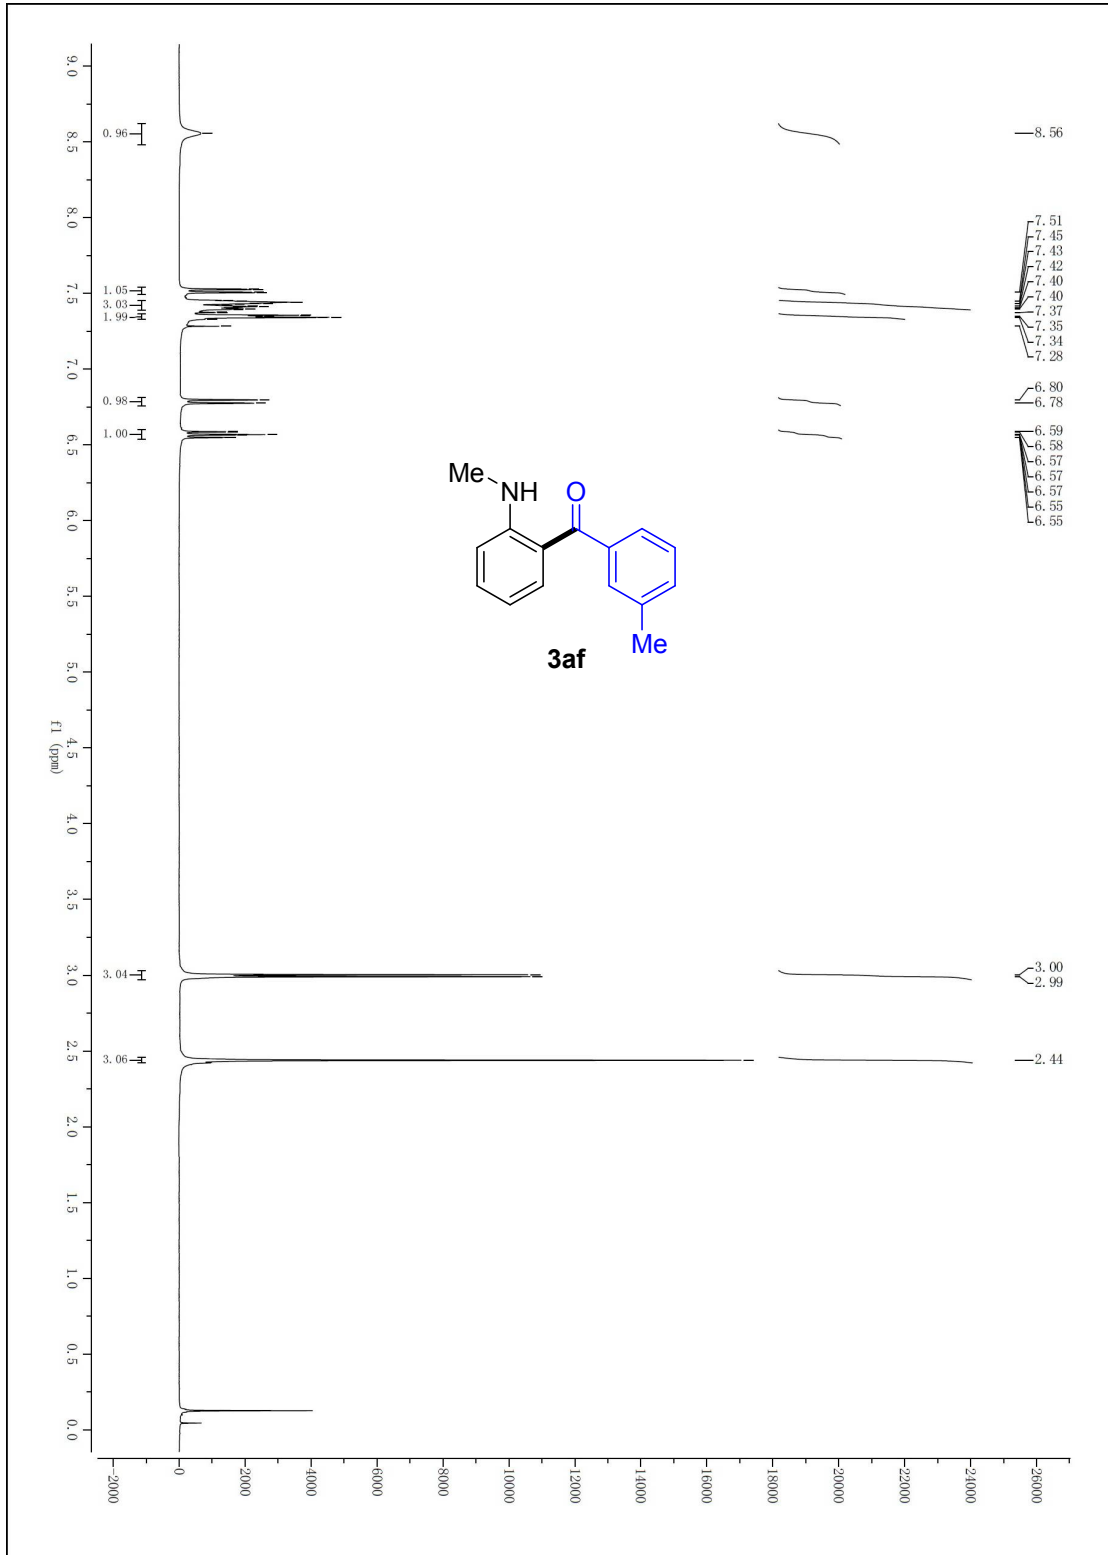

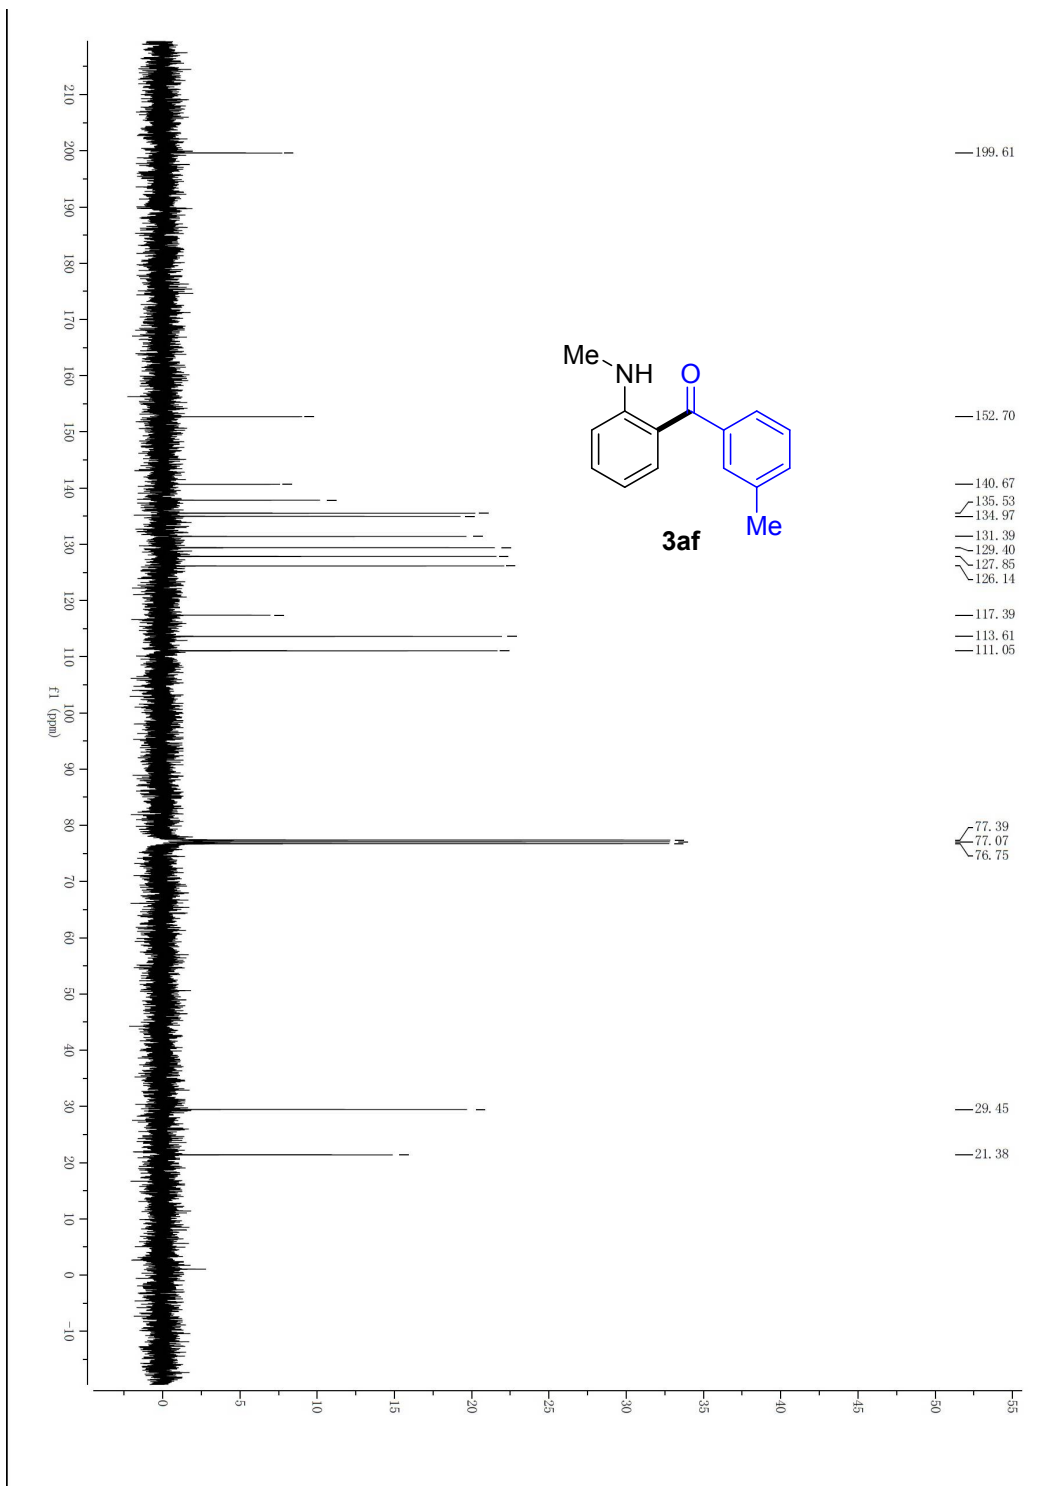

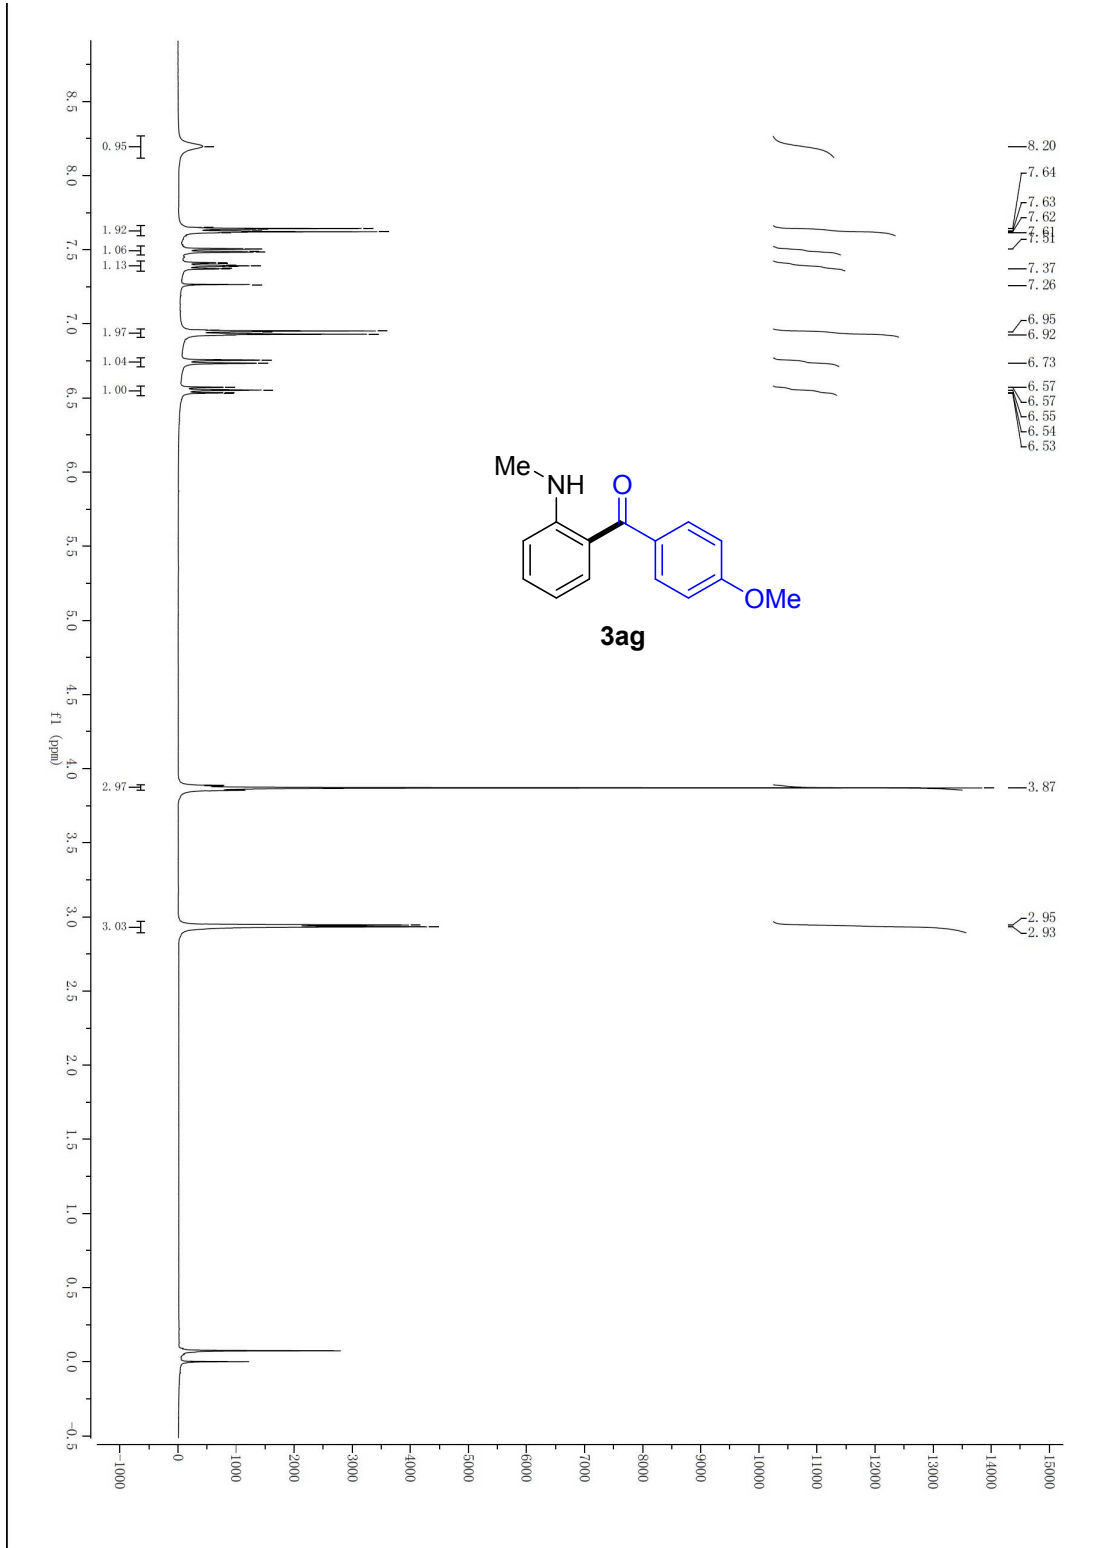



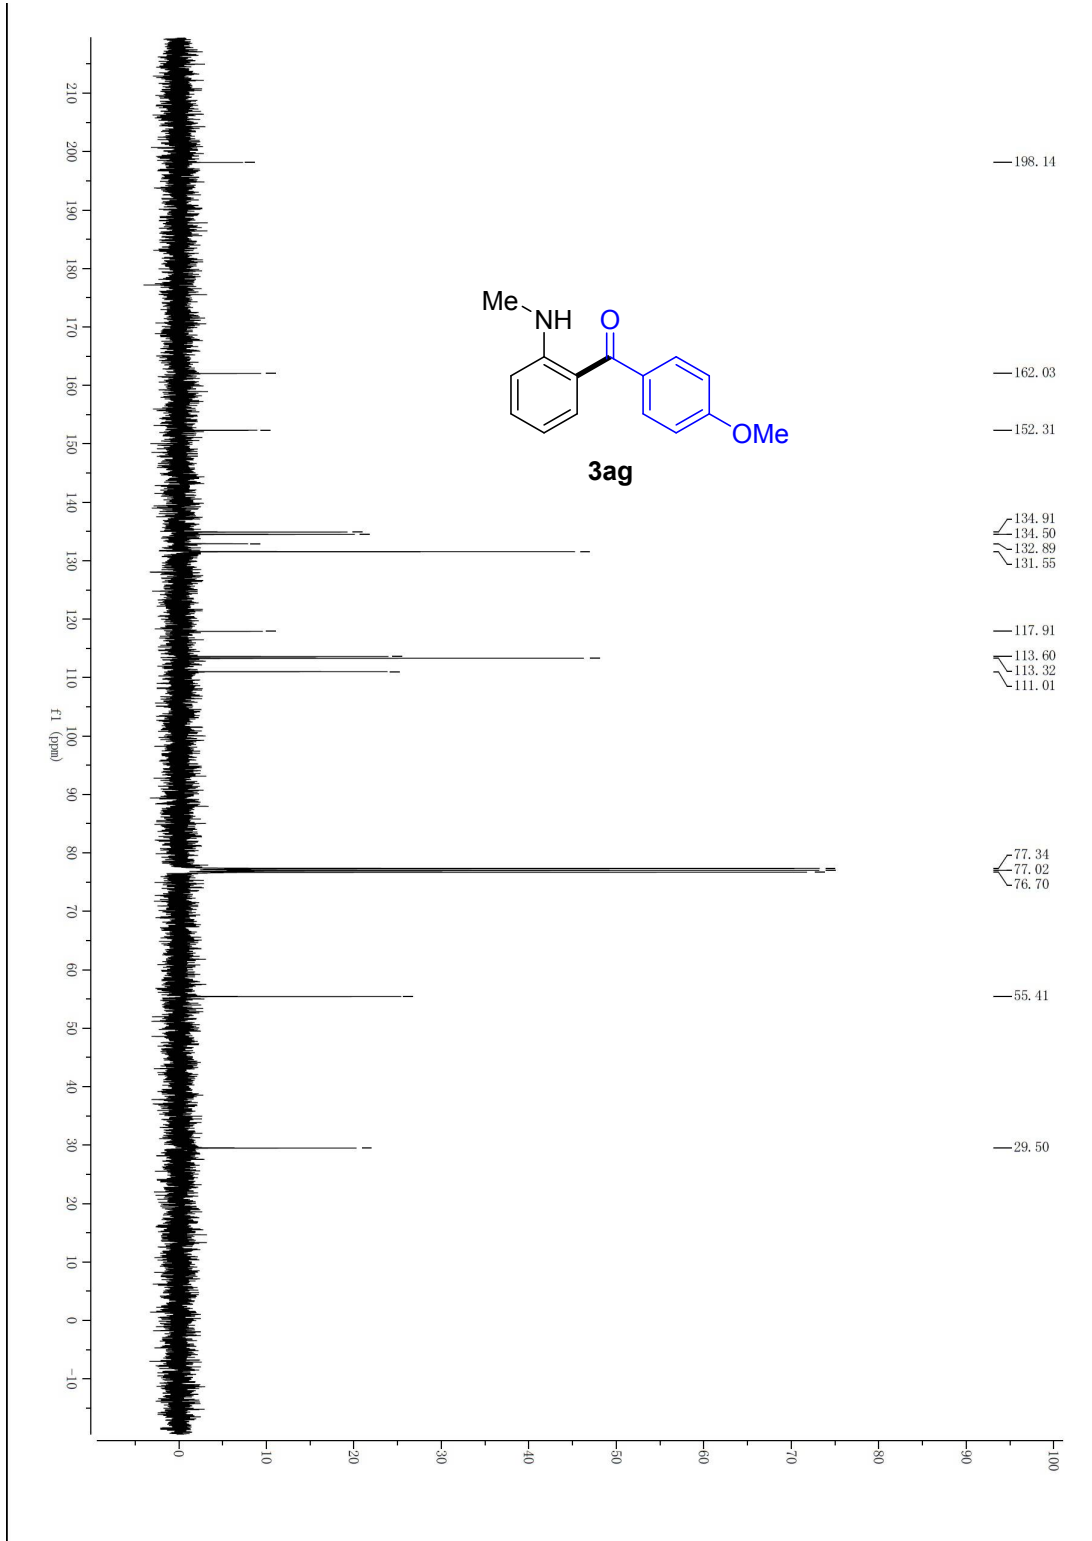

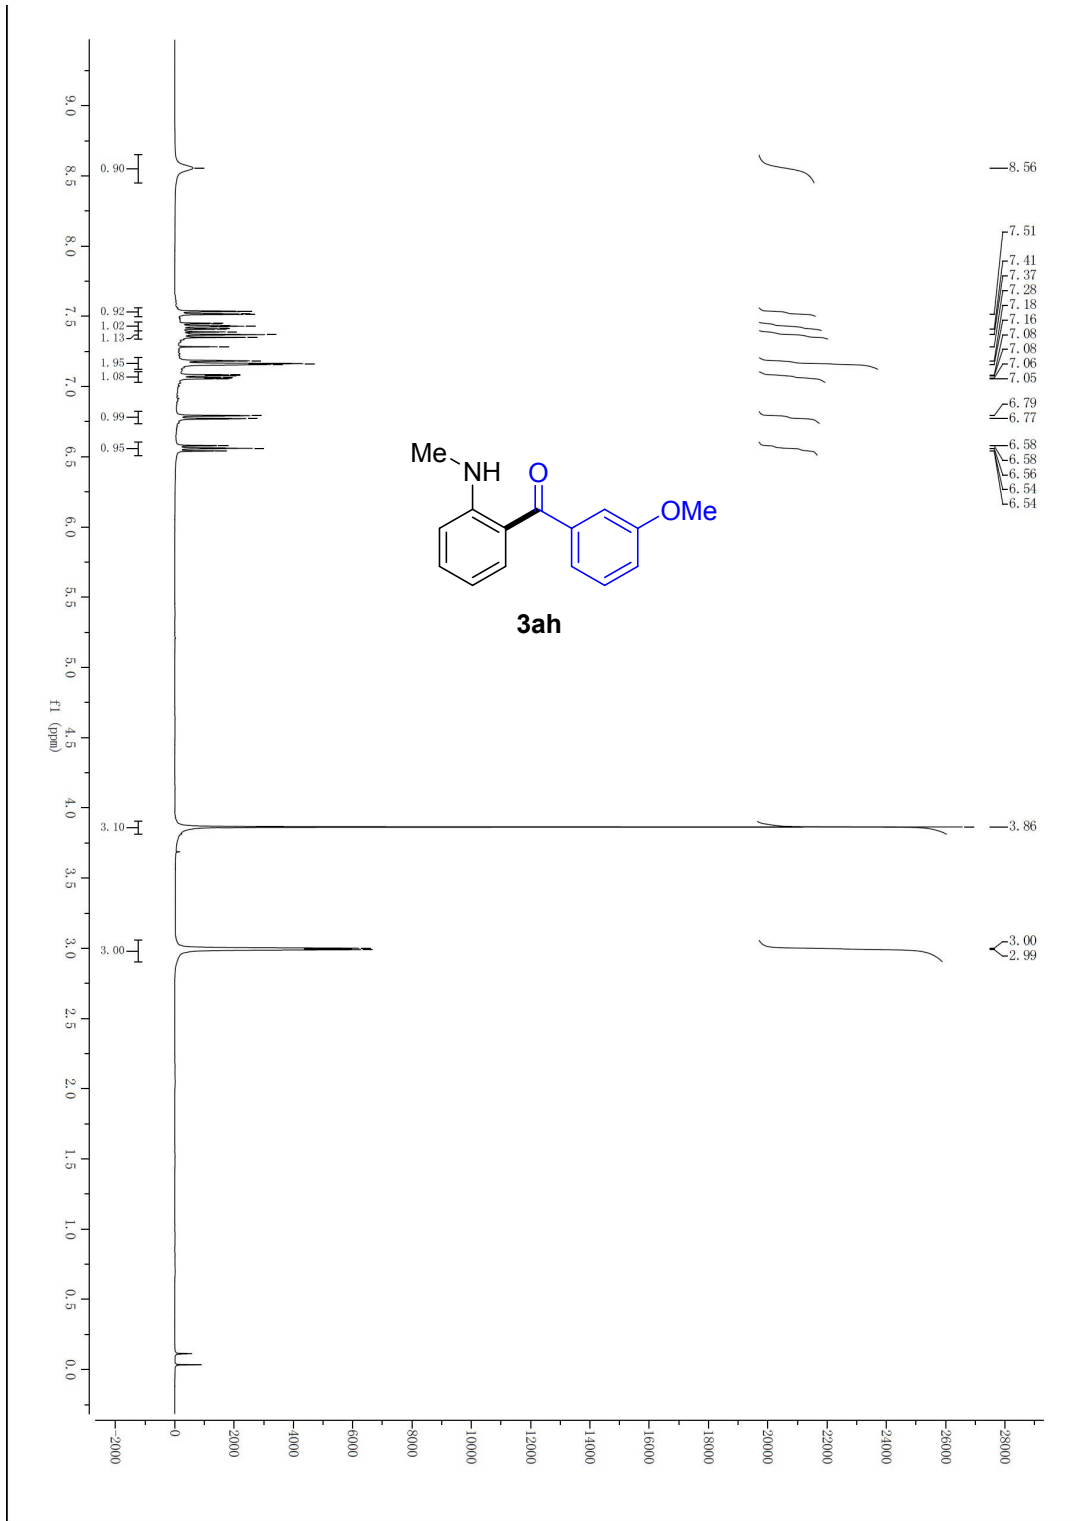

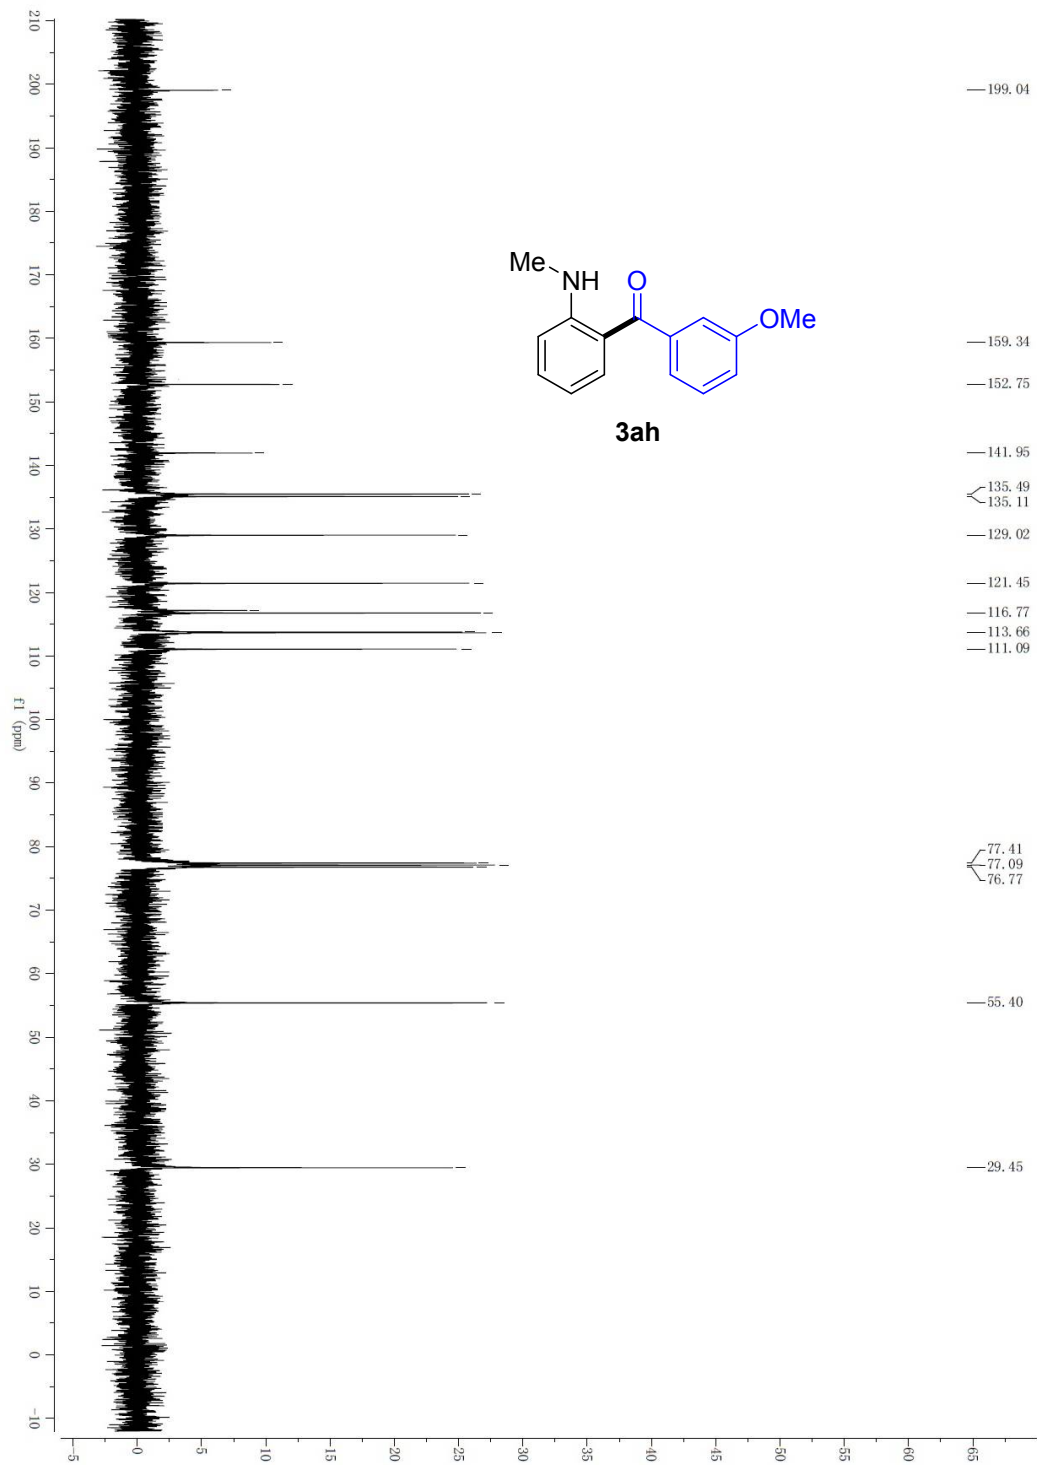

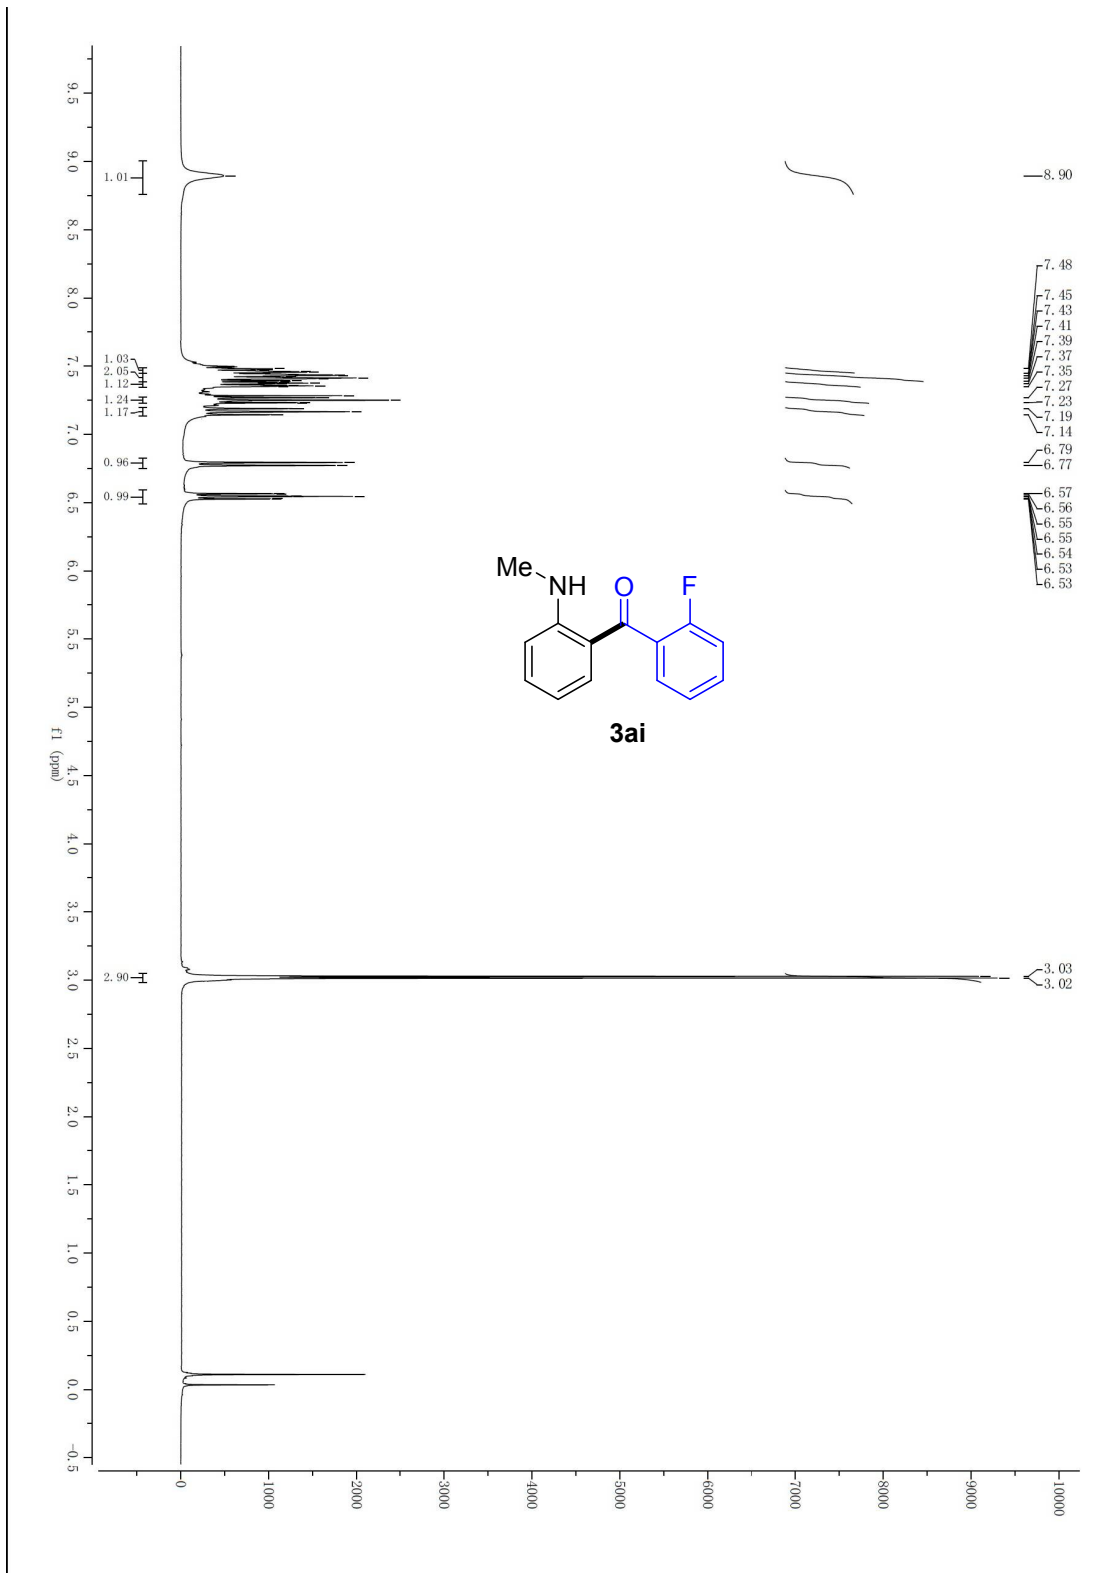

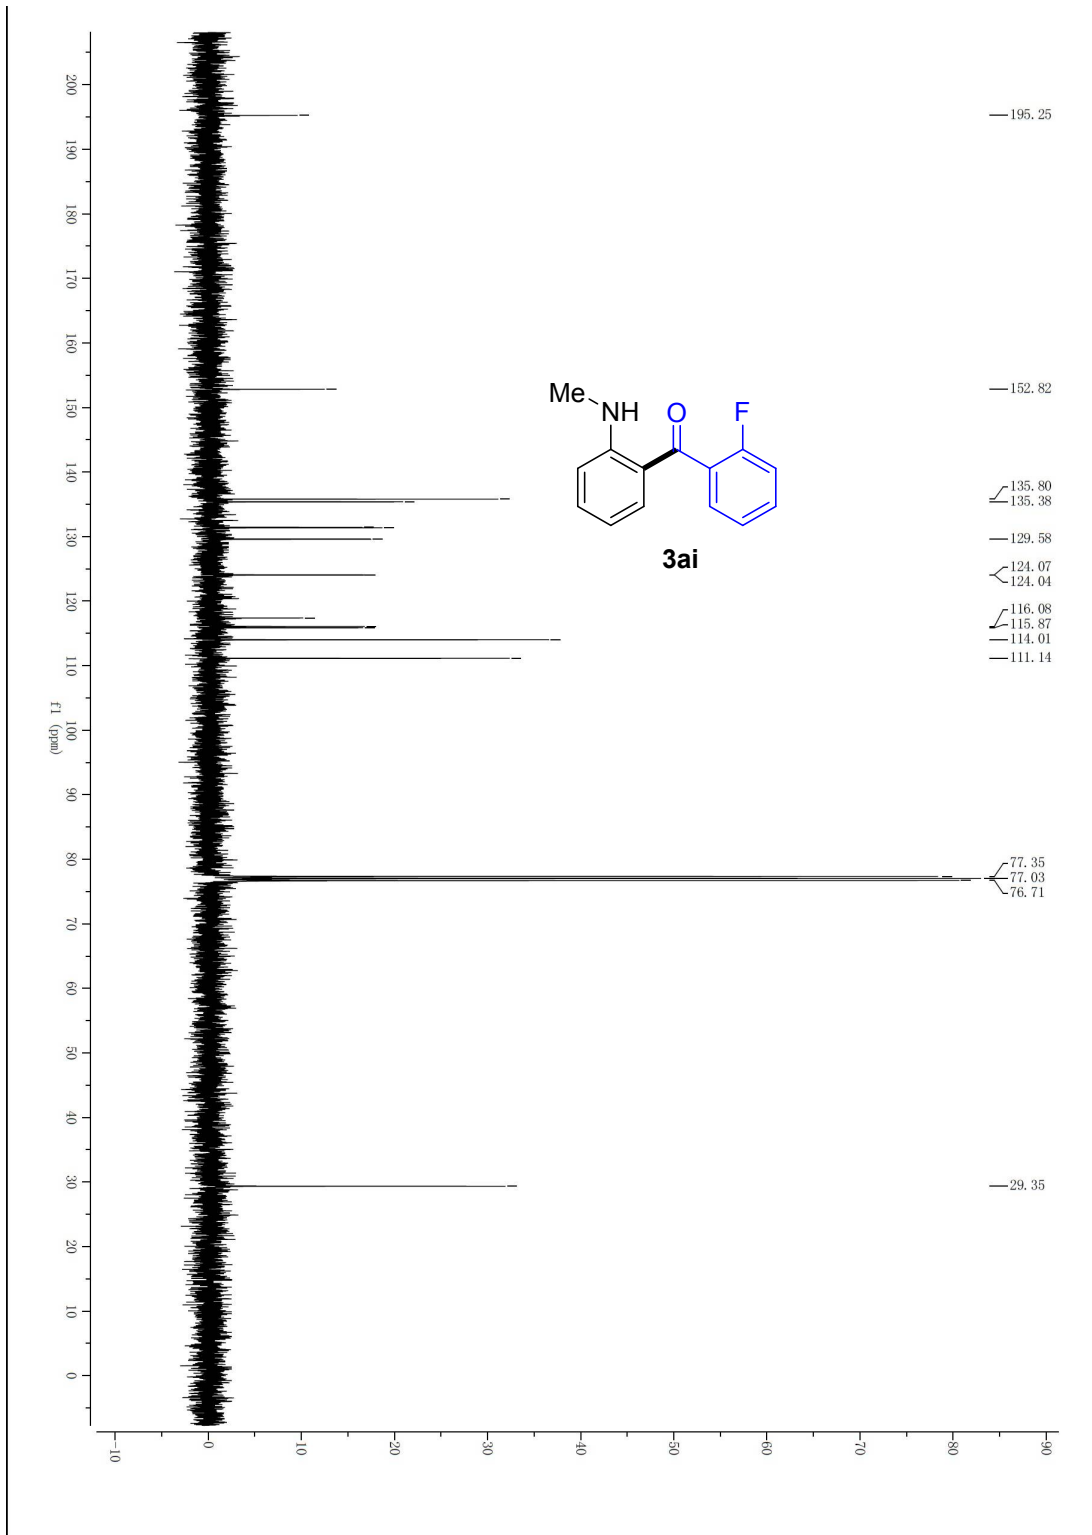

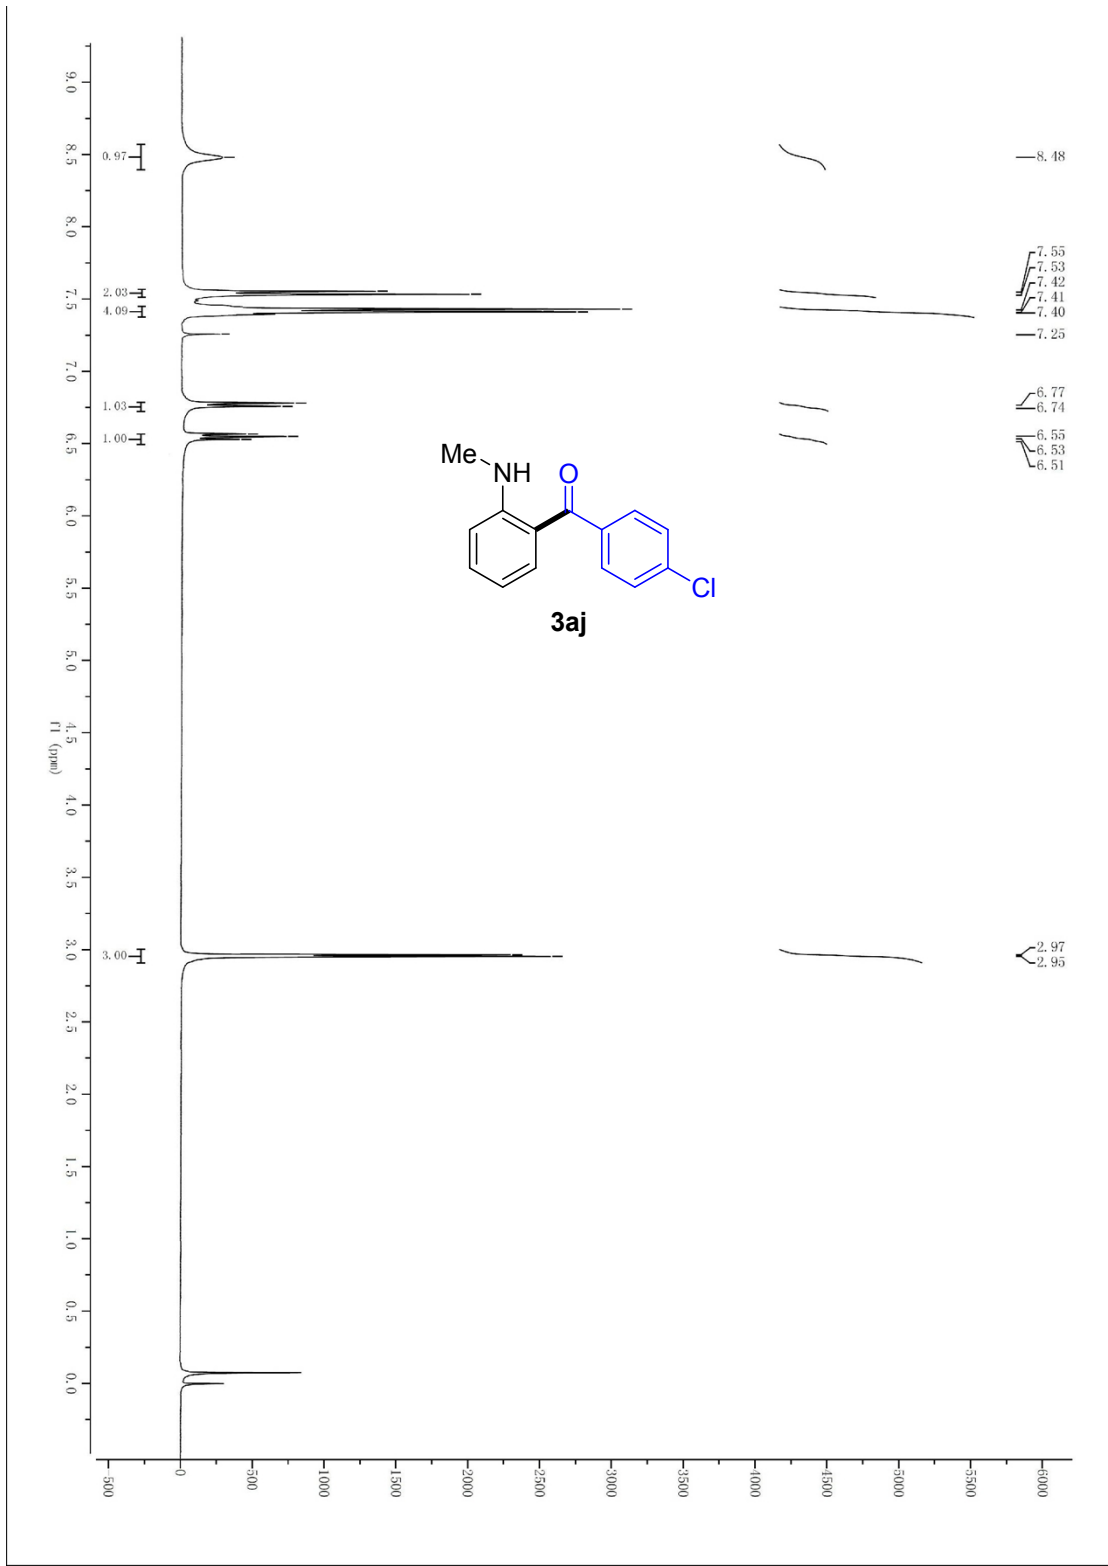

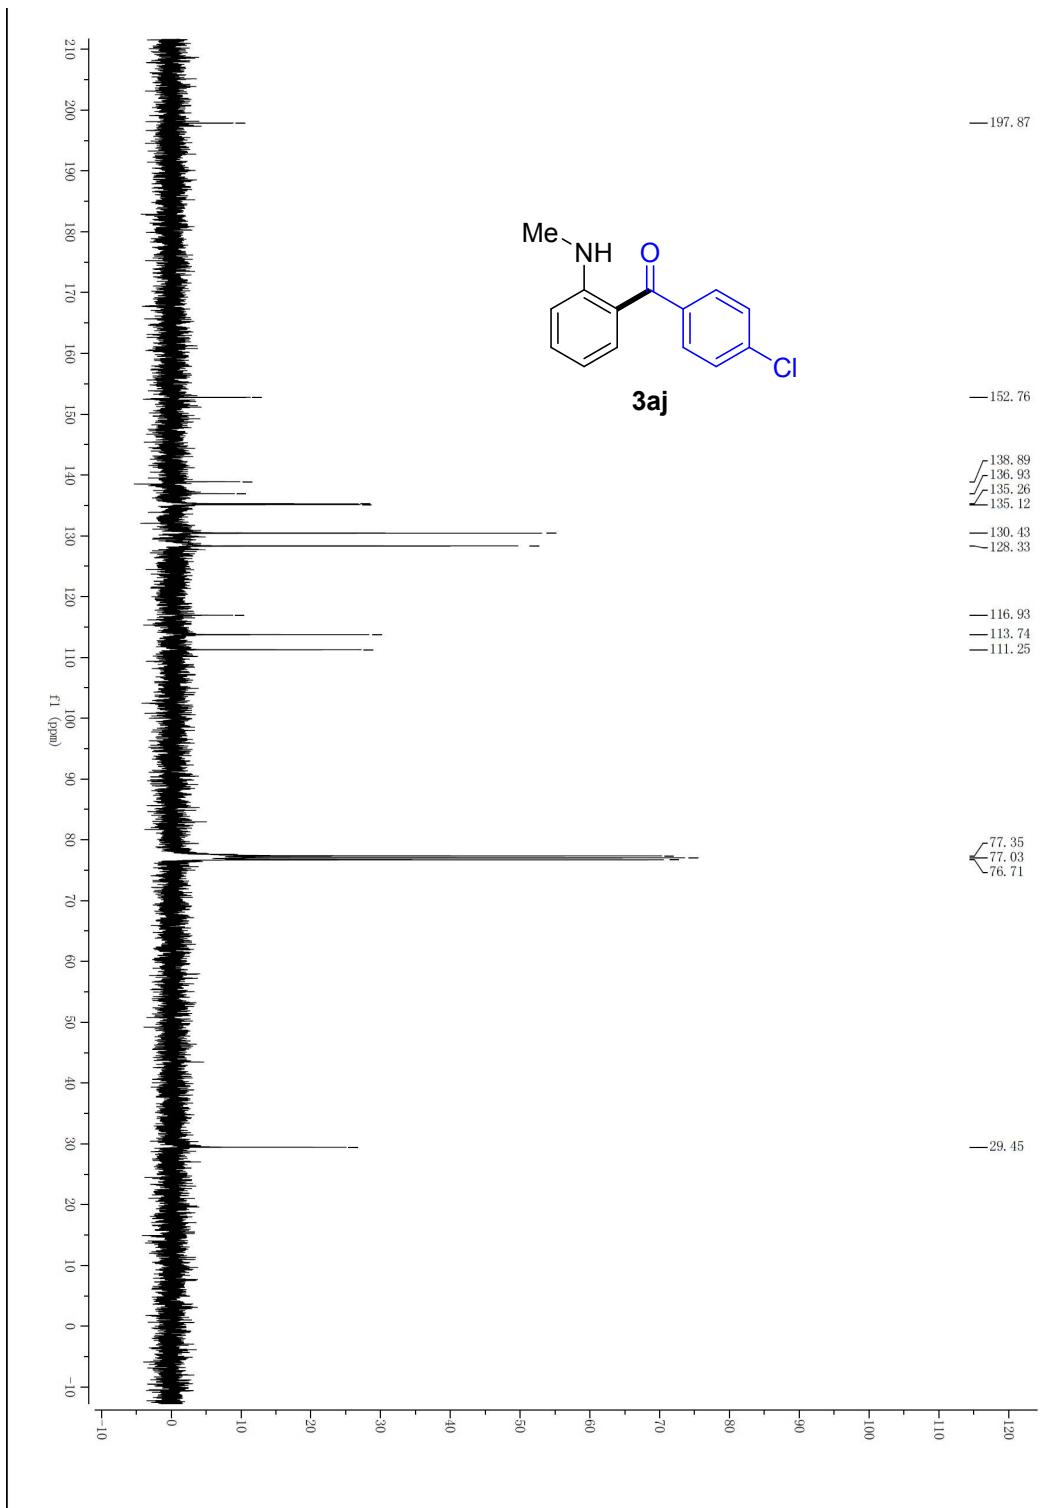

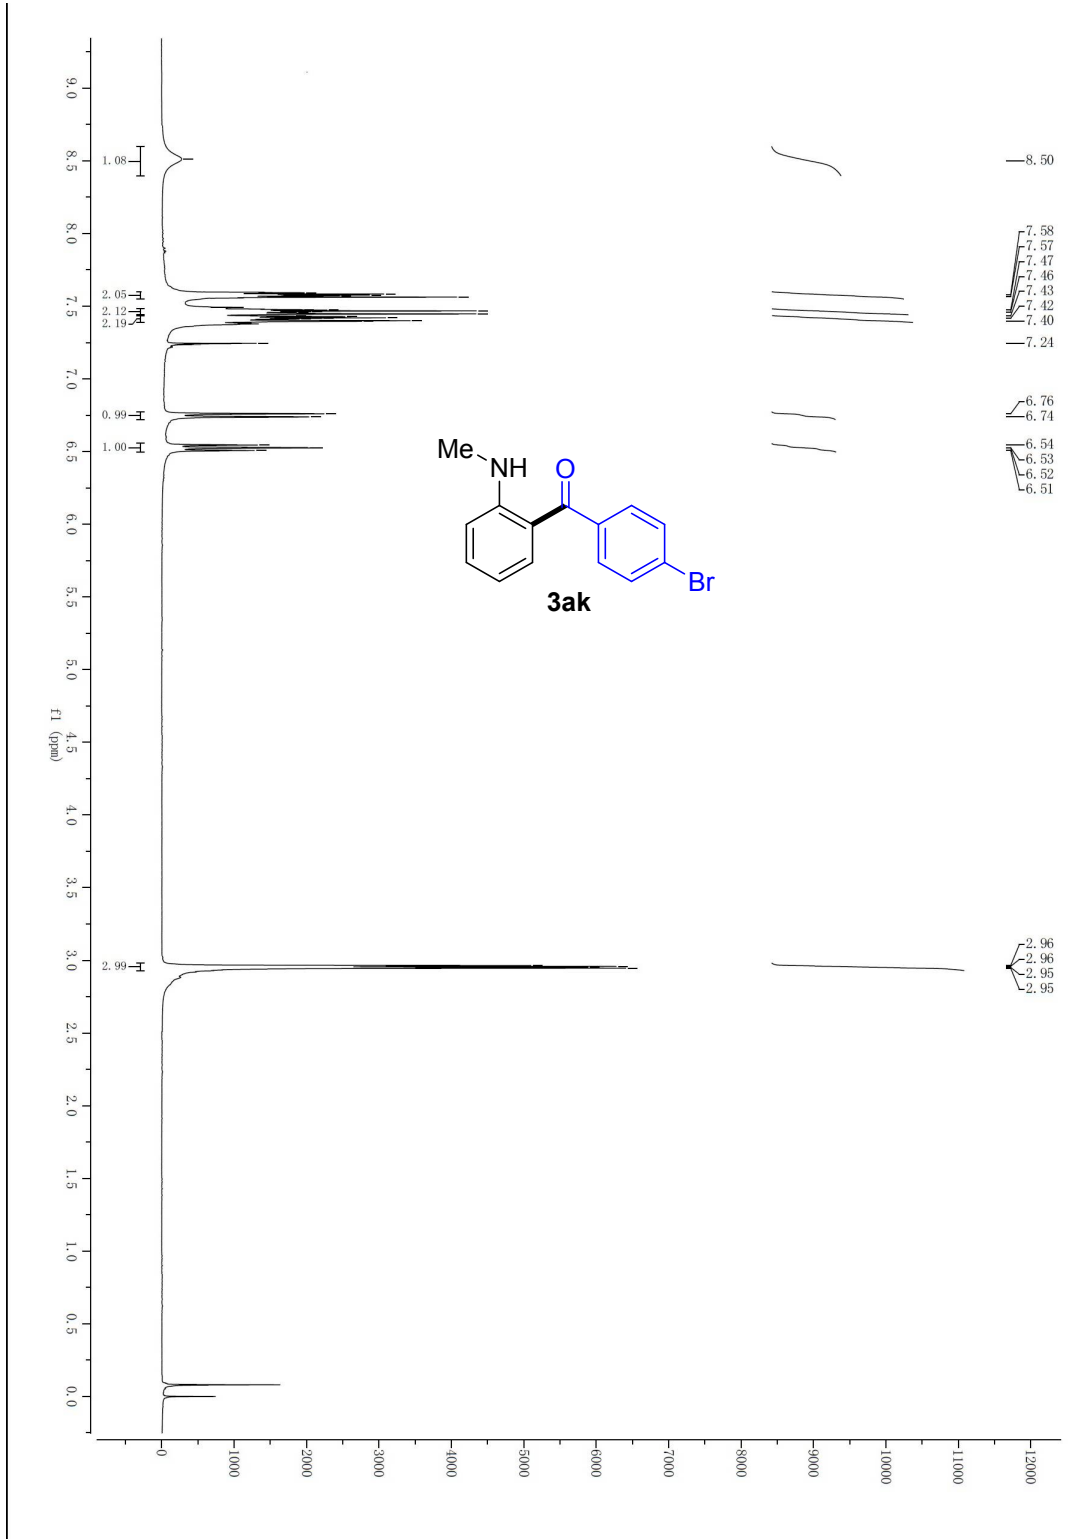



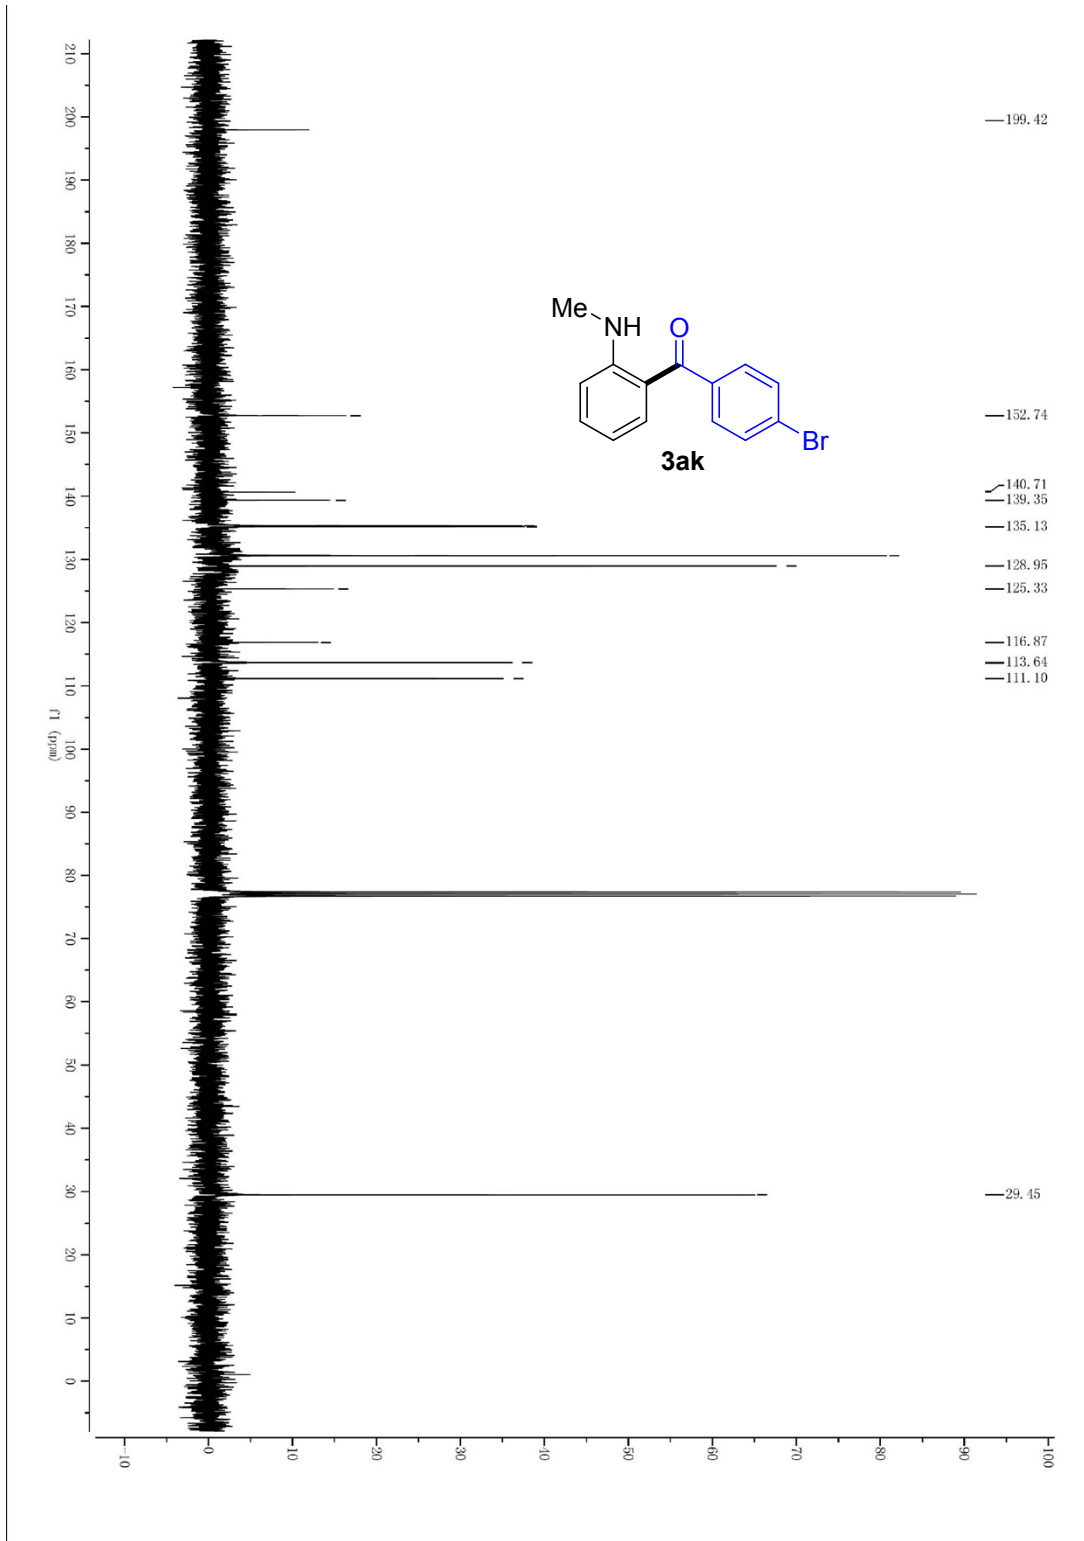

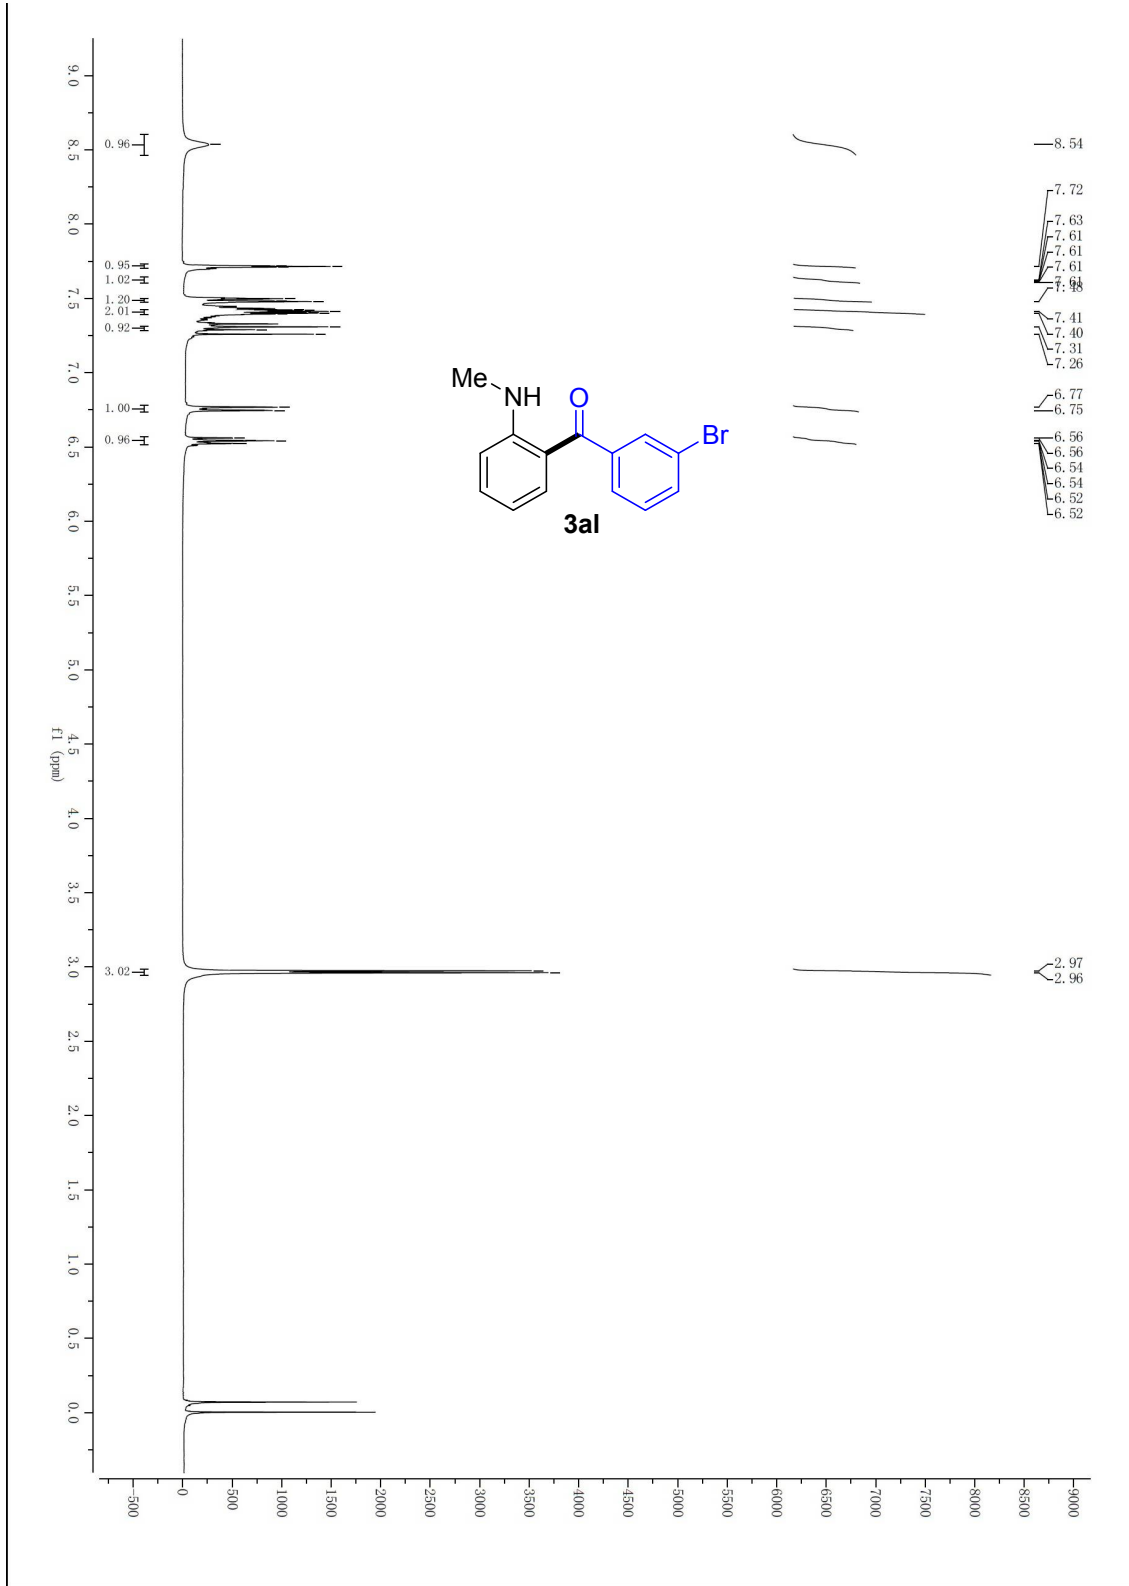

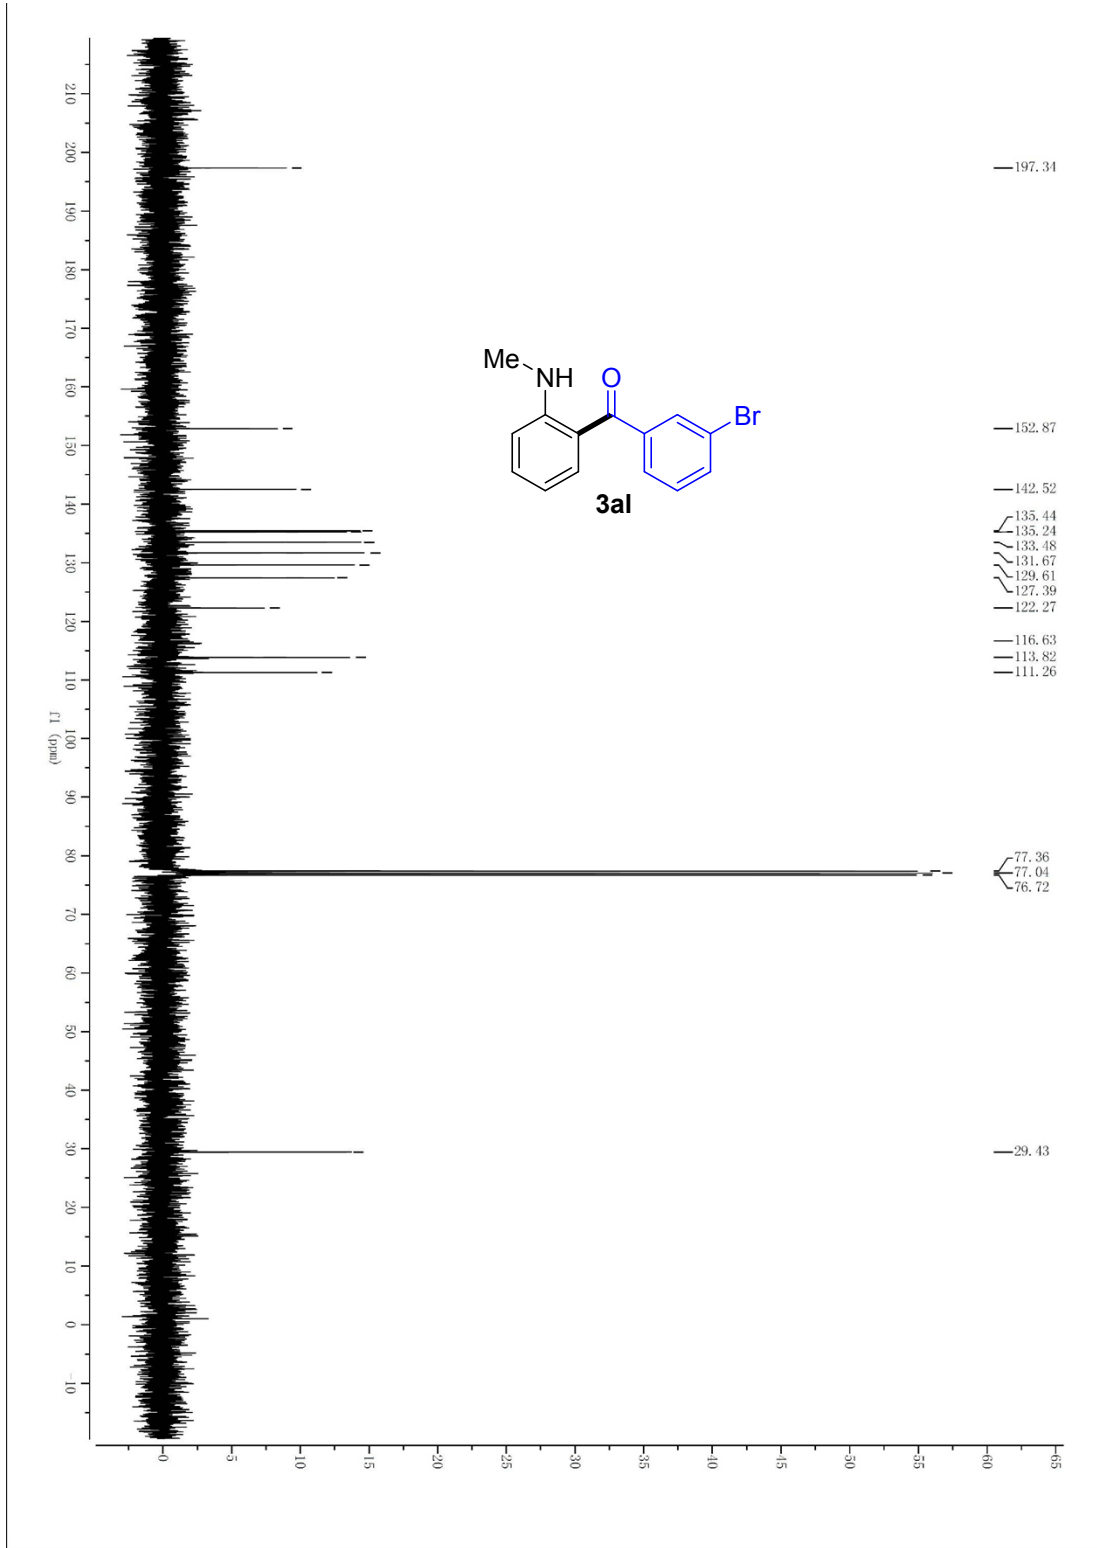

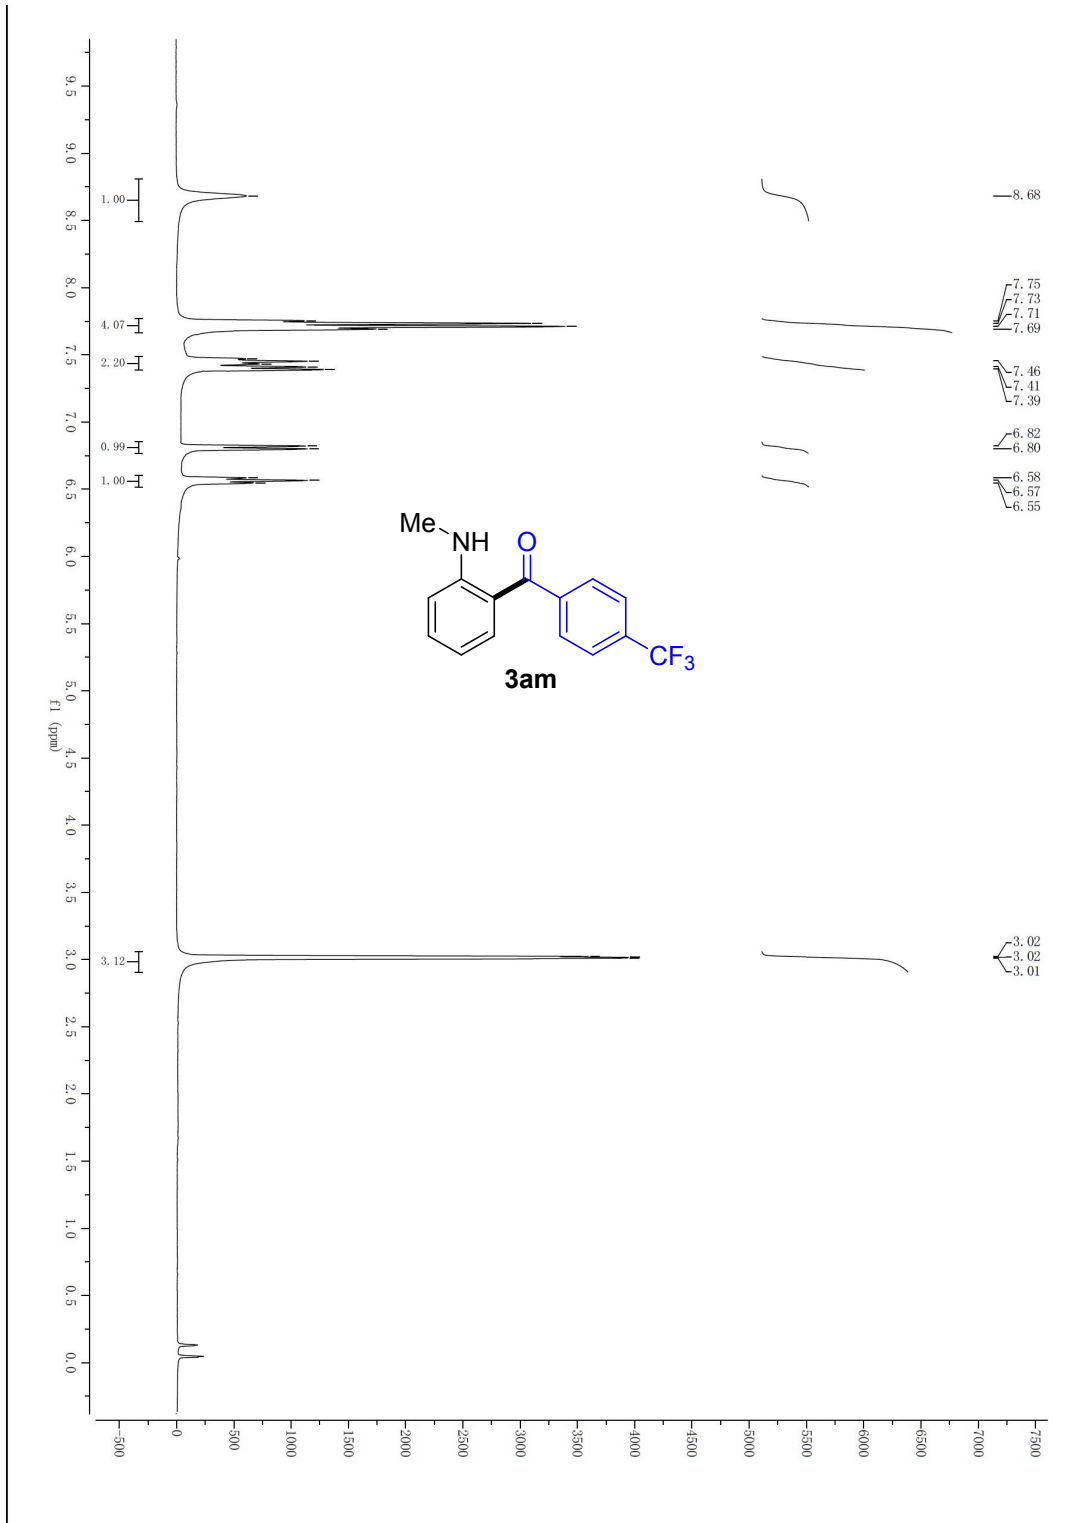

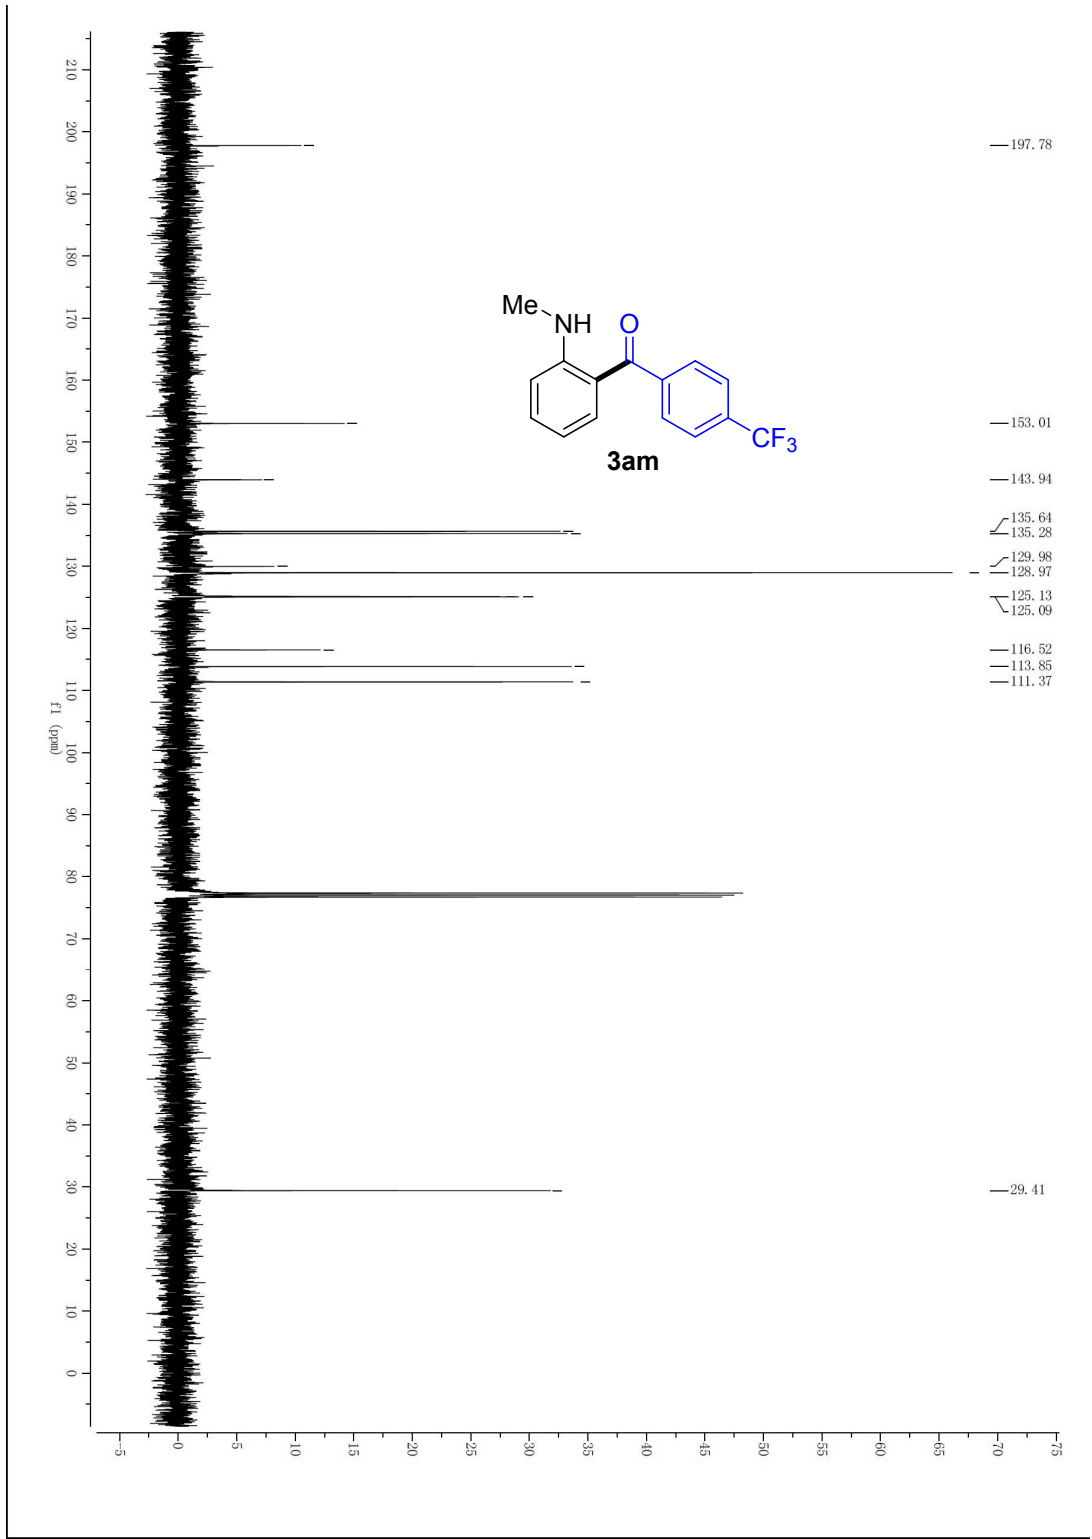

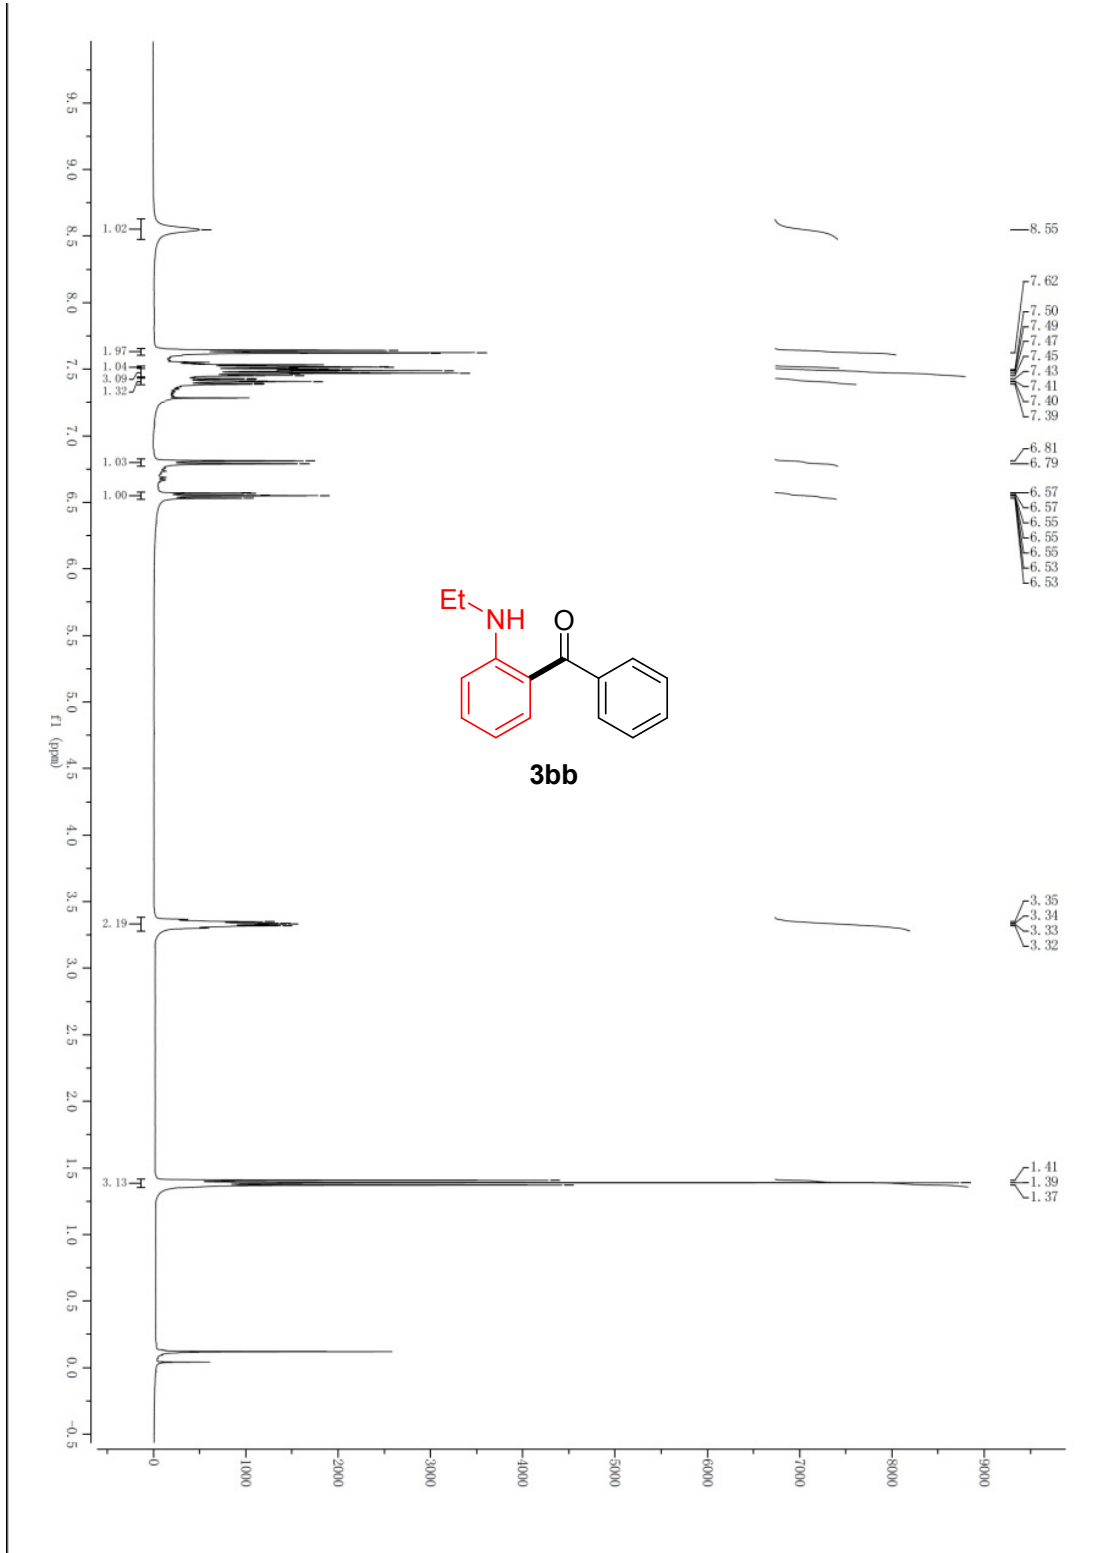

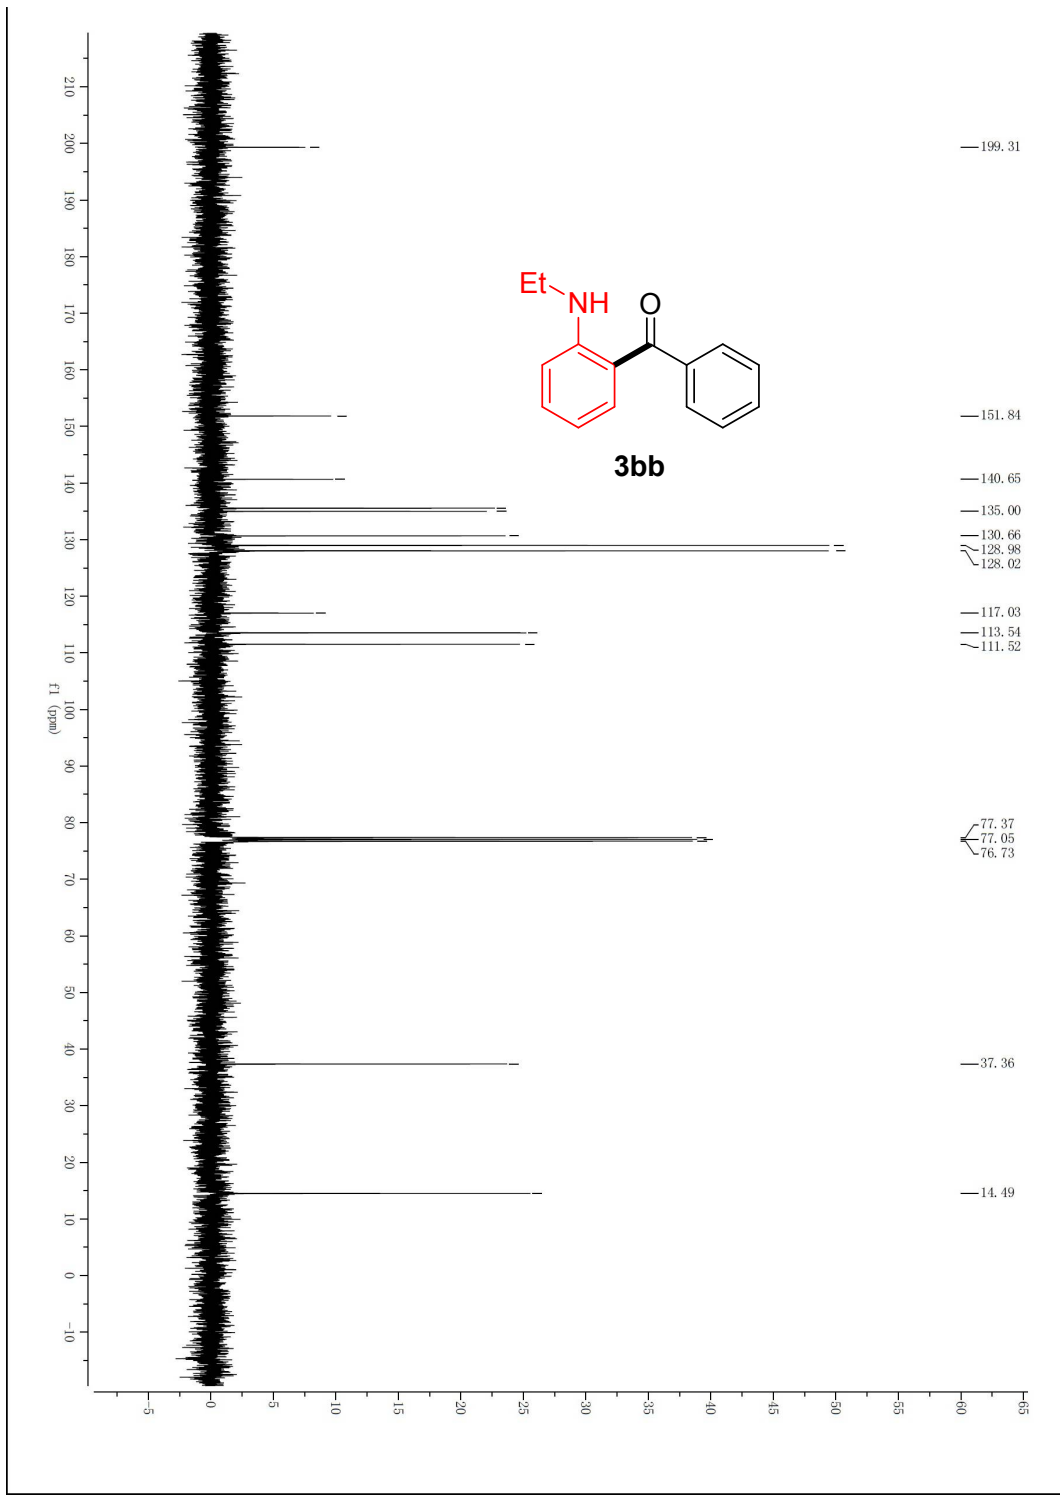

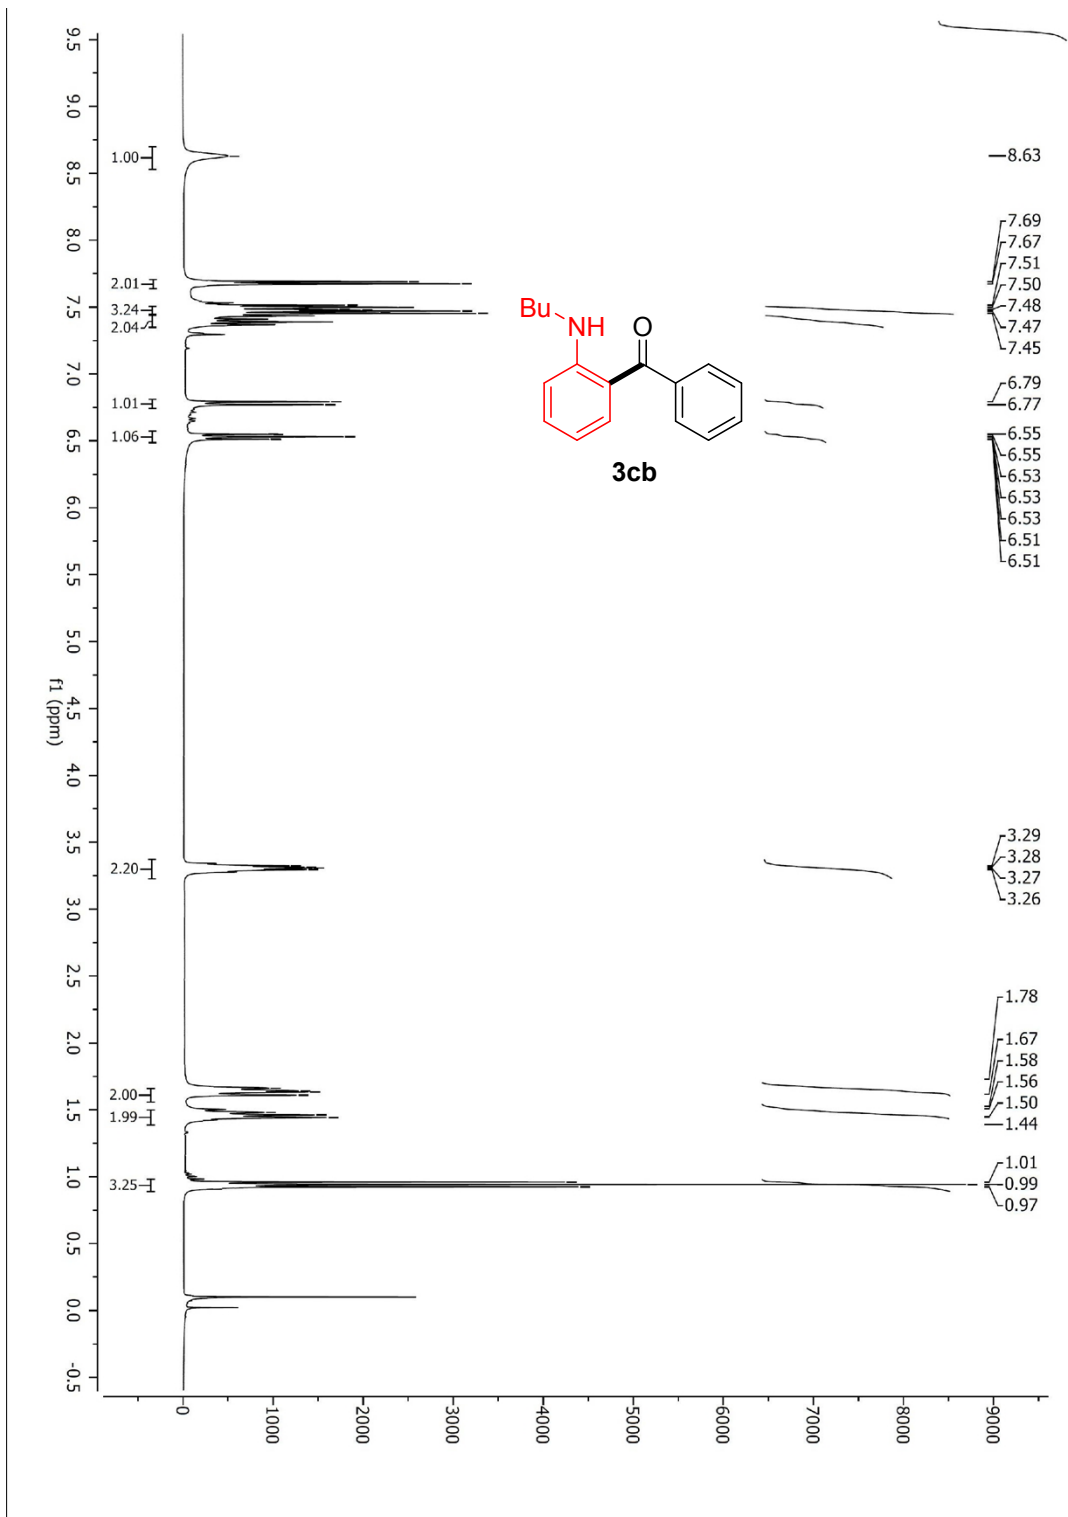



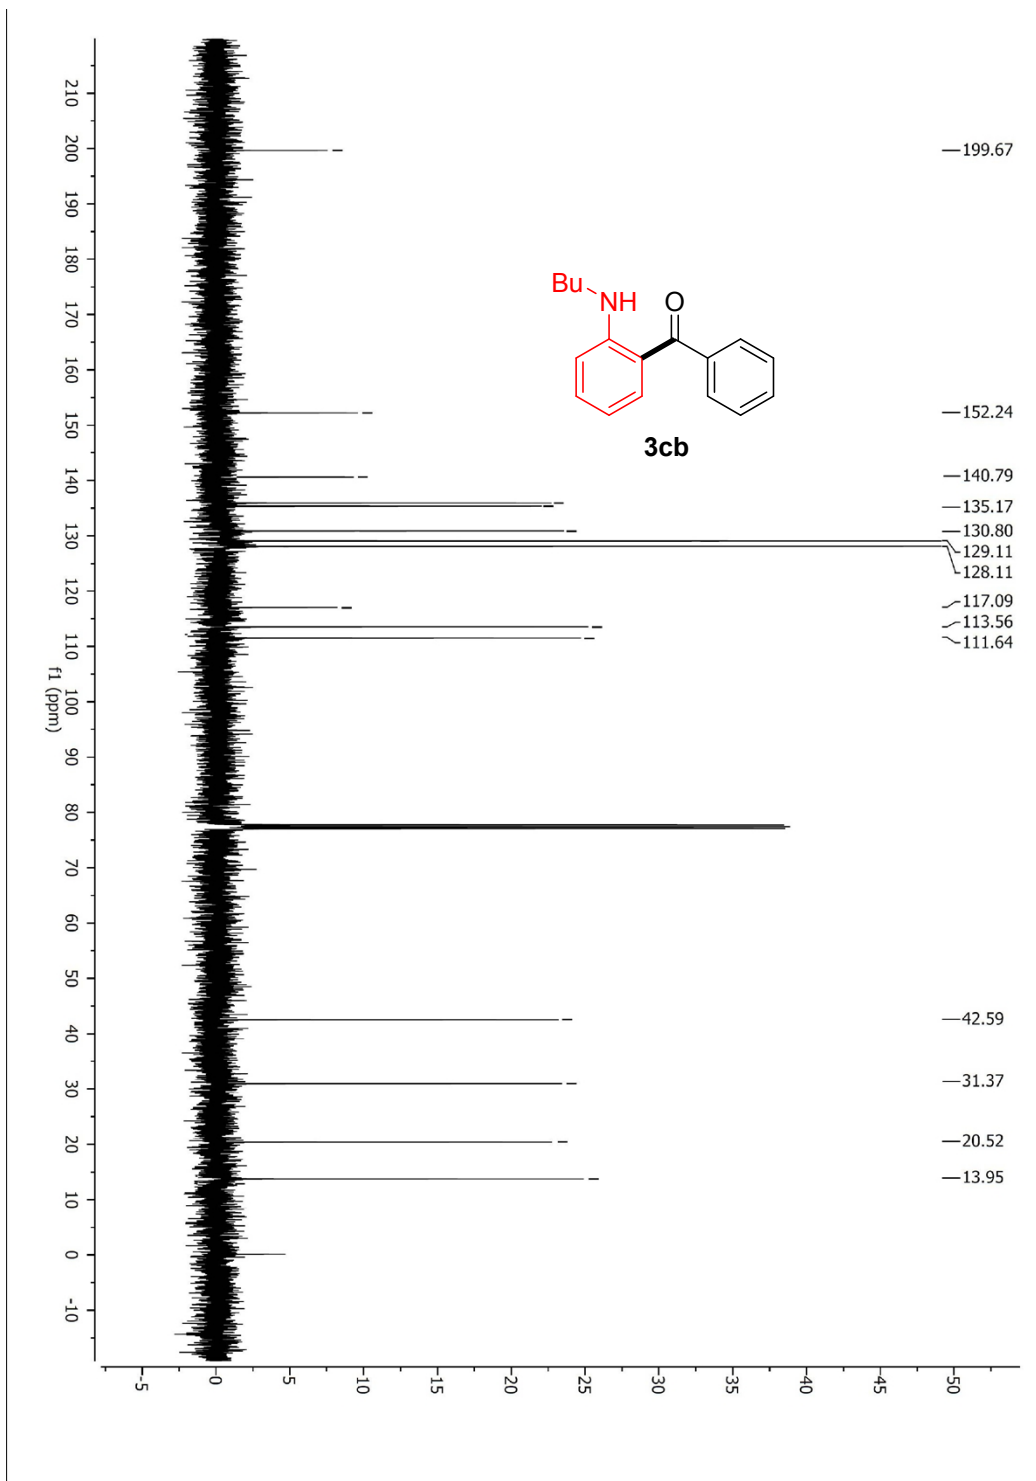

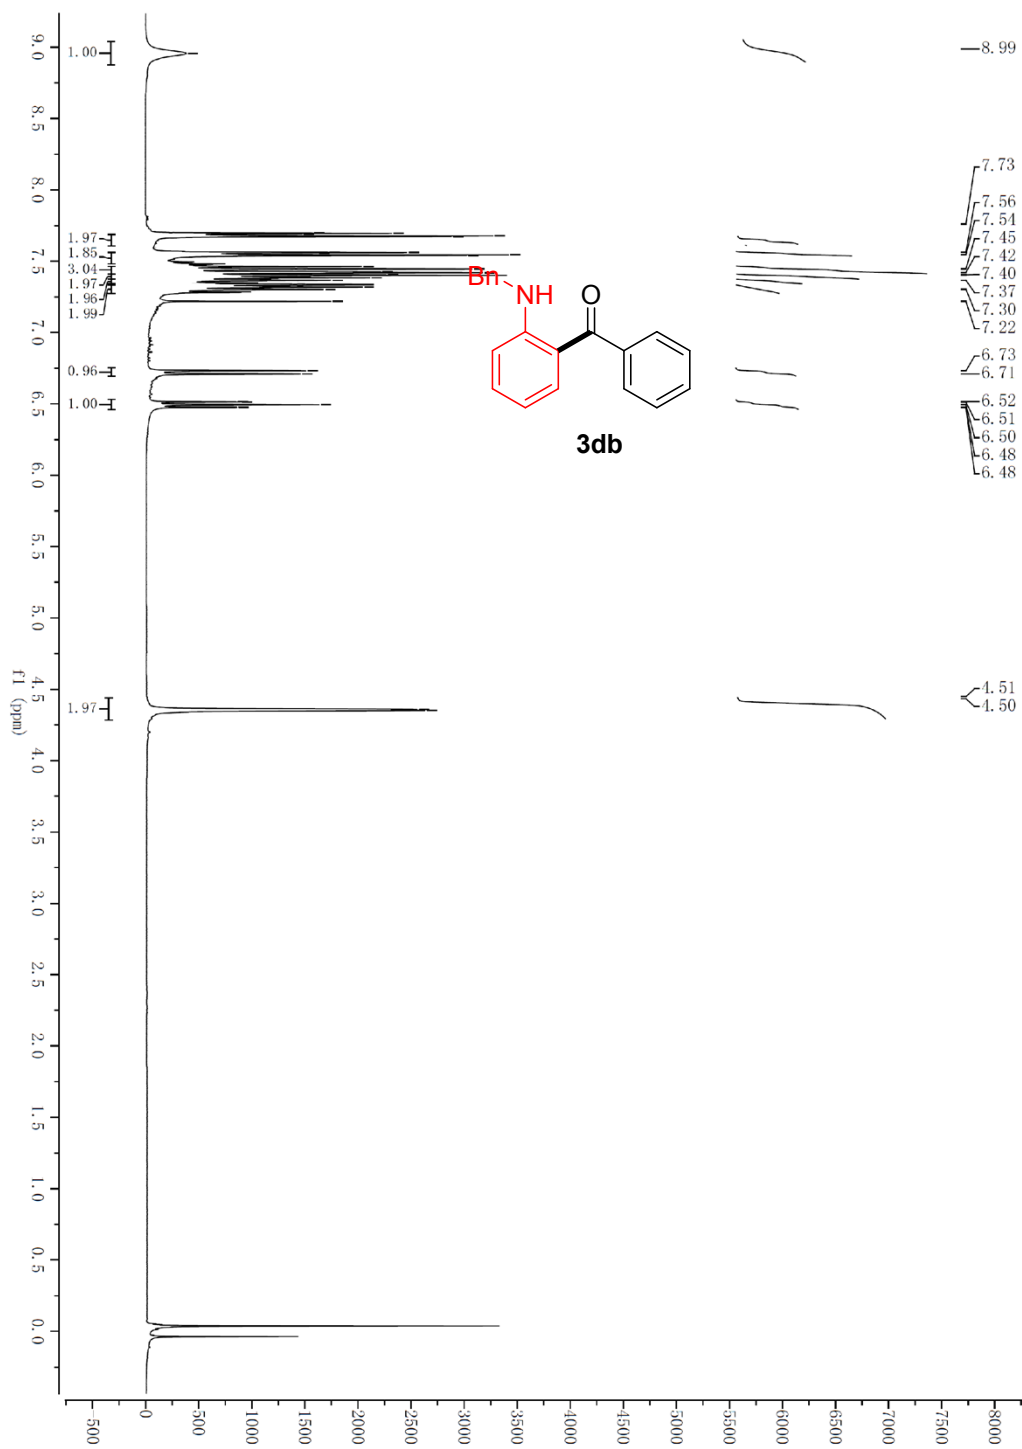

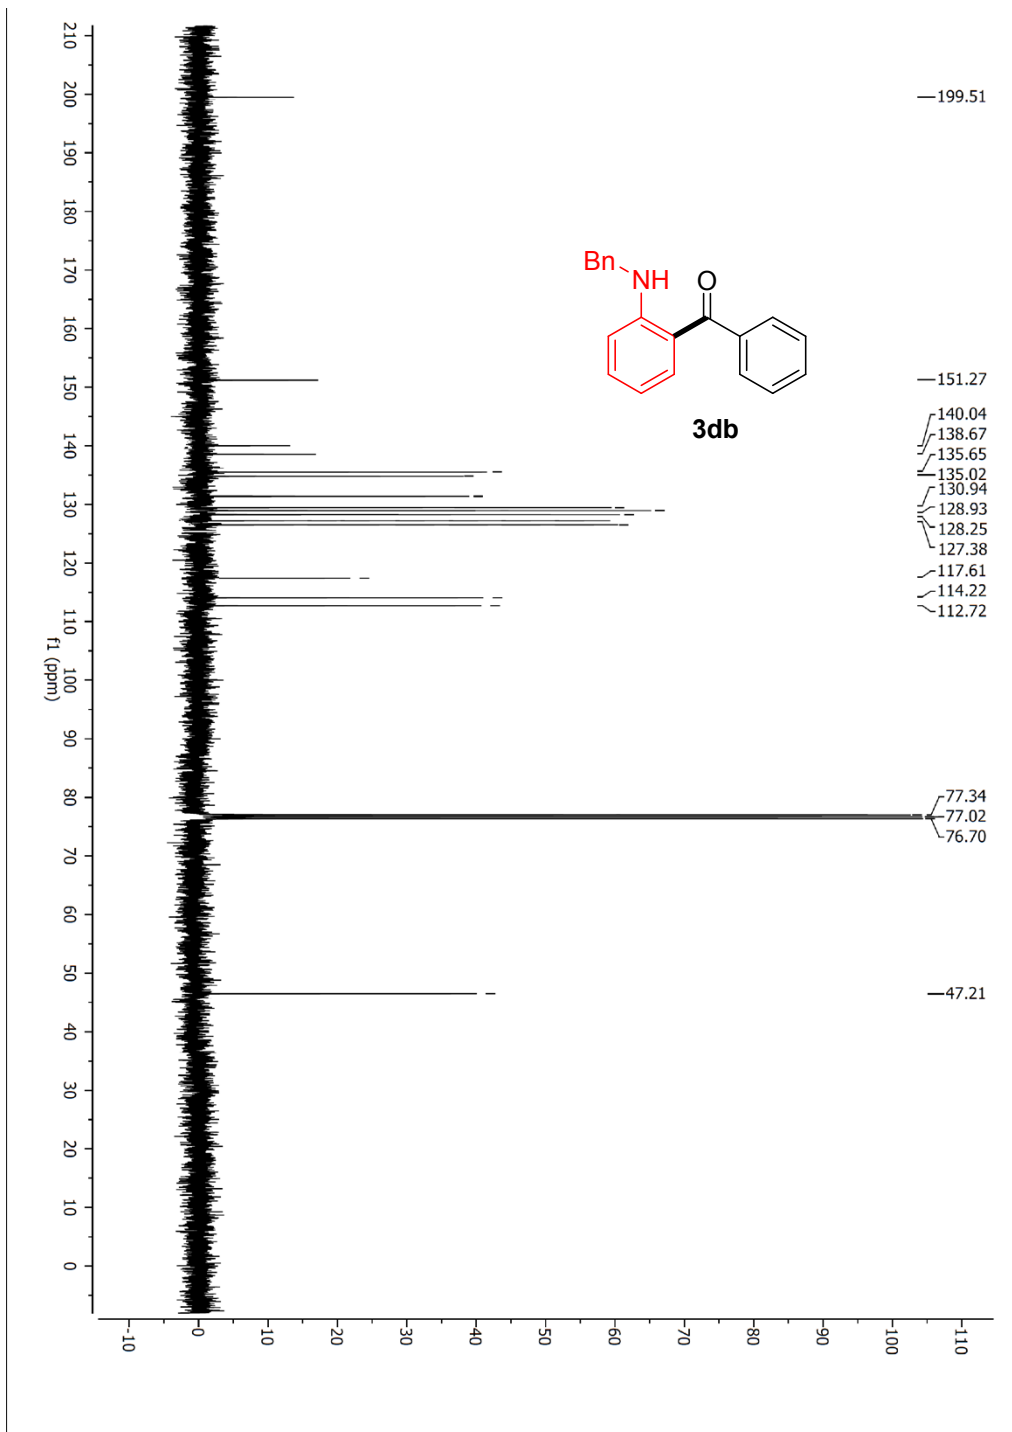

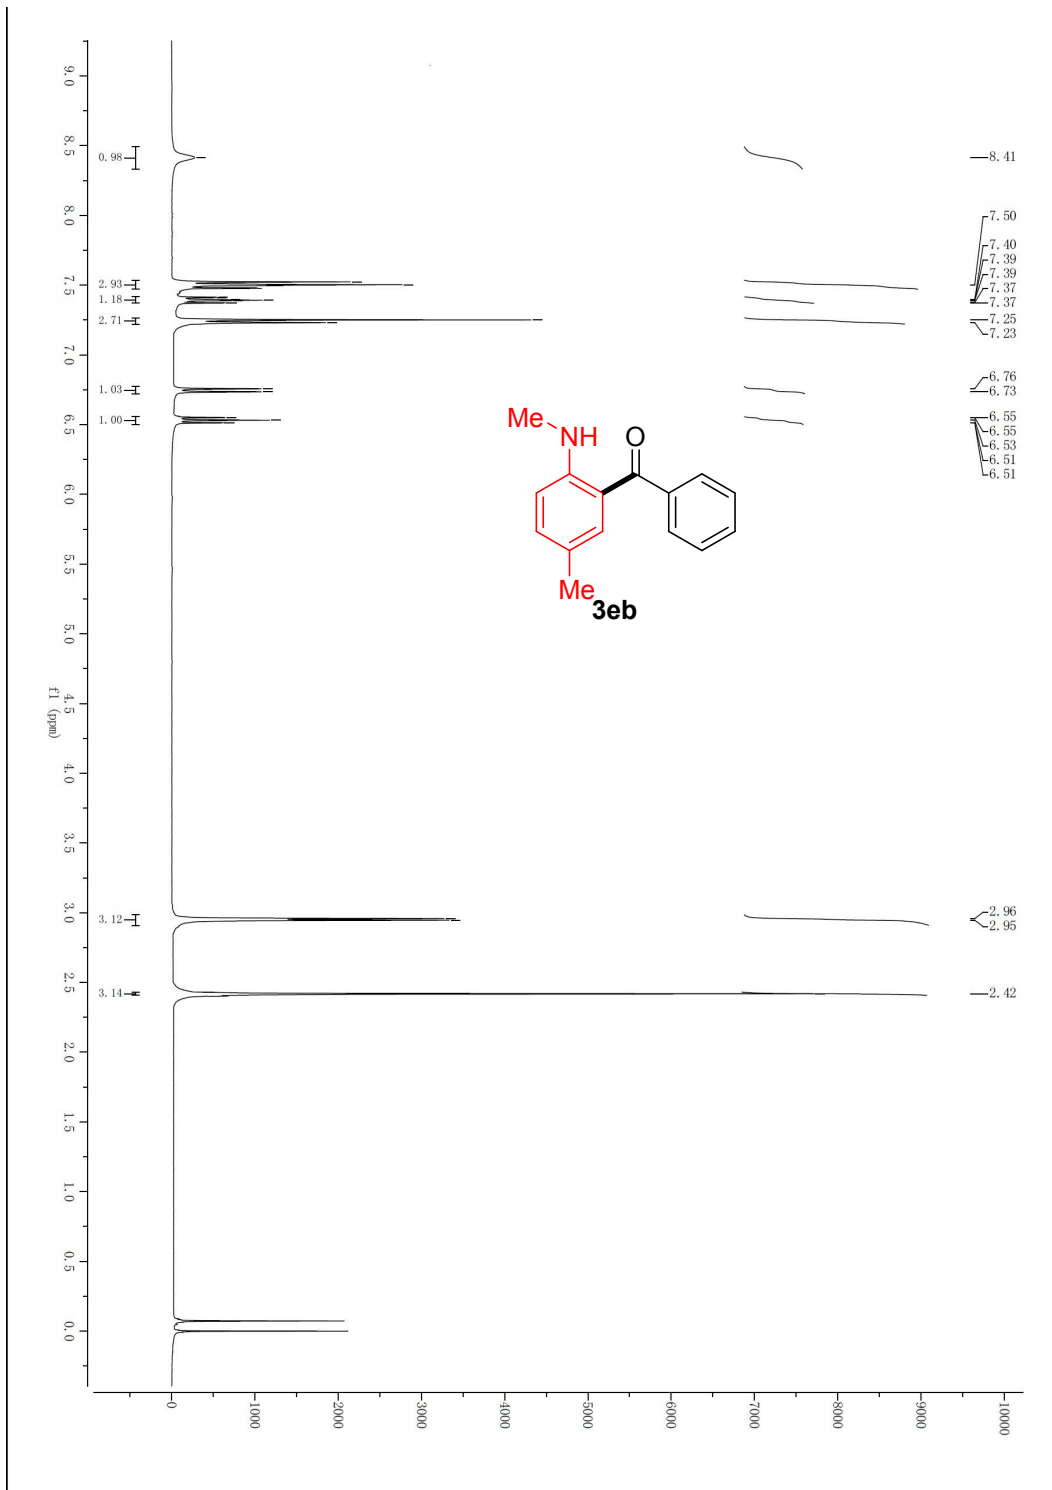

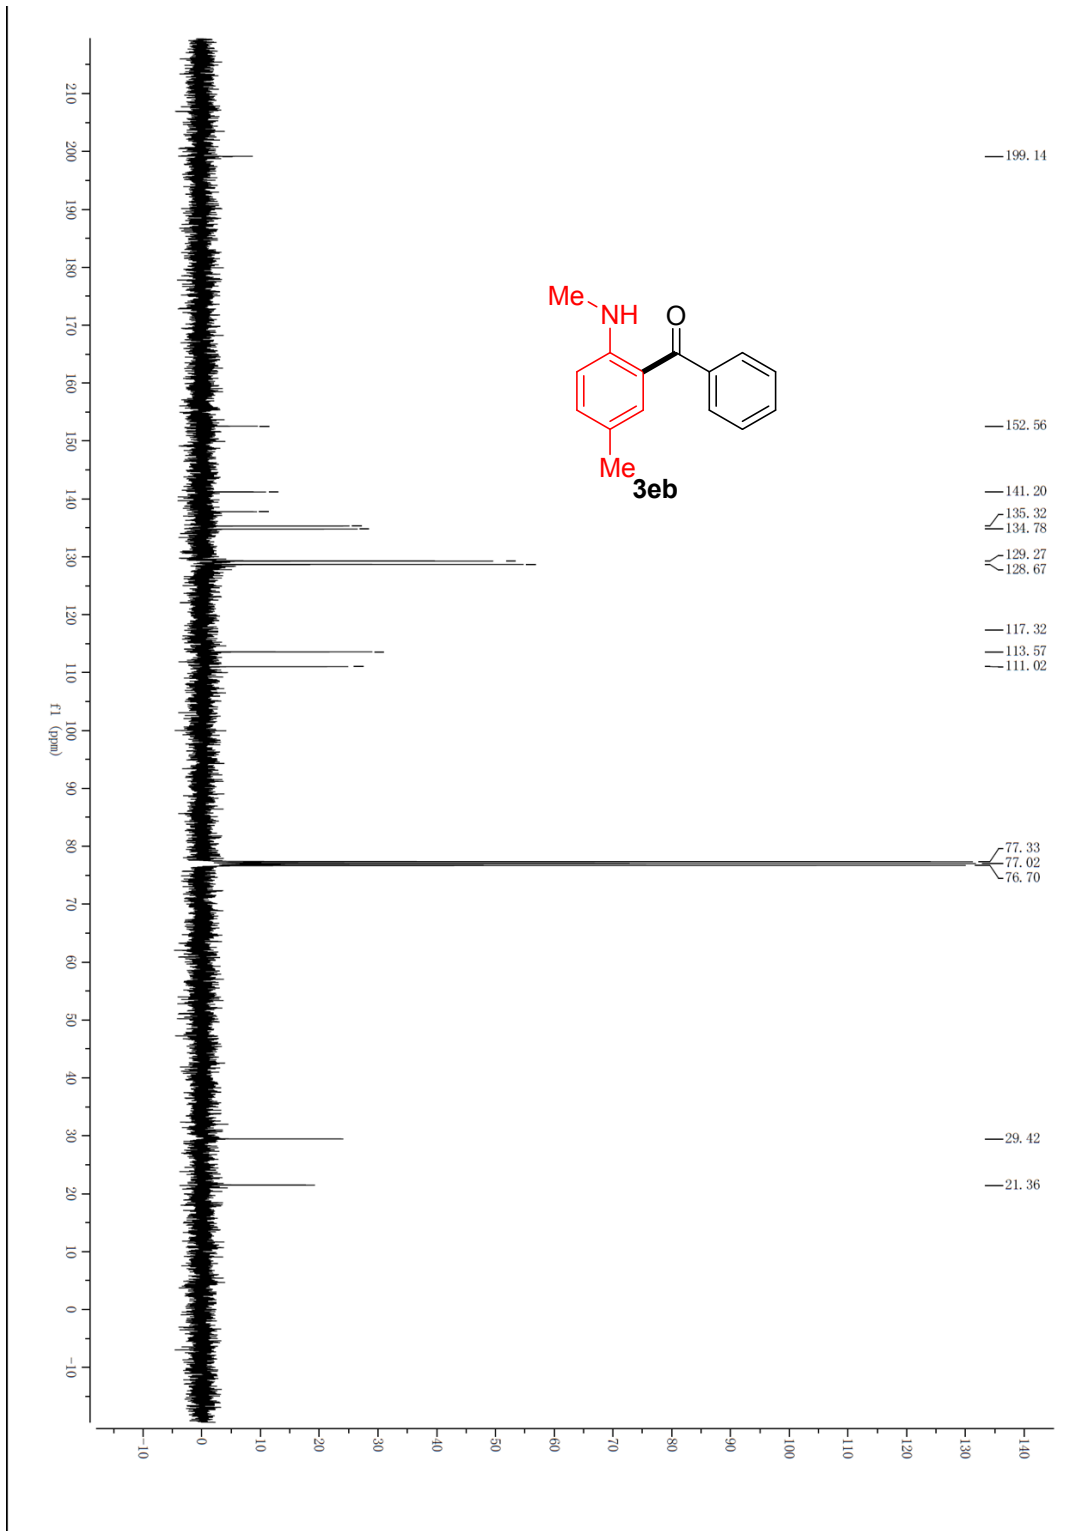

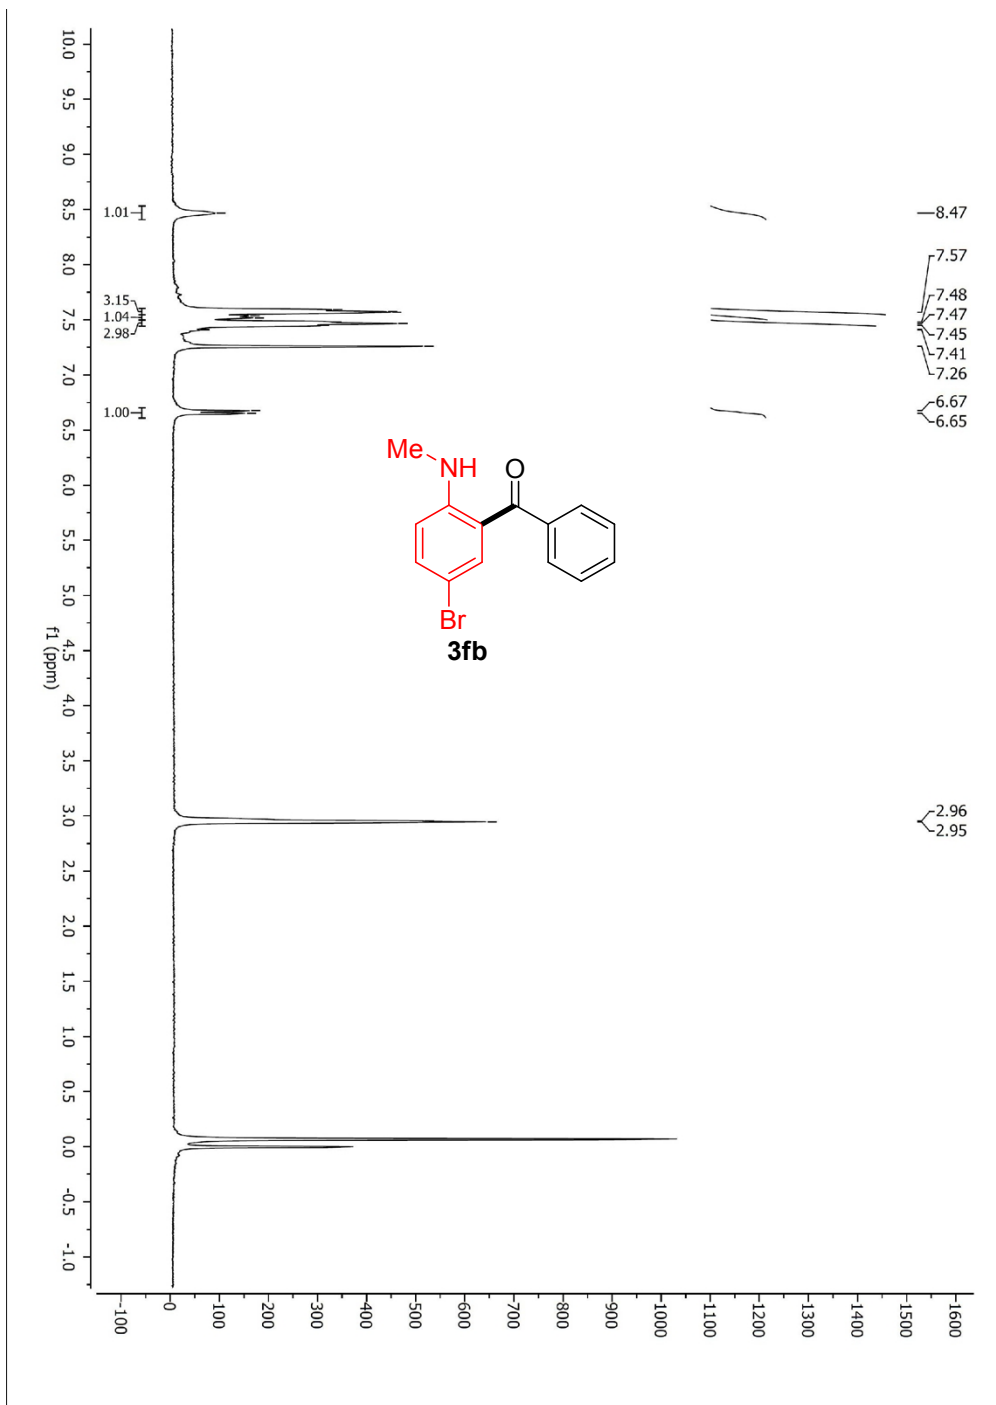

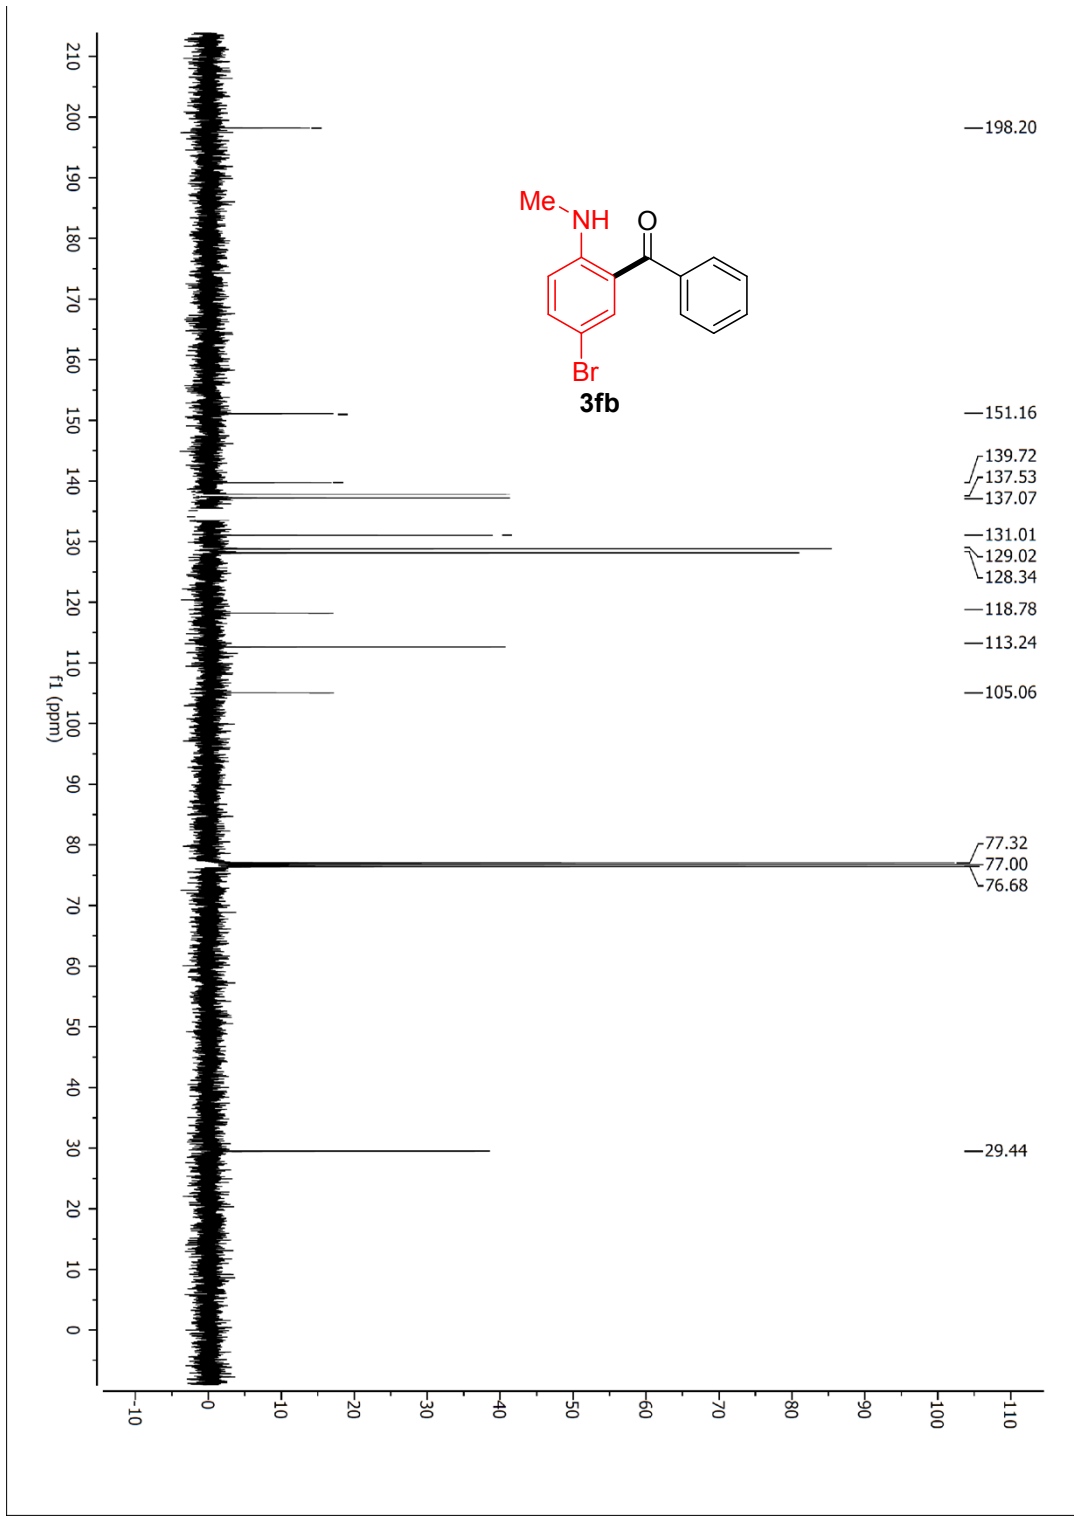

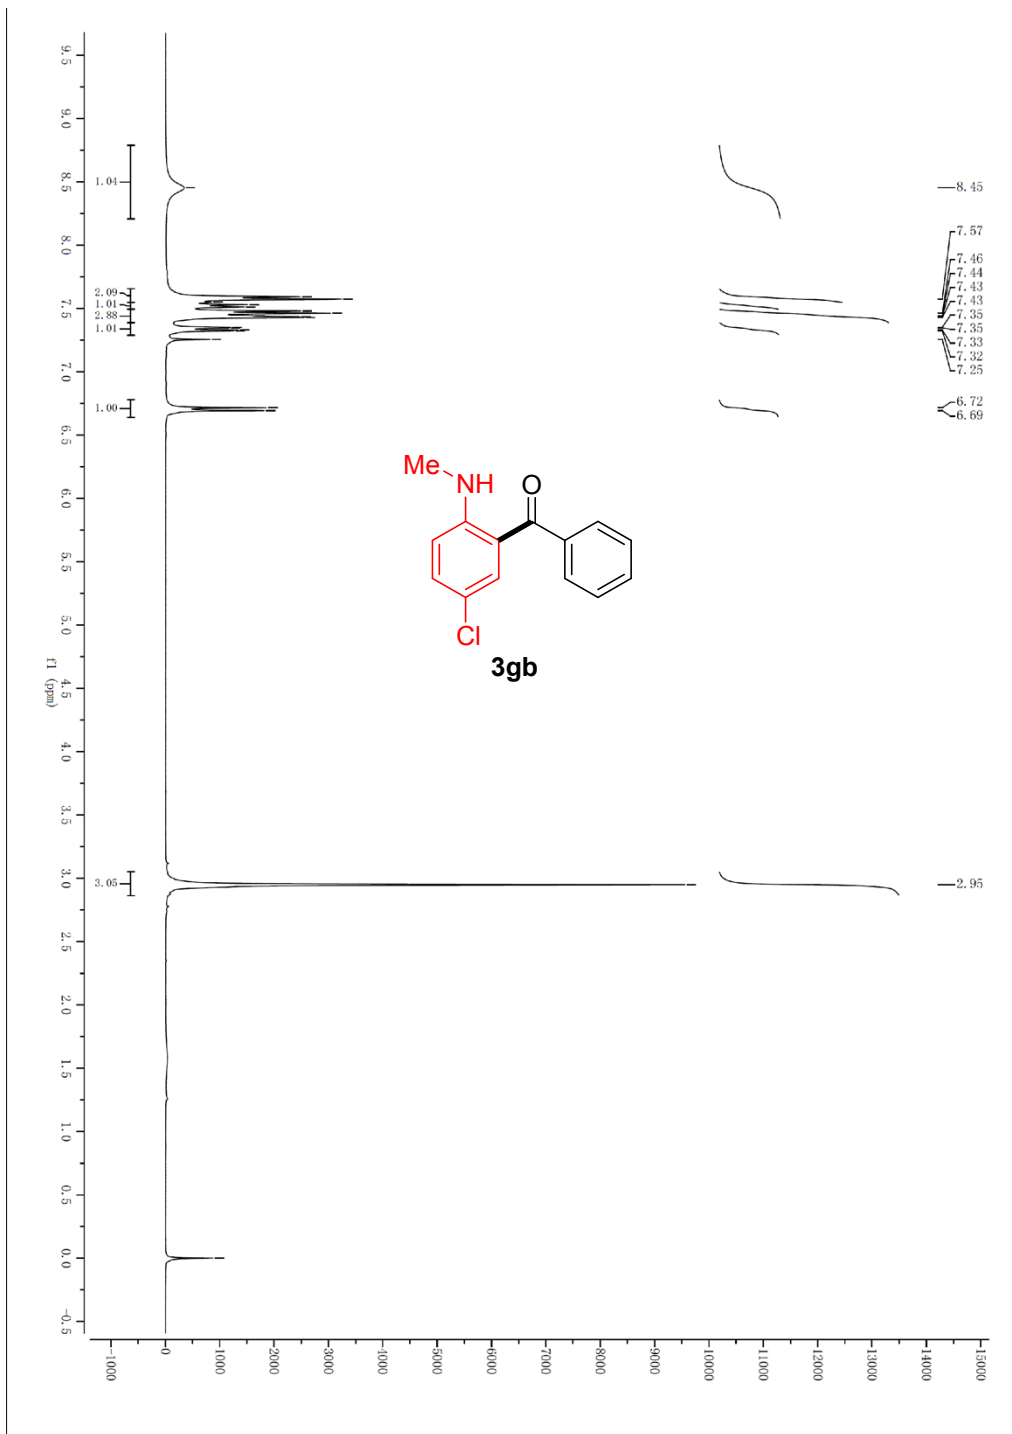



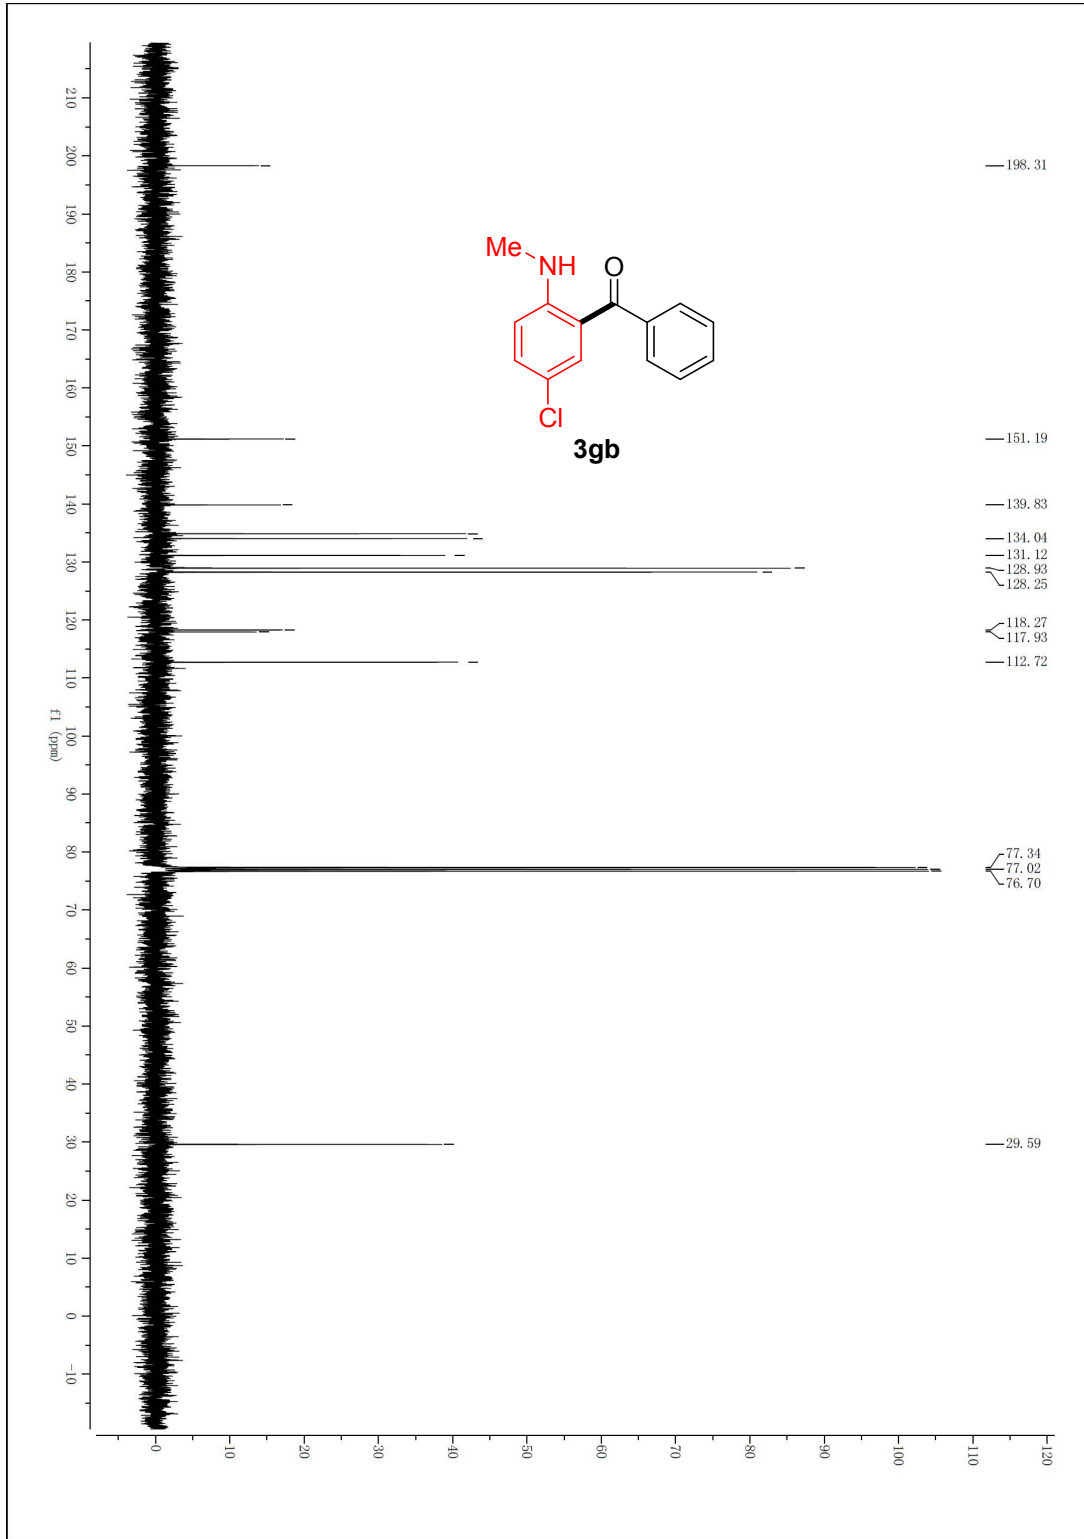

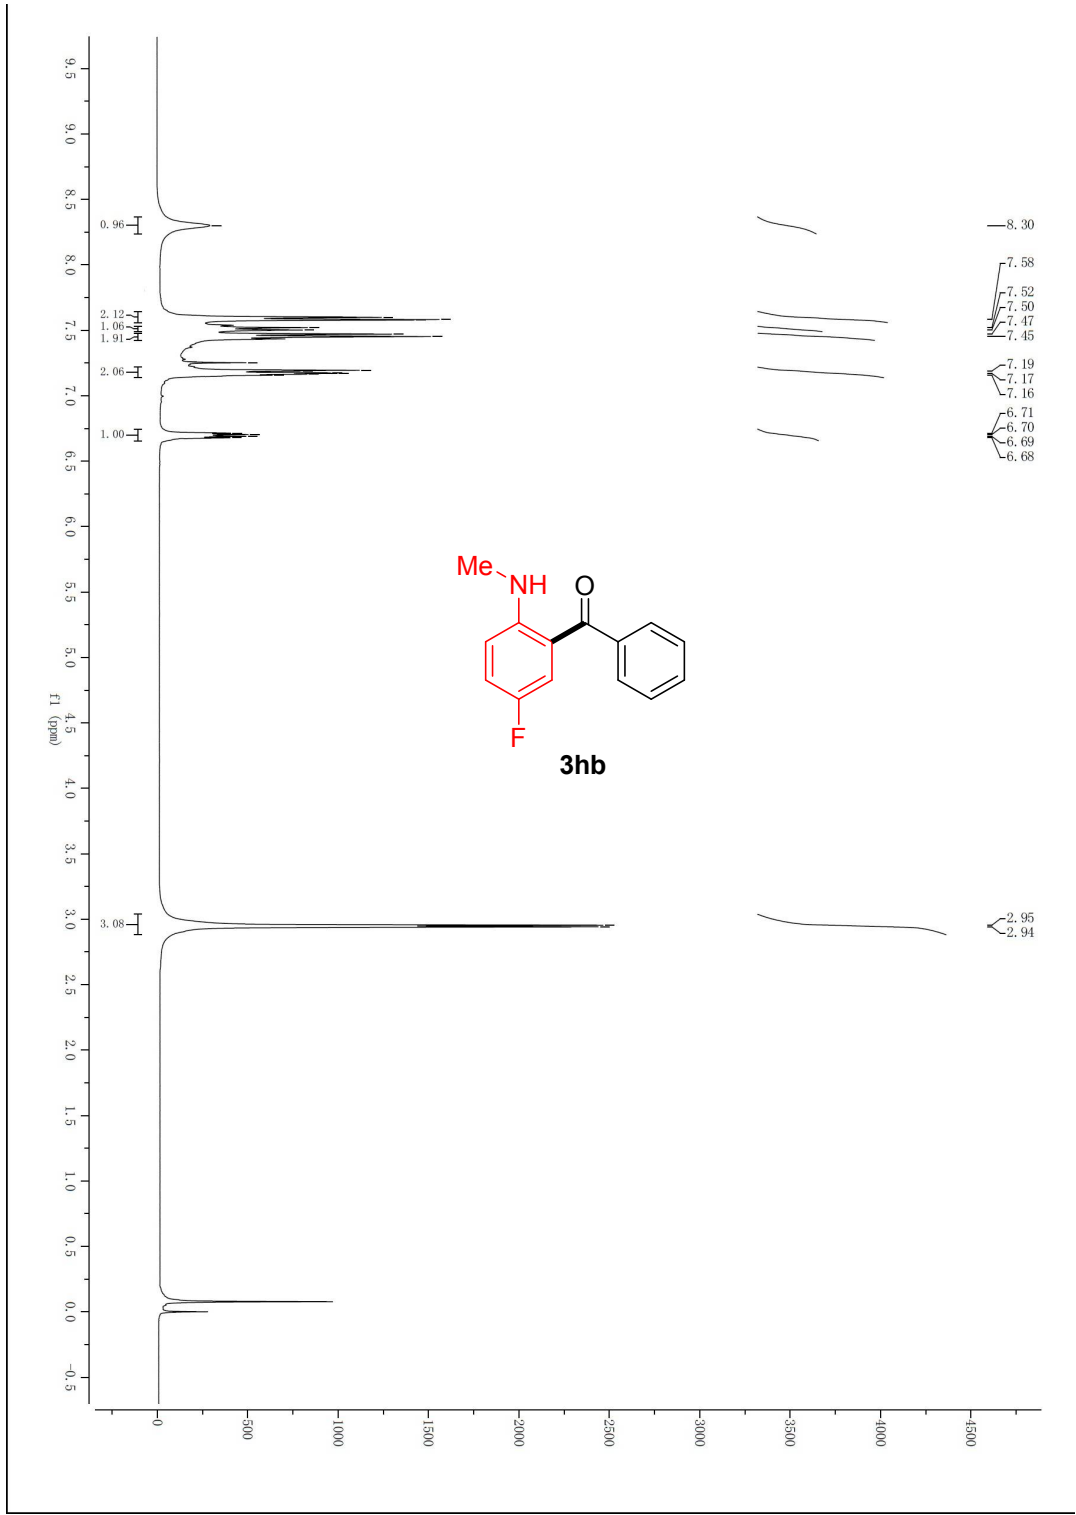

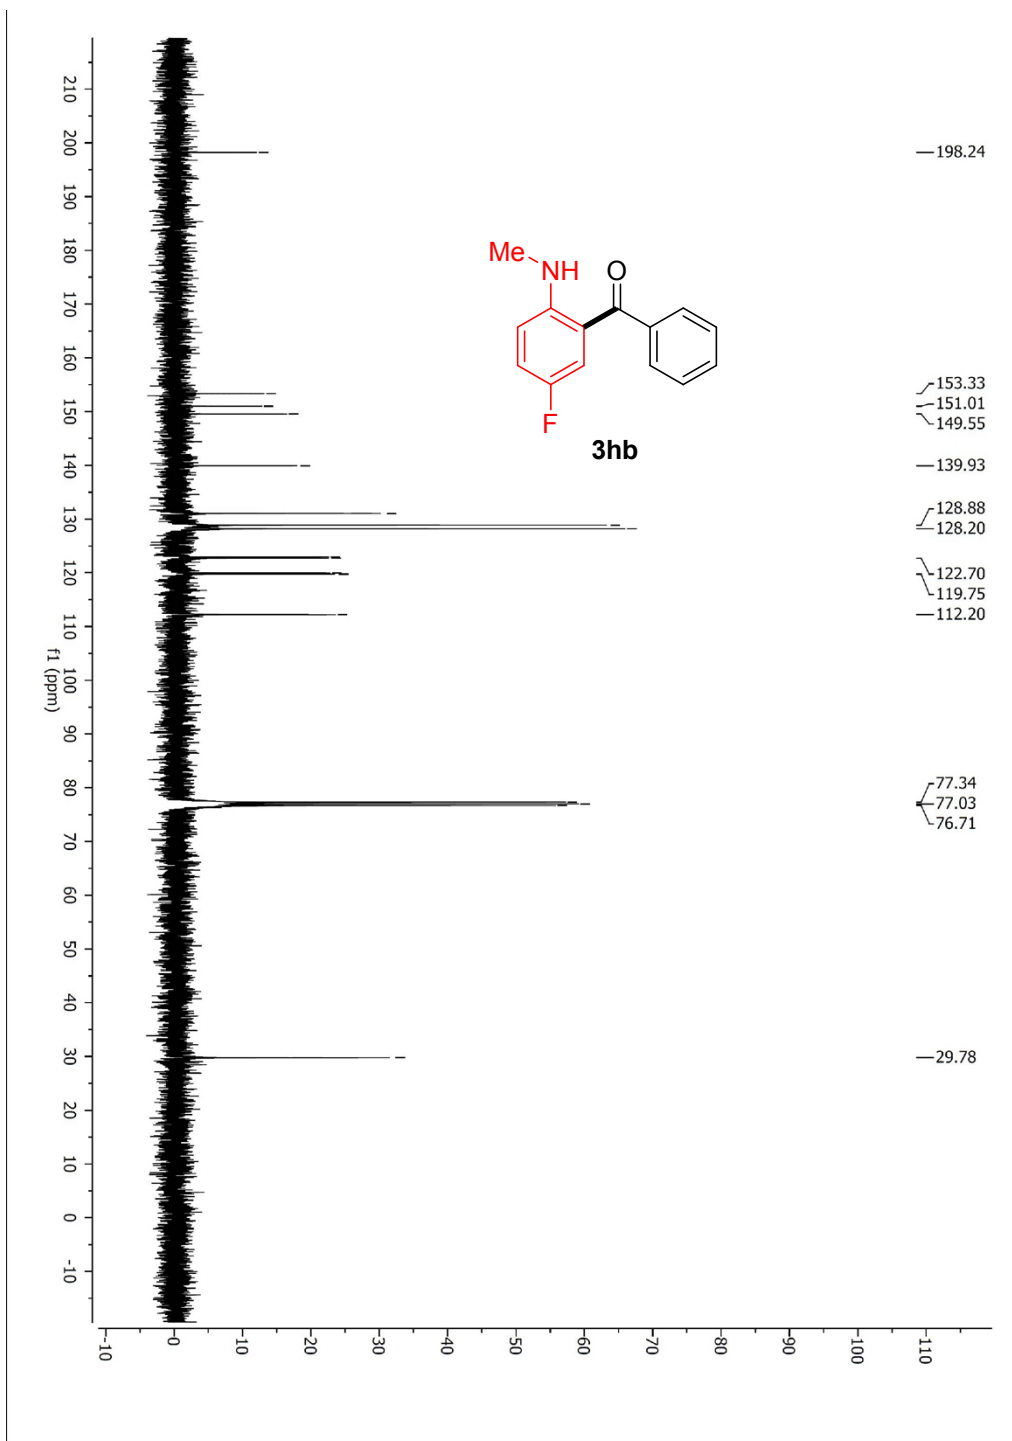

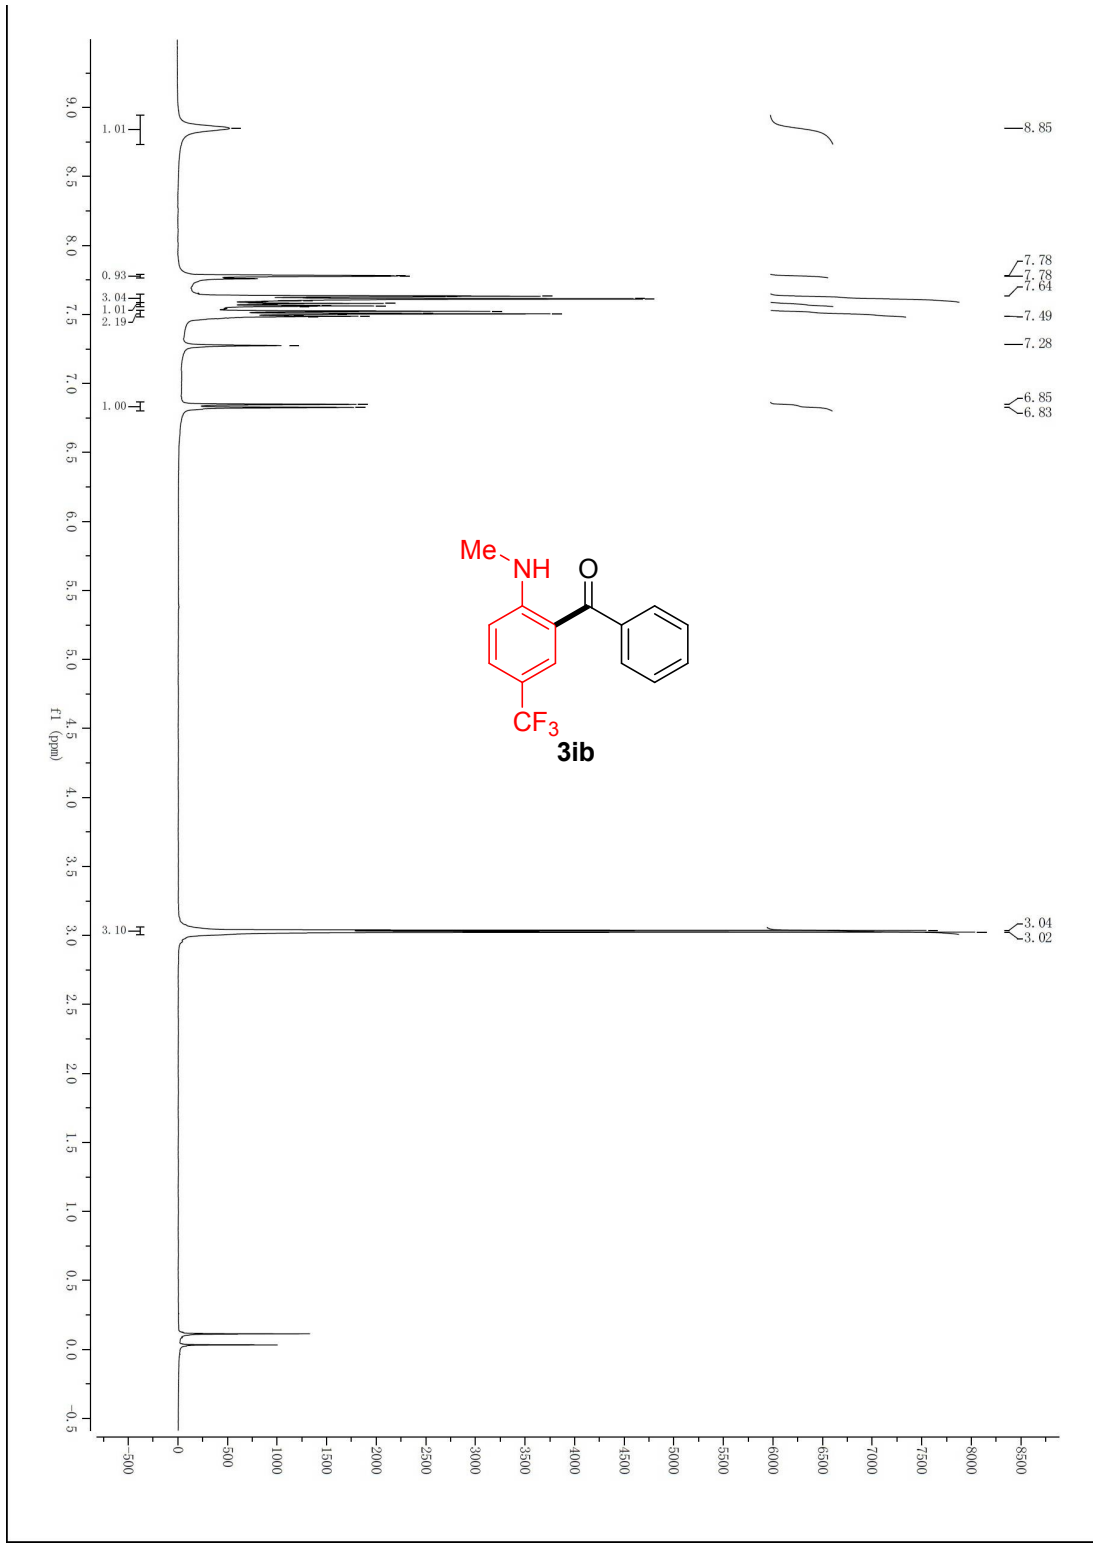

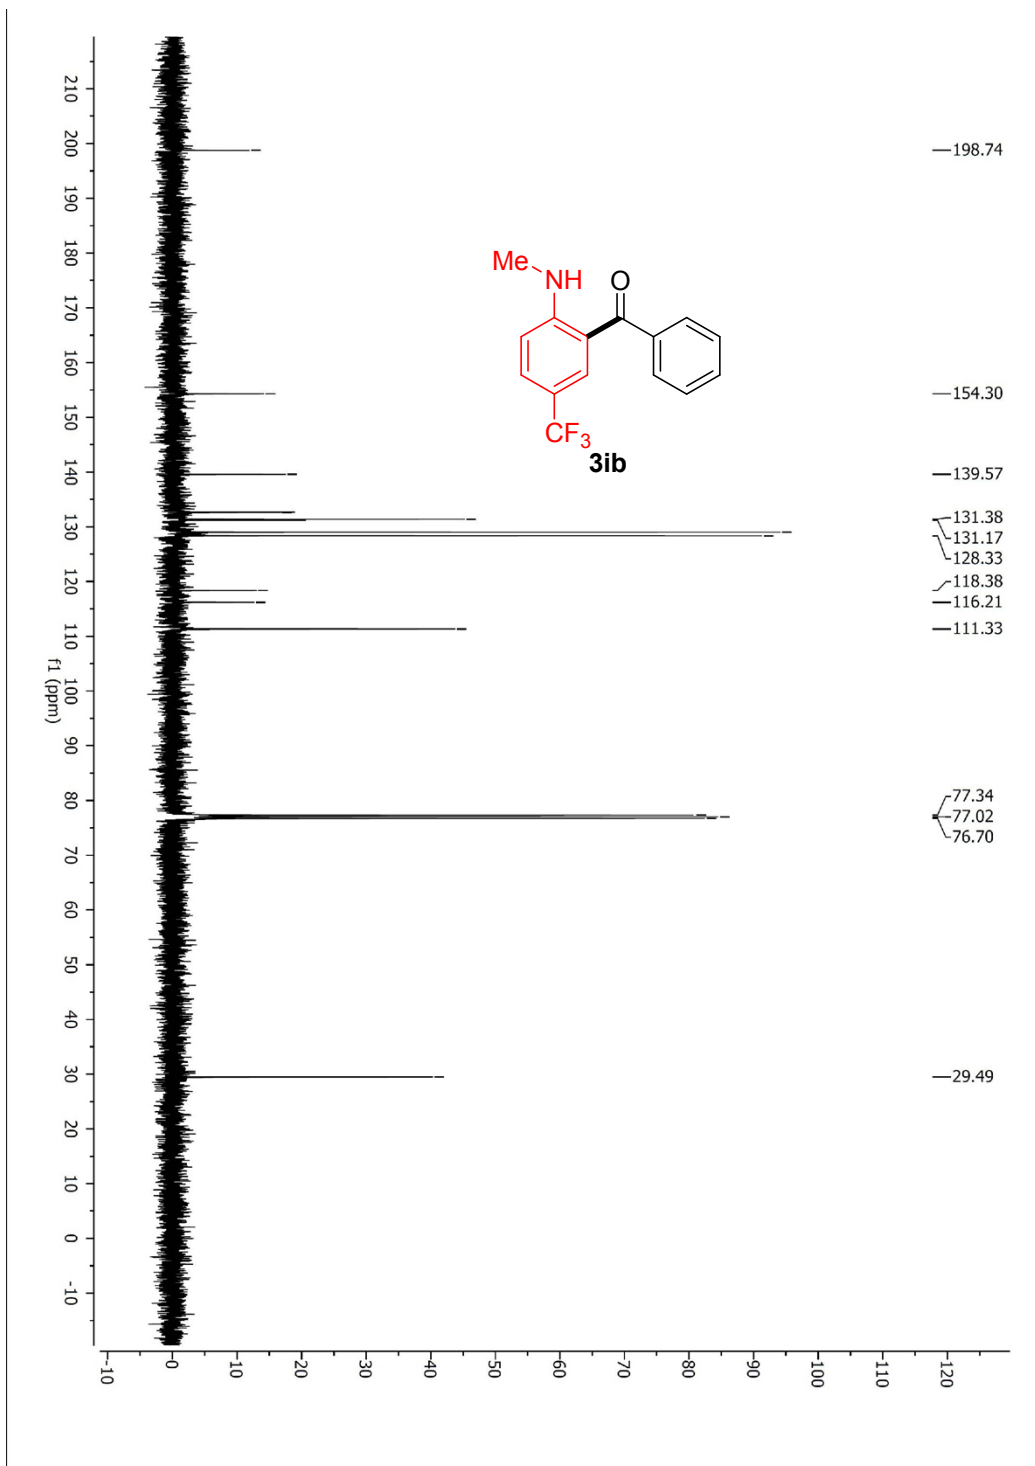

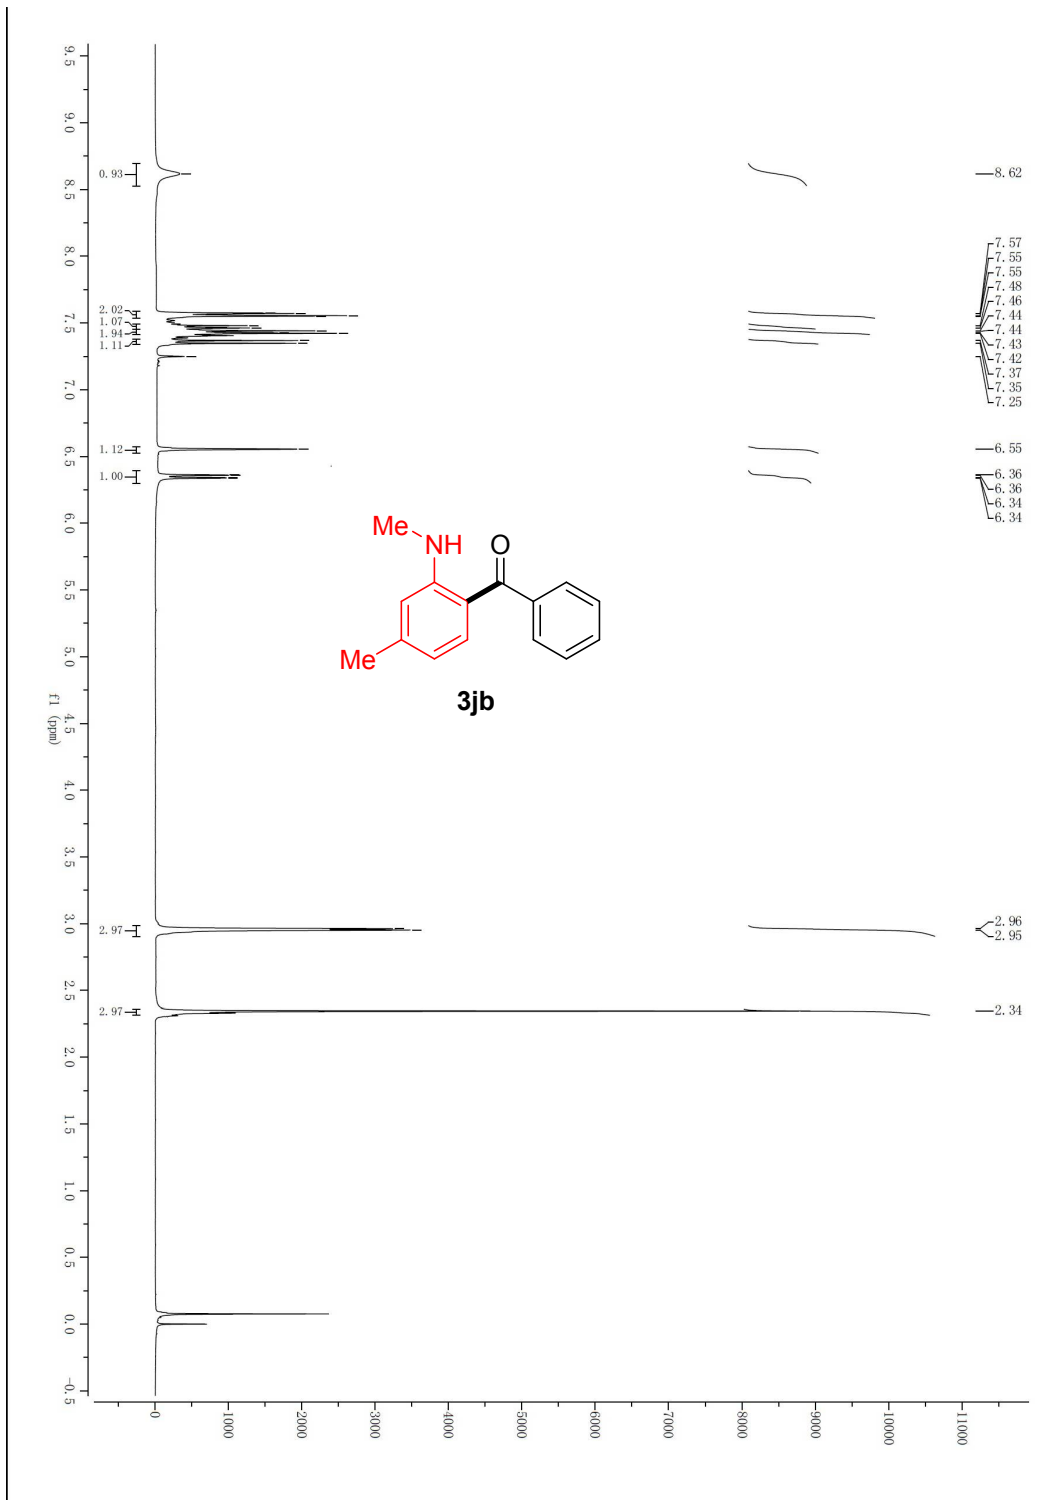

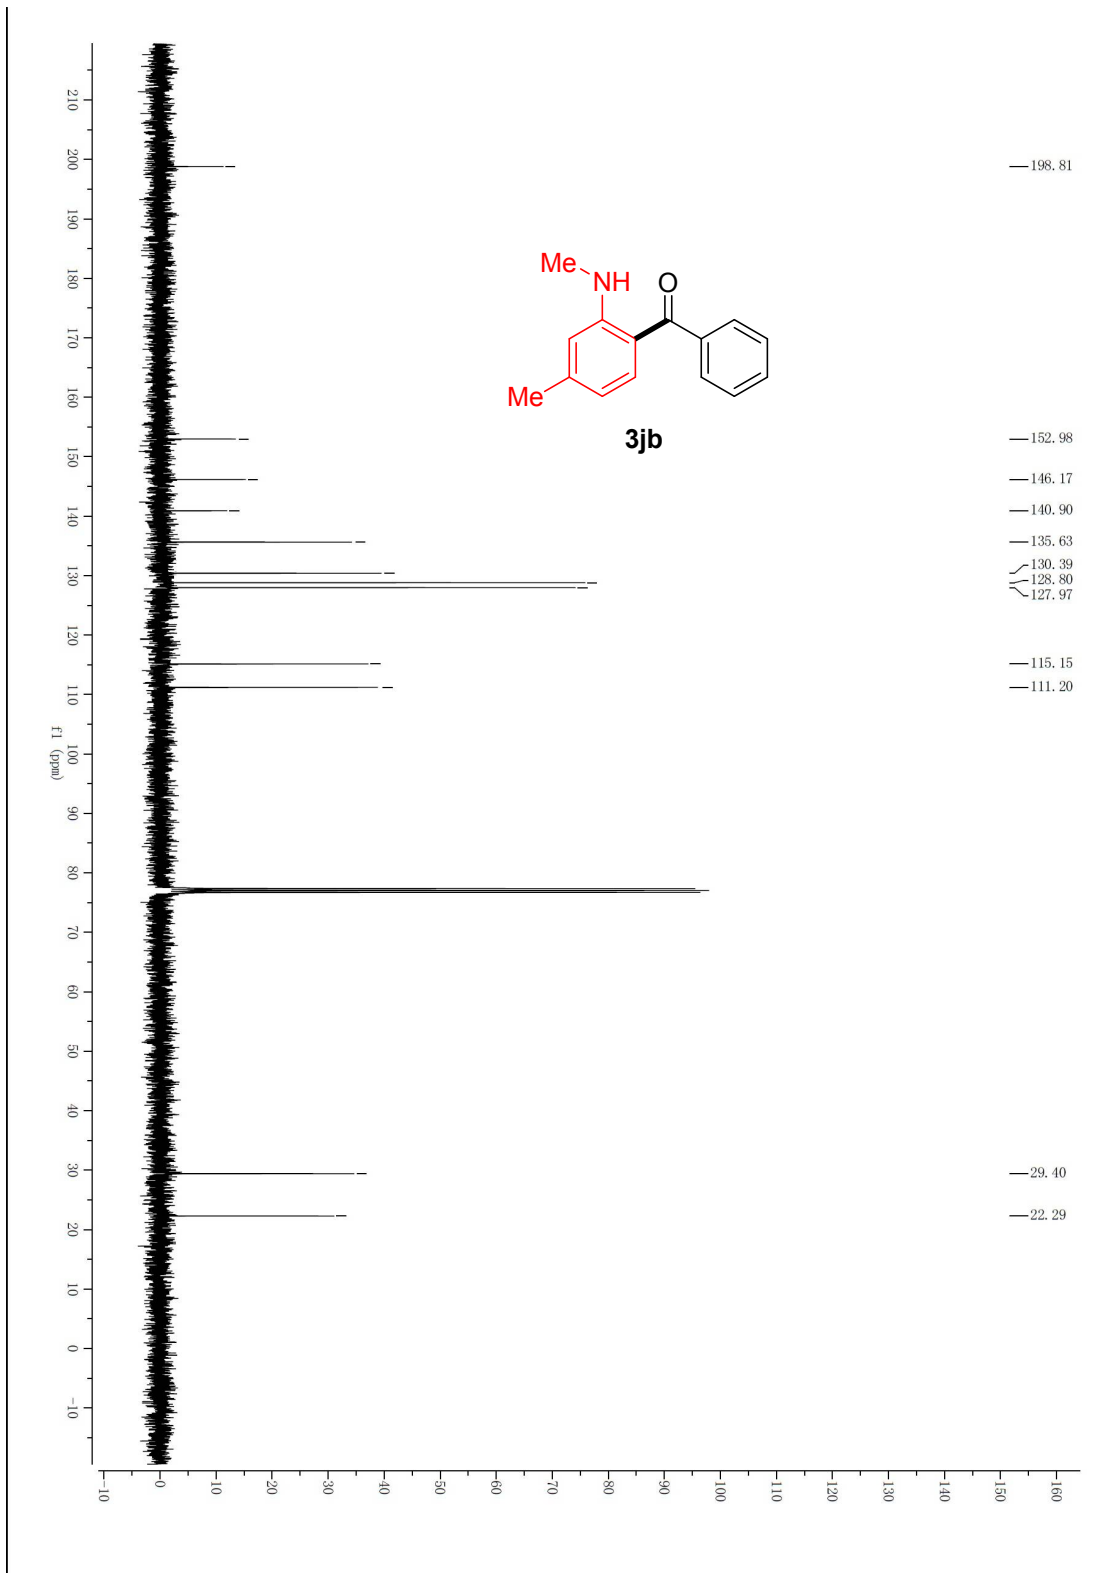

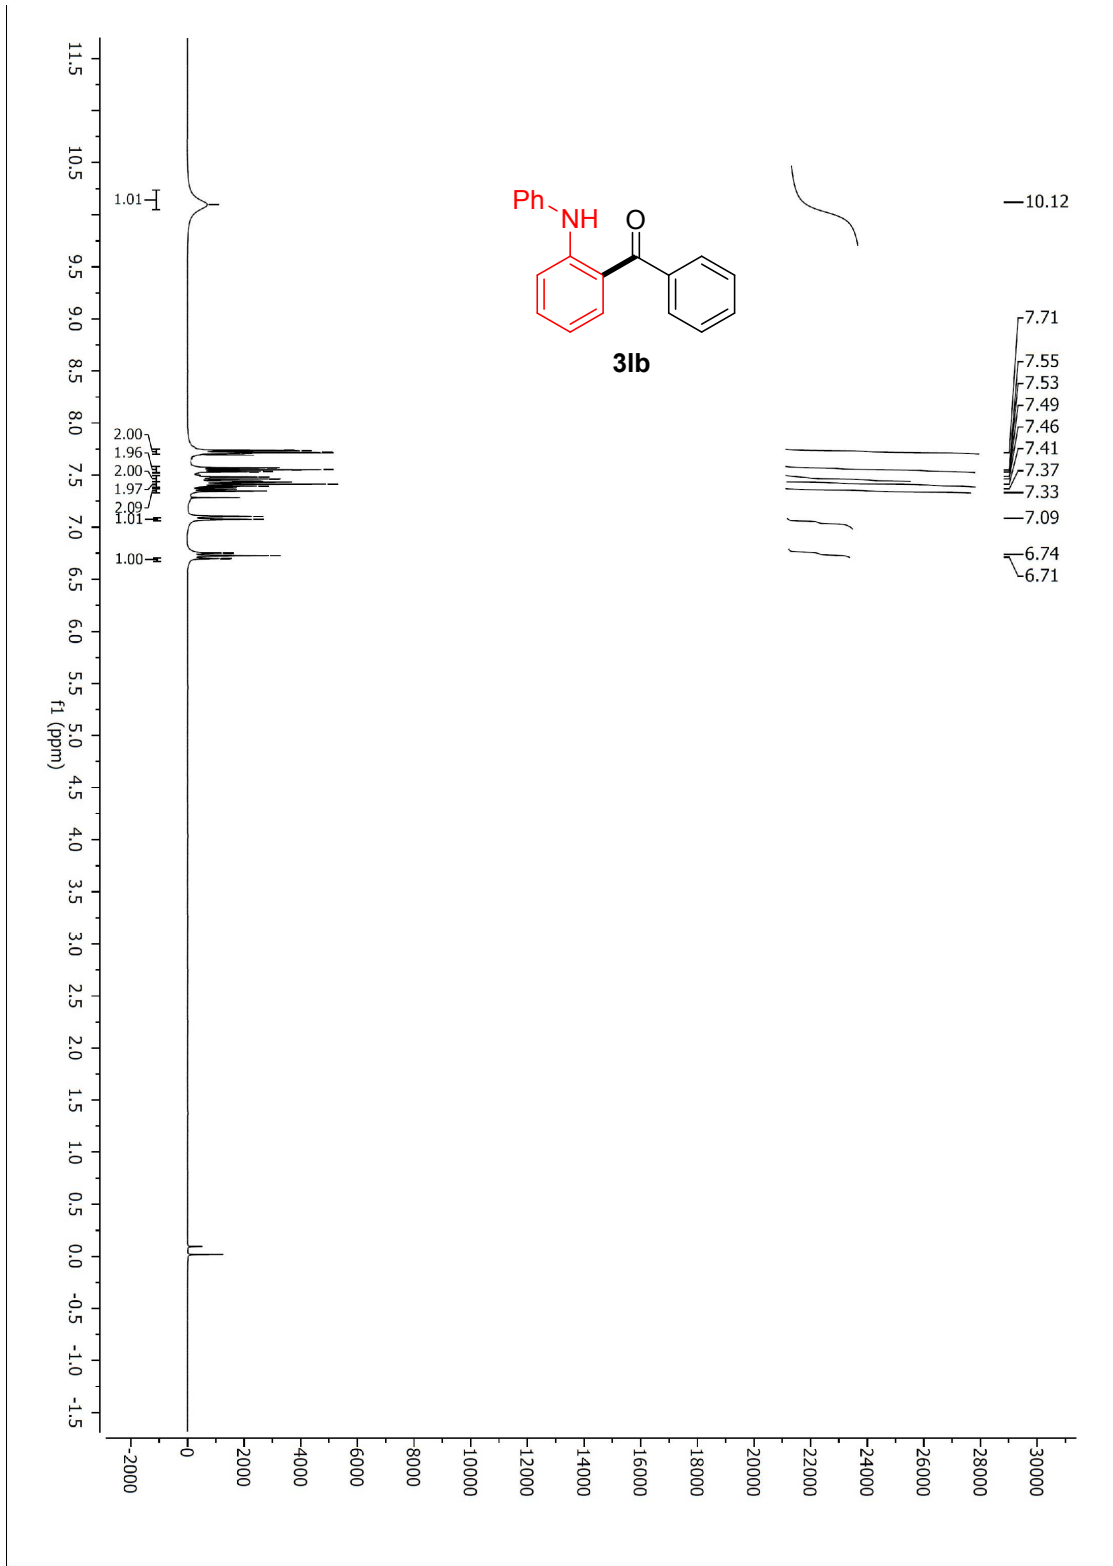



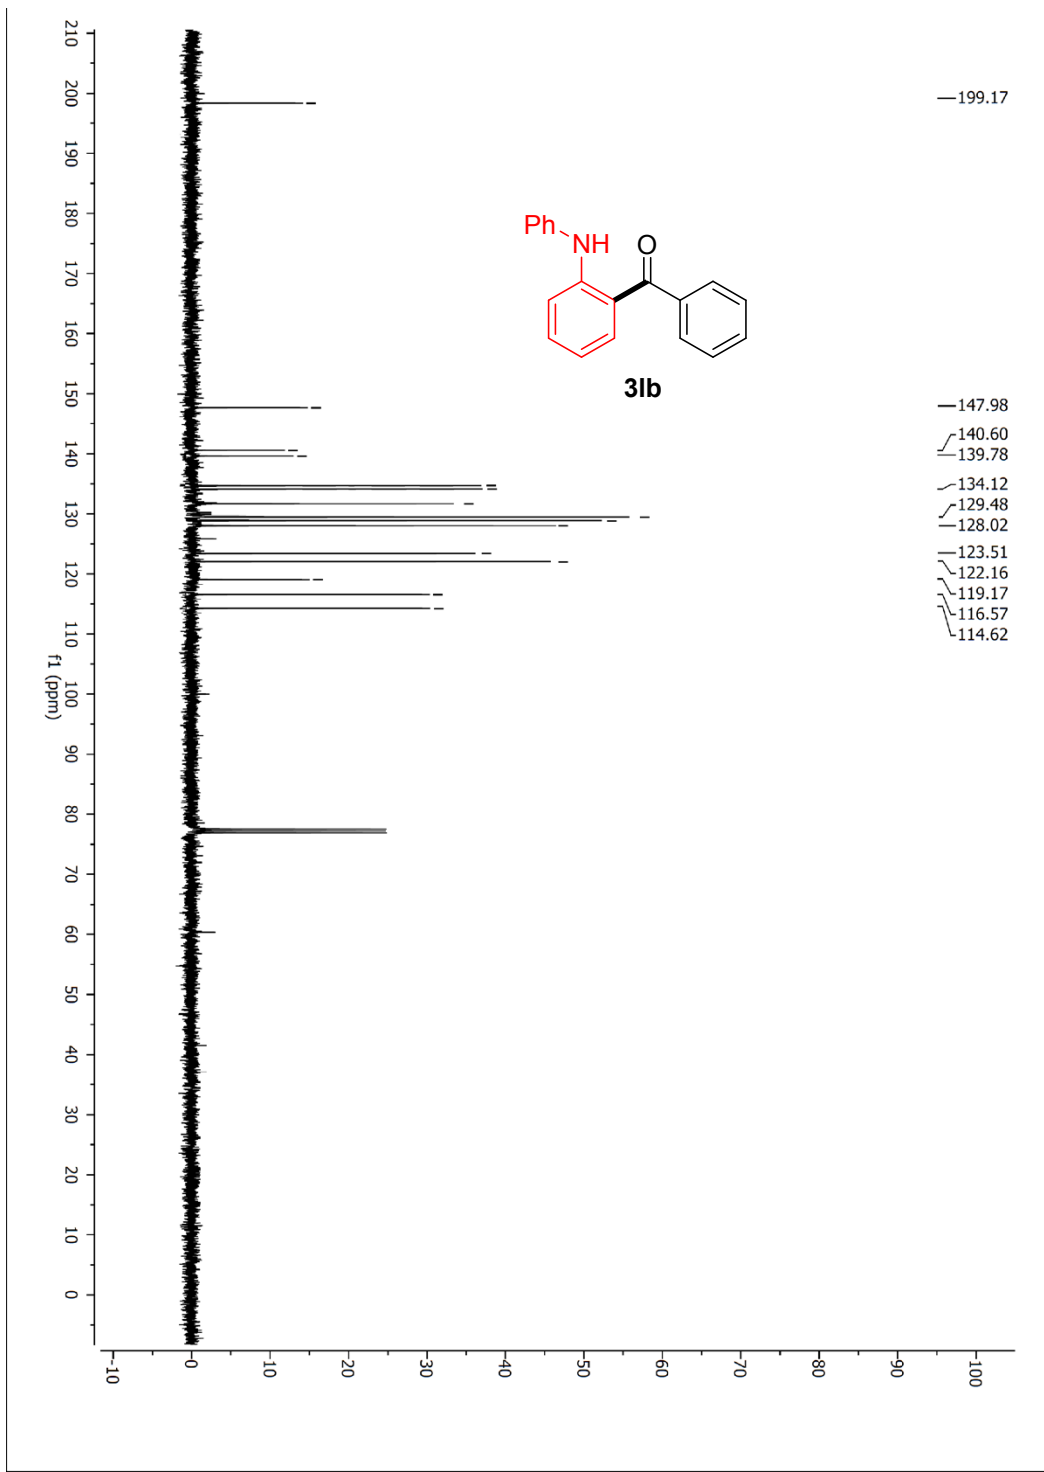

## 6.Reference

- [1] W. L. F. Armarego and D. D. Perrin, *In Purification of Laboratory Chemicals*, 4th Ed., Butterworth-Heinemann: Oxford UK: 1996.
- [2] C. Wang and Y. Huang, *Org. Lett.*, 2013, **15**, 5294.
